# Supplementary material for: Transcriptome Analysis of Cyclooctasulfur Oxidation and Reduction by the Neutrophilic Chemolithoautotrophic Sulfurovum indicum from Deep-Sea Hydrothermal Ecosystems
Source: MDPI journal article supplement (doi:10.3390/antiox12030627), 2023-03-03
Supplement: s1 [file s1]

**Table S1 Primers for qRT-PCR used in this study.**

| Gene name               | Gene ID       | Primer name                | Prime sequence                  | Product size (bp) | Amplification efficiency (%) | Slope  |
|-------------------------|---------------|----------------------------|---------------------------------|-------------------|------------------------------|--------|
| <i>soxH<sub>1</sub></i> | IMZ28_RS08590 | <i>soxH<sub>1</sub></i> -F | 5'-AGTTGTCTCTCTGGCTGCATTGAC-3'  | 118               | 99.91                        | -3.324 |
|                         |               | <i>soxH<sub>1</sub></i> -R | 5'-GACCATATCCCCGCCGTTTTGTTTG-3' |                   |                              |        |
| <i>soxB</i>             | IMZ28_RS08600 | <i>soxB</i> -F             | 5'-TCGCAAACCTGATGGAAGACATAGC-3' | 81                | 99.87                        | -3.325 |
|                         |               | <i>soxB</i> -R             | 5'-AACGACTCATATCACCACCCTGTTG-3' |                   |                              |        |
| <i>soxA</i>             | IMZ28_RS08605 | <i>soxA</i> -F             | 5'-TGAAGAGGAGTTGGGCGGAGATG-3'   | 141               | 98.99                        | -3.346 |
|                         |               | <i>soxA</i> -R             | 5'-GCCTGCATCACCTGATCCAATCC-3'   |                   |                              |        |
| <i>soxZ<sub>1</sub></i> | IMZ28_RS08610 | <i>soxZ<sub>1</sub></i> -F | 5'-AGGTATGGGAAACAGTTTCGAC-3'    | 106               | 99.66                        | -3.330 |
|                         |               | <i>soxZ<sub>1</sub></i> -R | 5'-TTCTTCTCGCCTGTGTTGTC-3'      |                   |                              |        |
| <i>soxY<sub>1</sub></i> | IMZ28_RS08615 | <i>soxY<sub>1</sub></i> -F | 5'-GAAGCGATCACGGGCGGTAAAG-3'    | 85                | 99.87                        | -3.325 |
|                         |               | <i>soxY<sub>1</sub></i> -R | 5'-CAACTGCTCCGTTCTCTGCGATC-3'   |                   |                              |        |
| <i>soxX</i>             | IMZ28_RS08620 | <i>soxX</i> -F             | 5'-AACAGATGCGGAGGCGATTGC-3'     | 121               | 99.90                        | -3.324 |
|                         |               | <i>soxX</i> -R             | 5'-ACCGTCTTTGCCTTTCTGTTCAATG-3' |                   |                              |        |
| <i>soxH<sub>2</sub></i> | IMZ28_RS10560 | <i>soxH<sub>2</sub></i> -F | 5'-GGCAGGTGAGGCGGAGAAATG-3'     | 92                | 98.78                        | -3.352 |
|                         |               | <i>soxH<sub>2</sub></i> -R | 5'-AGGCTCTTGTCGGATAGGCAAATTC-3' |                   |                              |        |
| <i>soxZ<sub>2</sub></i> | IMZ28_RS10575 | <i>soxZ<sub>2</sub></i> -F | 5'-CATGCTTACTTACGACCAGGCAAAG-3' | 142               | 98.86                        | -3.350 |
|                         |               | <i>soxZ<sub>2</sub></i> -R | 5'-CTTGAATTTCCACTGCGGGTTCTTG-3' |                   |                              |        |
| <i>soxY<sub>2</sub></i> | IMZ28_RS10580 | <i>soxY<sub>2</sub></i> -F | 5'-CCTGATGCCTGGACAGCACATAC-3'   | 118               | 99.80                        | -3.327 |
|                         |               | <i>soxY<sub>2</sub></i> -R | 5'-CTCCTCCGTTACTTGCCACCTTTG-3'  |                   |                              |        |
| <i>soxD</i>             | IMZ28_RS10585 | <i>soxD</i> -F             | 5'-TGTTGTCGGCAGTTGTTGTAGCG-3'   | 116               | 99.96                        | -3.323 |
|                         |               | <i>soxD</i> -R             | 5'-CACAGGATATGTCACACCACCATCG-3' |                   |                              |        |
| <i>soxC</i>             | IMZ28_RS10590 | <i>soxC</i> -F             | 5'-ATCAGGTAAAGCGATCCAGCACTTC-3' | 87                | 99.92                        | -3.324 |
|                         |               | <i>soxC</i> -R             | 5'-AGATCCGTCCAAGGCTTCTCAGG-3'   |                   |                              |        |

|                          |               |                             |                                  |     |       |        |
|--------------------------|---------------|-----------------------------|----------------------------------|-----|-------|--------|
| <i>psrA</i> <sub>1</sub> | IMZ28_RS08440 | <i>psrA</i> <sub>1</sub> -F | 5'-AGCAACACAGCCGTCAAGATGG-3'     | 149 | 98.89 | -3.349 |
|                          |               | <i>psrA</i> <sub>1</sub> -R | 5'-CTACCTCTTCCCAAATCTCGCCAAG-3'  |     |       |        |
| <i>psrA</i> <sub>2</sub> | IMZ28_RS03620 | <i>psrA</i> <sub>2</sub> -F | 5'-CCAGATGGTACGTGCGGACAAC-3'     | 129 | 99.60 | -3.332 |
|                          |               | <i>psrA</i> <sub>2</sub> -R | 5'-TGCTGTTTCCTGGATACGCTTGAATG-3' |     |       |        |
| <i>psrA</i> <sub>3</sub> | IMZ28_RS06785 | <i>psrA</i> <sub>3</sub> -F | 5'-GGCGATCTTGAATGGTACGGACAG-3'   | 91  | 99.87 | -3.325 |
|                          |               | <i>psrA</i> <sub>3</sub> -R | 5'-GGCACAGTAACCGATAGTGGAACG-3'   |     |       |        |
| <i>psrA</i> <sub>4</sub> | IMZ28_RS07170 | <i>psrA</i> <sub>4</sub> -F | 5'-AACAGAACCCCATGCAATCCATACC-3'  | 128 | 99.93 | -3.324 |
|                          |               | <i>psrA</i> <sub>4</sub> -R | 5'-CGGCAGCACGACATCAGACATC-3'     |     |       |        |
| 16S rRNA                 |               | 16S rRNA-F                  | 5'-CTACCAAGCCAATGACGCCTAGC-3'    | 94  | 99.99 | -3.322 |
|                          |               | 16S rRNA-R                  | 5'-CCCACTGCTGCCTCCCGTAG-3'       |     |       |        |

---
