# Supplementary material for: Transcriptome Analysis of Cyclooctasulfur Oxidation and Reduction by the Neutrophilic Chemolithoautotrophic Sulfurovum indicum from Deep-Sea Hydrothermal Ecosystems
Source: Antioxidants (Basel). 2023 Mar 3;12(3):627. doi: 10.3390/antiox12030627 (PMC10045233; doi:10.3390/antiox12030627)
Supplement: Supplementary file 1 [file antioxidants-12-00627-s001.zip]

Archive with 11 entries (11 files):
- antioxidants-2202666-supplementary.pdf
- Figure S1.tif
- Figure S2.tif
- Figure S3.tif
- Figure S4.tif
- Figure S5.tif
- Table S1.pdf
- Table S2.xls
- Table S3.xls
- Table S4.xls
- Table S5.xls
