# Supplementary material for: Transcriptome Analysis of Cyclooctasulfur Oxidation and Reduction by the Neutrophilic Chemolithoautotrophic Sulfurovum indicum from Deep-Sea Hydrothermal Ecosystems
Source: Antioxidants (Basel). 2023 Mar 3;12(3):627. doi: 10.3390/antiox12030627 (PMC10045233; doi:10.3390/antiox12030627)
Supplement: Supplementary file 1 [file antioxidants-12-00627-s001.zip › Table S2.xls]

## Sheet: S0  vs Na2S2O3 up
Table S2-1. 212differentially up-regulated transcripts in S0 oxidation vs Na2S2O3 oxidation.
Gene ID	Gene name	Genedescription	S0 oxidation	Na2S2O3 oxidation	FoldChange	padj
IMZ28_RS04475		4Fe-4S binding protein && PF12801:4Fe-4S binding domain	944.503	137.57	6.86596	5.01461e-11
IMZ28_RS04480		TonB-dependent receptor && PF07715:TonB-dependent Receptor Plug Domain|PF00593:TonB dependent receptor	2203.57	392.311	5.61719	8.96296e-09
IMZ28_RS00185		nucleotidyltransferase family protein && PF00483:Nucleotidyl transferase	6064.8	1899.24	3.19305	0.00109173
IMZ28_RS00570		fumarylacetoacetate hydrolase family protein && PF01557:Fumarylacetoacetate (FAA) hydrolase family	1735.53	578.522	3.00015	1.53011e-06
IMZ28_RS06520		efflux RND transporter periplasmic adaptor subunit && PF16576	879.882	310.378	2.83389	1.34268e-09
IMZ28_RS02445		rhodanese-like domain-containing protein && PF00581:Rhodanese-like domain	1358.97	482.641	2.81535	4.20739e-06
IMZ28_RS02440		rhodanese-like domain-containing protein && PF00581:Rhodanese-like domain	838.97	303.024	2.76794	8.74252e-05
IMZ28_RS00195		glycosyltransferase family 4 protein && PF13439:Glycosyltransferase Family 4|PF00534:Glycosyl transferases group 1	747.026	278.291	2.68289	0.00167908
IMZ28_RS00560		TRAP transporter permease && PF11874:Domain of unknown function (DUF3394)|PF06808:Tripartite ATP-independent periplasmic transporter, DctM component	12755.2	4800.61	2.657	8.31904e-06
IMZ28_RS08360	metE	5-methyltetrahydropteroyltriglutamate--homocysteine S-methyltransferase && PF01717:Cobalamin-independent synthase, Catalytic domain|PF08267:Cobalamin-independent synthase, N-terminal domain	3542.53	1343.09	2.63782	2.2423e-08
IMZ28_RS07335	fdh3B	4Fe-4S dicluster domain-containing protein && PF13247:4Fe-4S dicluster domain	1811.96	715.32	2.53245	1.19013e-05
IMZ28_RS00565		OprD family outer membrane porin && PF03573:outer membrane porin, OprD family	9109.79	3602.45	2.52886	8.31904e-06
IMZ28_RS06515		TolC family protein && PF02321:Outer membrane efflux protein	506.177	203.426	2.48903	3.88041e-06
IMZ28_RS09075		YfdX family protein && PF10938:YfdX protein	8358.89	3374.09	2.47726	0.00190296
IMZ28_RS06525		efflux RND transporter permease subunit && PF00873:AcrB/AcrD/AcrF family	2341.5	952.959	2.45677	1.7185e-07
IMZ28_RS02435		hypothetical protein && -	669.165	275.121	2.43169	0.000813747
IMZ28_RS00255		hypothetical protein && -	818.724	339.099	2.41333	0.0123028
Novel00005		PF07963:Prokaryotic N-terminal methylation motif	1187.01	492.706	2.40979	0.000692625
sRNA00003		-	521.876	217.166	2.40148	0.00675135
IMZ28_RS07130		hypothetical protein && -	310.772	130.599	2.3815	0.00545123
IMZ28_RS00250		exopolysaccharide biosynthesis polyprenyl glycosylphosphotransferase && PF02397:Bacterial sugar transferase|PF03808:Glycosyl transferase WecB/TagA/CpsF family	6946.46	2975.01	2.3348	0.0170953
IMZ28_RS07310		OprD family outer membrane porin && PF03573:outer membrane porin, OprD family	323.084	139.077	2.32095	5.39652e-05
IMZ28_RS07135		hypothetical protein && -	1113.02	487.864	2.28189	0.000240421
IMZ28_RS00555		TAXI family TRAP transporter solute-binding subunit && PF16868:NMT1-like family	9064.11	4004.75	2.2634	3.17231e-05
IMZ28_RS07320		winged helix-turn-helix domain-containing protein && PF00126:Bacterial regulatory helix-turn-helix protein, lysR family	300.494	134.886	2.22616	0.00034156
IMZ28_RS07315		molybdopterin molybdotransferase MoeA && PF03453:MoeA N-terminal region (domain I and II)|PF03454:MoeA C-terminal region (domain IV)|PF00994:Probable molybdopterin binding domain	603.962	275.015	2.19503	0.000142914
IMZ28_RS00905		hemerythrin domain-containing protein && PF01814:Hemerythrin HHE cation binding domain	2113.03	967.814	2.18356	0.00654952
IMZ28_RS00175		glycosyltransferase family 4 protein && PF00534:Glycosyl transferases group 1	3789.52	1736.82	2.18161	0.0053186
IMZ28_RS00900		DUF2249 domain-containing protein && PF10006:Uncharacterized conserved protein (DUF2249)	931.475	427.343	2.18024	0.00178312
IMZ28_RS01420		TonB-dependent receptor && PF00593:TonB dependent receptor|PF07715:TonB-dependent Receptor Plug Domain	1539.22	707.421	2.17608	0.0224016
IMZ28_RS07195		phosphoadenylyl-sulfate reductase && PF01507:Phosphoadenosine phosphosulfate reductase family	395.013	181.506	2.17477	0.0288119
IMZ28_RS01745		carbon-nitrogen hydrolase && PF00795:Carbon-nitrogen hydrolase	570.508	263.278	2.16685	4.79439e-06
IMZ28_RS07185	cysN	sulfate adenylyltransferase subunit CysN && PF00009:Elongation factor Tu GTP binding domain	3338.67	1545.6	2.15991	0.0379178
IMZ28_RS01610		type II secretion system protein && PF07963:Prokaryotic N-terminal methylation motif	74262.5	34969	2.12368	0.00203506
IMZ28_RS05525		hypothetical protein && -	5474.8	2618.99	2.09031	0.000658286
IMZ28_RS10785		MoxR family ATPase && PF07726:ATPase family associated with various cellular activities (AAA)	757.176	364.32	2.07765	0.000476156
IMZ28_RS07340		formate dehydrogenase subunit alpha && PF01568:Molydopterin dinucleotide binding domain|PF00384:Molybdopterin oxidoreductase|PF04879:Molybdopterin oxidoreductase Fe4S4 domain	8129.11	3921.57	2.0728	0.000346398
IMZ28_RS07190	cysD	sulfate adenylyltransferase subunit CysD && PF01507:Phosphoadenosine phosphosulfate reductase family	2394.4	1164.96	2.05506	0.0131569
IMZ28_RS05295		OprD family outer membrane porin && PF03573:outer membrane porin, OprD family	875.123	426.88	2.04949	0.00644805
IMZ28_RS00245		glycosyltransferase family 4 protein && PF13439:Glycosyltransferase Family 4|PF00534:Glycosyl transferases group 1	882.802	434.446	2.03105	0.013717
IMZ28_RS07235		TDT family transporter && PF03595:Voltage-dependent anion channel	289.74	142.842	2.02726	0.0052893
IMZ28_RS06730		nickel-dependent hydrogenase large subunit && PF00346:Respiratory-chain NADH dehydrogenase, 49 Kd subunit|PF00374:Nickel-dependent hydrogenase	1188.66	589.171	2.01792	3.15753e-05
IMZ28_RS07355		4Fe-4S binding protein && PF13237:4Fe-4S dicluster domain|PF13187:4Fe-4S dicluster domain	871.17	435.45	2.00136	0.00034156
IMZ28_RS05305		cation acetate symporter && PF00474:Sodium:solute symporter family	3559.47	1786.87	1.99176	0.0111121
IMZ28_RS10425		transporter && -	770.258	387.164	1.99018	7.3815e-05
IMZ28_RS07140		hypothetical protein && -	570.922	287.238	1.98811	0.00504982
IMZ28_RS03980		aminotransferase class I/II-fold pyridoxal phosphate-dependent enzyme && PF00155:Aminotransferase class I and II	368.156	186.171	1.97692	0.00575615
IMZ28_RS00170		hypothetical protein && -	1417.6	717.102	1.97626	0.0263285
IMZ28_RS07110		hypothetical protein && -	1328.58	678.645	1.95784	0.00443623
IMZ28_RS05580		SH3 domain-containing protein && PF12912:NLPC_P60 stabilising domain, N term|PF12913:SH3 domain (SH3b1 type)|PF00877:NlpC/P60 family|PF12914:SH3 domain of SH3b2 type	944.023	484.189	1.94913	4.50297e-05
IMZ28_RS07105		ThiF family adenylyltransferase && PF00899:ThiF family	1349.19	697.014	1.93579	0.00109173
IMZ28_RS06735		4Fe-4S dicluster domain-containing protein && PF13247:4Fe-4S dicluster domain	537.951	278.156	1.93459	0.000142914
IMZ28_RS08855	htpX	zinc metalloprotease HtpX && PF01435:Peptidase family M48	3118.32	1618.96	1.9259	0.000937842
IMZ28_RS00165		polysaccharide deacetylase family protein && PF01522:Polysaccharide deacetylase	1236.41	645.591	1.91457	0.0303469
IMZ28_RS09405	napG	ferredoxin-type protein NapG && PF12838:4Fe-4S dicluster domain	15514.8	8123.93	1.90972	0.000240421
IMZ28_RS00235		response regulator && PF01627:Hpt domain|PF00512:His Kinase A (phospho-acceptor) domain|PF00072:Response regulator receiver domain|PF08447:PAS fold|PF02518:Histidine kinase-, DNA gyrase B-, and HSP90-like ATPase	1925.28	1012.22	1.9019	3.55895e-05
IMZ28_RS01315		hypothetical protein && -	8743.26	4602.32	1.89979	2.11369e-05
IMZ28_RS06725		NADH-quinone oxidoreductase subunit C && PF00329:Respiratory-chain NADH dehydrogenase, 30 Kd subunit	418.529	220.513	1.89842	0.00061998
IMZ28_RS07350		molecular chaperone TorD family protein && PF02613:Nitrate reductase delta subunit	170.981	90.9977	1.87892	0.0175678
IMZ28_RS03925		bi-domain-containing oxidoreductase && PF00107:Zinc-binding dehydrogenase|PF01408:Oxidoreductase family, NAD-binding Rossmann fold	1591.37	851.394	1.86893	0.00148121
IMZ28_RS02095		MoxR family ATPase && PF07726:ATPase family associated with various cellular activities (AAA)	3305.29	1782.07	1.85462	0.000813747
IMZ28_RS07155		AAA family ATPase && PF10431:C-terminal, D2-small domain, of ClpB protein|PF07724:AAA domain (Cdc48 subfamily)	353.586	191.249	1.84985	0.00816524
IMZ28_RS02125		BatD family protein && PF13584:Oxygen tolerance	1563.44	854.741	1.82923	0.000307512
IMZ28_RS06610	hypB	hydrogenase nickel incorporation protein HypB && PF02492:CobW/HypB/UreG, nucleotide-binding domain	2293.17	1255.8	1.82576	0.0381586
IMZ28_RS10790		DUF58 domain-containing protein && PF01882:Protein of unknown function DUF58	357.169	195.778	1.82524	0.0128417
IMZ28_RS07325	fdhD	formate dehydrogenase accessory sulfurtransferase FdhD && PF02634:FdhD/NarQ family	278.532	152.89	1.82223	0.0063511
IMZ28_RS02530	raiA	ribosome-associated translation inhibitor RaiA && PF02482:Sigma 54 modulation protein / S30EA ribosomal protein|PF16321:Sigma 54 modulation/S30EA ribosomal protein C terminus	16743	9188.22	1.8222	3.36285e-05
IMZ28_RS05520		hypothetical protein && -	7175.05	3942.43	1.81995	0.00188891
IMZ28_RS03985		phosphotransferase && PF01636:Phosphotransferase enzyme family	304.876	168.53	1.80913	0.0364325
IMZ28_RS06720		4Fe-4S dicluster domain-containing protein && PF01058:NADH ubiquinone oxidoreductase, 20 Kd subunit|PF13187:4Fe-4S dicluster domain	760.939	421.64	1.80488	0.00104759
IMZ28_RS00545		response regulator transcription factor && PF00486:Transcriptional regulatory protein, C terminal|PF00072:Response regulator receiver domain	215.86	119.652	1.8029	0.0047368
IMZ28_RS05325	acs	acetate--CoA ligase && PF00501:AMP-binding enzyme|PF16177:Acetyl-coenzyme A synthetase N-terminus|PF13193:AMP-binding enzyme C-terminal domain	21905.3	12358	1.77253	0.0136714
IMZ28_RS07390		OprD family outer membrane porin && PF03573:outer membrane porin, OprD family	854.749	482.955	1.76927	0.00144388
IMZ28_RS09025	cysK	cysteine synthase A && PF00291:Pyridoxal-phosphate dependent enzyme	870.685	492.716	1.76755	0.00217519
IMZ28_RS05080		Hsp20/alpha crystallin family protein && PF00011:Hsp20/alpha crystallin family	5507.83	3126.31	1.76169	0.02144
IMZ28_RS00160		glycosyltransferase && PF00535:Glycosyl transferase family 2	1310.99	744.246	1.76103	0.00318467
IMZ28_RS07330		cytochrome b/b6 domain-containing protein && PF00033:Cytochrome b/b6/petB	639.551	363.688	1.75737	0.0329365
IMZ28_RS07300	wtpA	tungstate ABC transporter substrate-binding protein WtpA && PF13531:Bacterial extracellular solute-binding protein	270.997	154.121	1.75703	0.0150526
IMZ28_RS03620		nitrate reductase && PF01568:Molydopterin dinucleotide binding domain|PF00384:Molybdopterin oxidoreductase|PF04879:Molybdopterin oxidoreductase Fe4S4 domain	5444.42	3102.79	1.75456	0.00880046
IMZ28_RS06740	hypA	hydrogenase maturation nickel metallochaperone HypA && PF01155:Hydrogenase/urease nickel incorporation, metallochaperone, hypA	234.829	134.006	1.75386	0.0422721
IMZ28_RS09930		cytochrome c oxidase%2C cbb3-type%2C CcoQ subunit && PF05545:Cbb3-type cytochrome oxidase component FixQ	1039.31	595.154	1.7456	0.0229167
IMZ28_RS09555		cbb3-type cytochrome c oxidase subunit I && PF00115:Cytochrome C and Quinol oxidase polypeptide I	44528.5	25718.7	1.73137	0.0288119
IMZ28_RS10780		BatD family protein && PF13584:Oxygen tolerance	408.107	236.265	1.72612	0.00443623
IMZ28_RS09830		2-oxoacid:ferredoxin oxidoreductase subunit alpha && PF02780:Transketolase, C-terminal domain|PF01855:Pyruvate flavodoxin/ferredoxin oxidoreductase, thiamine diP-bdg	21363.9	12426.1	1.71925	0.003653
IMZ28_RS08320		thiazole synthase && PF05690:Thiazole biosynthesis protein ThiG	2019.95	1179	1.71304	0.00291902
IMZ28_RS00895		hypothetical protein && -	1361.06	795.907	1.71033	0.0334348
IMZ28_RS00695		SAM-dependent DNA methyltransferase && PF12161:HsdM N-terminal domain|PF02384:N-6 DNA Methylase	560.26	328.374	1.70691	0.0107179
IMZ28_RS09030		aminotransferase class IV && PF01063:Amino-transferase class IV	105.593	61.9998	1.7037	0.0440832
IMZ28_RS03530	mshL	pilus (MSHA type) biogenesis protein MshL && PF00263:Bacterial type II and III secretion system protein|PF07655:Secretin N-terminal domain	3821.94	2255.38	1.69457	0.00300687
IMZ28_RS02110		VWA domain-containing protein && PF13519:von Willebrand factor type A domain	1050.24	621.586	1.68916	0.00854327
IMZ28_RS10580	soxD	c-type cytochrome && PF13442:Cytochrome C oxidase, cbb3-type, subunit III	21937.7	12992.5	1.68846	0.00446093
IMZ28_RS03810	wecB	UDP-N-acetylglucosamine 2-epimerase (non-hydrolyzing) && PF02350:UDP-N-acetylglucosamine 2-epimerase	199.585	118.287	1.68841	0.0455224
IMZ28_RS09870		FAD-dependent oxidoreductase && PF07992:Pyridine nucleotide-disulphide oxidoreductase	14581.6	8658.24	1.68409	0.000676698
IMZ28_RS01805		hypothetical protein && -	515.949	306.482	1.68338	0.00906685
IMZ28_RS01180	nuoL	NADH-quinone oxidoreductase subunit L && PF00662:NADH-Ubiquinone oxidoreductase (complex I), chain 5 N-terminus|PF00361:Proton-conducting membrane transporter	11175.2	6644.85	1.68173	0.02144
IMZ28_RS01165	nuoI	NADH-quinone oxidoreductase subunit NuoI && PF12838:4Fe-4S dicluster domain	4809.91	2862.55	1.6802	0.0131803
IMZ28_RS02375	cysN	sulfate adenylyltransferase subunit CysN && PF00009:Elongation factor Tu GTP binding domain	1740.89	1036.1	1.68012	0.0143242
IMZ28_RS10715		TIGR04219 family outer membrane beta-barrel protein && -	603.697	360.177	1.67661	0.00635867
IMZ28_RS04610	trxC	thioredoxin TrxC && PF00085:Thioredoxin	1516.36	905.246	1.67487	0.0130746
IMZ28_RS04415	ccsA	cytochrome c biogenesis protein CcsA && PF05140:ResB-like family|PF01578:Cytochrome C assembly protein	7003.5	4183.79	1.67389	0.00543295
IMZ28_RS04030		TonB-dependent receptor && PF07715:TonB-dependent Receptor Plug Domain|PF00593:TonB dependent receptor	3737.65	2243.62	1.66595	0.0150526
IMZ28_RS03995		cobyric acid synthase && PF01656:CobQ/CobB/MinD/ParA nucleotide binding domain|PF07685:CobB/CobQ-like glutamine amidotransferase domain	586.37	352.312	1.66389	0.02669
IMZ28_RS10345		DegT/DnrJ/EryC1/StrS family aminotransferase && PF01041:DegT/DnrJ/EryC1/StrS aminotransferase family	354.04	212.941	1.66246	0.00639356
IMZ28_RS09395		cytochrome C && -	4152.61	2499.64	1.66139	0.00544171
IMZ28_RS06900		SufD family Fe-S cluster assembly protein && PF01458:Uncharacterized protein family (UPF0051)	6923.7	4173.9	1.65873	0.00771402
IMZ28_RS00120		efflux RND transporter periplasmic adaptor subunit && PF16576:Barrel-sandwich domain of CusB or HlyD membrane-fusion	828.293	499.303	1.65841	0.00879798
IMZ28_RS07715		thioredoxin domain-containing protein && PF13462:Thioredoxin	2935.46	1769.86	1.65838	0.00328212
IMZ28_RS09410	napA	nitrate reductase catalytic subunit NapA && PF01568:Molydopterin dinucleotide binding domain|PF00384:Molybdopterin oxidoreductase|PF04879:Molybdopterin oxidoreductase Fe4S4 domain	51772.5	31230.3	1.65776	0.00573498
IMZ28_RS04520	pckA	phosphoenolpyruvate carboxykinase (ATP) && PF01293:Phosphoenolpyruvate carboxykinase	8362.97	5055.47	1.65425	0.00927871
IMZ28_RS07165		4Fe-4S dicluster domain-containing protein && PF13247:4Fe-4S dicluster domain	569.746	344.512	1.65393	0.00178312
IMZ28_RS06910		DUF59 domain-containing protein && PF01883:Domain of unknown function DUF59	2550.28	1544.02	1.65173	0.00160931
IMZ28_RS02115		VWA domain-containing protein && PF13519:von Willebrand factor type A domain	1239.03	752.817	1.64552	0.0126583
IMZ28_RS09825		pyruvate ferredoxin oxidoreductase && PF02775:Thiamine pyrophosphate enzyme, C-terminal TPP binding domain	13616.6	8325.65	1.63548	0.00144263
IMZ28_RS09225	glnA	type I glutamate--ammonia ligase && PF03951:Glutamine synthetase, beta-Grasp domain|PF00120:Glutamine synthetase, catalytic domain	11832.2	7236.55	1.63505	0.0102457
IMZ28_RS06985		saccharopine dehydrogenase family protein && PF16653:Saccharopine dehydrogenase C-terminal domain|PF03435:Saccharopine dehydrogenase NADP binding domain	1584.72	970.835	1.63232	0.00475748
IMZ28_RS10095		alpha/beta hydrolase && PF06821:Serine hydrolase	362.887	222.837	1.62897	0.0165935
IMZ28_RS09855		ABC transporter permease && PF00528:Binding-protein-dependent transport system inner membrane component	408.229	250.705	1.62862	0.0131803
IMZ28_RS03795	gmd	GDP-mannose 4%2C6-dehydratase && PF16363:GDP-mannose 4,6 dehydratase	849.471	522.739	1.62475	0.026043
IMZ28_RS04325		CDP-alcohol phosphatidyltransferase family protein && PF01066:CDP-alcohol phosphatidyltransferase	514.271	317.051	1.62104	0.0159988
IMZ28_RS05200		S41 family peptidase && PF13180:PDZ domain|PF03572:Peptidase family S41	4725.44	2932.54	1.61125	0.0229307
IMZ28_RS03100		RidA family protein && PF01042:Endoribonuclease L-PSP	1032.77	641.299	1.61092	0.00504142
IMZ28_RS00215		hypothetical protein && PF02706:Chain length determinant protein	772.783	480.101	1.60909	0.0364325
IMZ28_RS02100		DUF58 domain-containing protein && PF01882:Protein of unknown function DUF58	1182.99	735.373	1.60852	0.0334348
IMZ28_RS09985		MFS transporter && PF07690:Major Facilitator Superfamily	2134	1326.97	1.60793	0.00838073
IMZ28_RS01175	nuoK	NADH-quinone oxidoreductase subunit NuoK && PF00420:NADH-ubiquinone/plastoquinone oxidoreductase chain 4L	1368.04	853.529	1.60249	0.0102457
IMZ28_RS01170		NADH-quinone oxidoreductase subunit J && PF00499:NADH-ubiquinone/plastoquinone oxidoreductase chain 6	2949.4	1840.55	1.60233	0.0147284
IMZ28_RS10065		FAD-dependent oxidoreductase && PF02910:Fumarate reductase flavoprotein C-term|PF00890:FAD binding domain	2890.5	1808.87	1.59772	0.0327745
IMZ28_RS01100		PTS transporter subunit EIIC && PF00367:phosphotransferase system, EIIB|PF02378:Phosphotransferase system, EIIC	681.799	426.974	1.59658	0.025572
IMZ28_RS03090		HesA/MoeB/ThiF family protein && PF00899:ThiF family	682.038	427.79	1.59418	0.00452451
IMZ28_RS10355		Gfo/Idh/MocA family oxidoreductase && PF02894:Oxidoreductase family, C-terminal alpha/beta domain|PF01408:Oxidoreductase family, NAD-binding Rossmann fold	693.835	435.744	1.59198	0.00291902
IMZ28_RS04285		DUF2237 domain-containing protein && PF09996:Uncharacterized protein conserved in bacteria (DUF2237)	587.621	369.177	1.59068	0.0225528
IMZ28_RS02990	fbaA	class II fructose-bisphosphate aldolase && PF01116:Fructose-bisphosphate aldolase class-II	4236.03	2665.92	1.58883	0.00867638
IMZ28_RS01190	nuoN	NADH-quinone oxidoreductase subunit NuoN && PF00361:Proton-conducting membrane transporter	8015.56	5053.47	1.58612	0.0383483
IMZ28_RS09850		ABC transporter ATP-binding protein && PF07673:Protein of unknown function (DUF1602)|PF00005:ABC transporter	603.087	380.471	1.5852	0.0210184
IMZ28_RS07270		molybdopterin-dependent oxidoreductase && PF01568:Molydopterin dinucleotide binding domain|PF04879:Molybdopterin oxidoreductase Fe4S4 domain|PF00384:Molybdopterin oxidoreductase	668.371	422.086	1.58302	0.0193793
IMZ28_RS01585		gamma carbonic anhydrase family protein && PF00132:Bacterial transferase hexapeptide (six repeats)	611.628	386.21	1.58279	0.0245176
IMZ28_RS02490		glucose-6-phosphate isomerase && PF00342:Phosphoglucose isomerase	668.919	423.452	1.57996	0.00330054
IMZ28_RS08645		response regulator transcription factor && PF00486:Transcriptional regulatory protein, C terminal|PF00072:Response regulator receiver domain	4188.42	2662.42	1.57306	0.0239634
IMZ28_RS06745		glutamate synthase subunit beta && PF07992:Pyridine nucleotide-disulphide oxidoreductase|PF14691:Dihydroprymidine dehydrogenase domain II, 4Fe-4S cluster	1054.37	672.311	1.56877	0.0379178
IMZ28_RS10950		type II secretion system protein	891.27	568.254	1.56844	0.0254353
IMZ28_RS08315	thiE	thiamine phosphate synthase && PF02581:Thiamine monophosphate synthase/TENI	983.775	627.745	1.56651	0.0279059
IMZ28_RS00210		polysaccharide biosynthesis/export family protein && PF02563:Polysaccharide biosynthesis/export protein	454.285	289.958	1.56621	0.0270768
IMZ28_RS08175		histidine triad nucleotide-binding protein && PF01230:HIT domain	1376.75	882.556	1.56036	0.0157569
IMZ28_RS09390		nitrate reductase cytochrome c-type subunit && PF03892:Nitrate reductase cytochrome c-type subunit (NapB)	17204.7	11028.4	1.56003	0.00753686
IMZ28_RS01580		EI24 domain-containing protein && PF07264:Etoposide-induced protein 2.4 (EI24)	701.781	450	1.55932	0.00960105
IMZ28_RS02590	uvrC	excinuclease ABC subunit UvrC && PF01541:GIY-YIG catalytic domain|PF08459:UvrC Helix-hairpin-helix N-terminal	388.908	249.472	1.55924	0.0150326
IMZ28_RS09920		DUF4006 family protein && PF13179:Family of unknown function (DUF4006)	2205.71	1420.34	1.55283	0.0191801
IMZ28_RS07475		glycoside hydrolase family 9 protein && PF02927:N-terminal ig-like domain of cellulase|PF00759:Glycosyl hydrolase family 9	2850.53	1835.84	1.55251	0.0388436
IMZ28_RS08650		HAMP domain-containing histidine kinase && PF02518:Histidine kinase-, DNA gyrase B-, and HSP90-like ATPase|PF00672:HAMP domain	840.045	541.242	1.55165	0.0255511
IMZ28_RS07160	nrfD	polysulfide reductase NrfD && PF03916:Polysulphide reductase, NrfD	935.445	604.167	1.54849	0.0068735
IMZ28_RS02980		peptidylprolyl isomerase && PF00639:PPIC-type PPIASE domain	3960.34	2559.15	1.54763	0.0126514
IMZ28_RS06185		TRAP transporter substrate-binding protein && PF03480:Bacterial extracellular solute-binding protein, family 7	1335.43	865.651	1.54261	0.0039128
IMZ28_RS07170		molybdopterin-dependent oxidoreductase && PF00384:Molybdopterin oxidoreductase|PF01568:Molydopterin dinucleotide binding domain|PF04879:Molybdopterin oxidoreductase Fe4S4 domain	2236.26	1453.74	1.5383	0.00771402
IMZ28_RS04510		biotin/lipoyl-binding protein && PF00364:Biotin-requiring enzyme|PF02436:Conserved carboxylase domain|PF00682:HMGL-like	8013.48	5217.73	1.53584	0.0327745
IMZ28_RS09835		4Fe-4S dicluster domain-containing protein && PF14697:4Fe-4S dicluster domain	5228.86	3408.59	1.53397	0.00317536
IMZ28_RS03910		N-acetyl sugar amidotransferase && -	498.299	326.536	1.52682	0.0392935
IMZ28_RS05170	crcB	fluoride efflux transporter CrcB && PF02537:CrcB-like protein, Camphor Resistance (CrcB)	307.137	201.226	1.52636	0.0329365
IMZ28_RS02485		phosphomannomutase/phosphoglucomutase && PF02879:Phosphoglucomutase/phosphomannomutase, alpha/beta/alpha domain II|PF02880:Phosphoglucomutase/phosphomannomutase, alpha/beta/alpha domain III|PF02878:Phosphoglucomutase/phosphomannomutase, alpha/beta/alpha domain I|PF00408:Phosphoglucomutase/phosphomannomutase, C-terminal domain	1621.61	1064.05	1.52391	0.0245176
IMZ28_RS03740	hemE	uroporphyrinogen decarboxylase && PF01208:Uroporphyrinogen decarboxylase (URO-D)	3141.37	2061.21	1.52391	0.0440491
IMZ28_RS05750		CoB--CoM heterodisulfide reductase iron-sulfur subunit B family protein && PF02754:Cysteine-rich domain	4903.96	3221.73	1.52205	0.0469393
IMZ28_RS10840		STAS/SEC14 domain-containing protein && PF11964:SpoIIAA-like	1411.4	929.678	1.51776	0.0303469
IMZ28_RS10310		peptide-binding protein && PF02516:Oligosaccharyl transferase STT3 subunit	1627.64	1074.27	1.51495	0.0458894
IMZ28_RS06635		nickel-dependent hydrogenase large subunit && PF00374:Nickel-dependent hydrogenase	621.422	410.342	1.51399	0.0472686
IMZ28_RS08440		molybdopterin-dependent oxidoreductase && PF01568:Molydopterin dinucleotide binding domain|PF00384:Molybdopterin oxidoreductase|PF04879:Molybdopterin oxidoreductase Fe4S4 domain	24306.4	16069.3	1.51257	0.0240521
IMZ28_RS08880		tandem-95 repeat protein && PF16184:Cadherin-like|PF00082:Subtilase family	8602.06	5692.32	1.5111	0.0277136
IMZ28_RS04890		leucyl aminopeptidase && PF02789:Cytosol aminopeptidase family, N-terminal domain|PF00883:Cytosol aminopeptidase family, catalytic domain	4114.02	2725.06	1.50964	0.00753686
IMZ28_RS02565	lon	endopeptidase La && PF00004:ATPase family associated with various cellular activities (AAA)|PF02190:ATP-dependent protease La (LON) substrate-binding domain|PF05362:Lon protease (S16) C-terminal proteolytic domain	6909.87	4584.88	1.50701	0.0379178
IMZ28_RS02660		polyribonucleotide nucleotidyltransferase && PF03725:3' exoribonuclease family, domain 2|PF00575:S1 RNA binding domain|PF03726:Polyribonucleotide nucleotidyltransferase, RNA binding domain|PF01138:3' exoribonuclease family, domain 1|PF00013:KH domain	2942.42	1957.12	1.50344	0.0390988
IMZ28_RS09635		molybdopterin-dependent oxidoreductase && PF01568:Molydopterin dinucleotide binding domain|PF00384:Molybdopterin oxidoreductase|PF04879:Molybdopterin oxidoreductase Fe4S4 domain	4423.49	2950.79	1.499	0.00550885
IMZ28_RS08840		SPFH/Band 7/PHB domain protein && PF01145:SPFH domain / Band 7 family	1893.73	1264.35	1.49749	0.0319318
IMZ28_RS10305		aminotransferase class V-fold PLP-dependent enzyme && PF01041:DegT/DnrJ/EryC1/StrS aminotransferase family	576.904	385.536	1.49618	0.0191801
IMZ28_RS06640		DsrE family protein && PF02635:DsrE/DsrF-like family	500.624	335.432	1.4921	0.0210235
IMZ28_RS10575	soxY	thiosulfate oxidation carrier protein SoxY && PF13501:Sulfur oxidation protein SoxY	15548.4	10428.1	1.49099	0.030419
IMZ28_RS05320	acs	acetate--CoA ligase && PF00501:AMP-binding enzyme|PF13193:AMP-binding enzyme C-terminal domain|PF16177:Acetyl-coenzyme A synthetase N-terminus	1514.59	1016.42	1.48994	0.0491976
IMZ28_RS03095		hypothetical protein && -	601.066	404.598	1.48561	0.0269165
IMZ28_RS08310	thiD	bifunctional hydroxymethylpyrimidine kinase/phosphomethylpyrimidine kinase && PF08543:Phosphomethylpyrimidine kinase	651.432	438.662	1.48544	0.0270768
IMZ28_RS02880	coaBC	bifunctional phosphopantothenoylcysteine decarboxylase/phosphopantothenate--cysteine ligase CoaBC && PF04127:DNA / pantothenate metabolism flavoprotein|PF02441:Flavoprotein	1429.63	963.075	1.48425	0.037266
IMZ28_RS01810		CoA activase && PF01869:BadF/BadG/BcrA/BcrD ATPase family|PF09989:CoA enzyme activase uncharacterised domain (DUF2229)	881.18	594.467	1.48217	0.0437427
IMZ28_RS01155		NADH-quinone oxidoreductase subunit G && PF10588:NADH-ubiquinone oxidoreductase-G iron-sulfur binding region|PF13510:2Fe-2S iron-sulfur cluster binding domain	9296.81	6278.36	1.48072	0.049086
IMZ28_RS02460	gdhA	NADP-specific glutamate dehydrogenase && PF00208:Glutamate/Leucine/Phenylalanine/Valine dehydrogenase|PF02812:Glu/Leu/Phe/Val dehydrogenase, dimerisation domain	1712.36	1158.67	1.4777	0.00771402
IMZ28_RS05495		PDC sensor domain-containing protein && PF02743:Cache domain	1218.75	825.989	1.47523	0.0279059
IMZ28_RS10585	soxC	sulfite dehydrogenase && PF00174:Oxidoreductase molybdopterin binding domain|PF03404:Mo-co oxidoreductase dimerisation domain	25625.5	17379.7	1.47443	0.0255275
IMZ28_RS09785		cytochrome bc complex cytochrome b subunit && PF00032:Cytochrome b(C-terminal)/b6/petD|PF13631:Cytochrome b(N-terminal)/b6/petB	6225.97	4237.42	1.46932	0.0455224
IMZ28_RS02575		nitrate- and nitrite sensing domain-containing protein && PF08376:Nitrate and nitrite sensing|PF00072:Response regulator receiver domain|PF02518:Histidine kinase-, DNA gyrase B-, and HSP90-like ATPase|PF00512:His Kinase A (phospho-acceptor) domain	4863.92	3315.75	1.46694	0.0283987
IMZ28_RS09095		YaiO family outer membrane beta-barrel protein && -	1258.15	857.621	1.46667	0.0347413
IMZ28_RS01695		FAD-binding protein && PF02913:FAD linked oxidases, C-terminal domain|PF01565:FAD binding domain	1522.32	1039.16	1.46495	0.0496049
IMZ28_RS00015		CTP synthase && PF06418:CTP synthase N-terminus|PF00117:Glutamine amidotransferase class-I	2581.31	1772.46	1.45641	0.00831619
IMZ28_RS02580		Hpt domain-containing protein && -	2669.93	1834.14	1.45577	0.0349045
IMZ28_RS10775		VWA domain-containing protein && PF13519:von Willebrand factor type A domain	704.853	485.12	1.45271	0.0327745
IMZ28_RS08285		peptidoglycan-binding protein && PF01471:Putative peptidoglycan binding domain	2784.14	1917.89	1.4516	0.00837703
IMZ28_RS09335		trypsin-like peptidase domain-containing protein && PF13365:Trypsin-like peptidase domain|PF13180:PDZ domain	1678.84	1157.6	1.45003	0.0383724
IMZ28_RS01140		NADH-ubiquinone oxidoreductase subunit E family protein && PF16514:putative NADH-ubiquinone oxidoreductase chain E	1463.31	1010.74	1.44769	0.0352981
IMZ28_RS01090	nagA	N-acetylglucosamine-6-phosphate deacetylase && PF01979:Amidohydrolase family	547.897	378.452	1.44737	0.0469393
IMZ28_RS09020		carbonic anhydrase && PF00484:Carbonic anhydrase	526.526	363.979	1.44675	0.0445765
IMZ28_RS07995		5-oxoprolinase subunit PxpA && PF03746:LamB/YcsF family	655.377	454.096	1.44289	0.0293763
IMZ28_RS09780		cytochrome c1 && PF00034:Cytochrome c	4899.57	3398.28	1.44185	0.0443921
IMZ28_RS02090	mfd	transcription-repair coupling factor && PF00271:Helicase conserved C-terminal domain|PF03461:TRCF domain|PF02559:CarD-like/TRCF domain|PF00270:DEAD/DEAH box helicase	665.128	463.966	1.4338	0.0437427
IMZ28_RS00125		ABC transporter permease && PF02687:FtsX-like permease family|PF12704:MacB-like periplasmic core domain	460.509	321.875	1.43091	0.0484448
IMZ28_RS03820	pseB	UDP-N-acetylglucosamine 4%2C6-dehydratase (inverting) && PF02719:Polysaccharide biosynthesis protein	680.09	475.989	1.42841	0.0301586
IMZ28_RS00435		ribonucleoside-diphosphate reductase subunit alpha && PF02867:Ribonucleotide reductase, barrel domain|PF00317:Ribonucleotide reductase, all-alpha domain|PF03477:ATP cone domain	4710.94	3300.04	1.42752	0.0381586
IMZ28_RS00240		FIST C-terminal domain-containing protein && PF10442:FIST C domain|PF08495:FIST N domain	966.715	678.049	1.4258	0.045083
IMZ28_RS10600		DUF3373 family protein && PF11853:Protein of unknown function (DUF3373)	52260.1	36702.8	1.42387	0.00998042
IMZ28_RS09350		aldehyde dehydrogenase family protein && PF00171:Aldehyde dehydrogenase family	1646.54	1156.71	1.42335	0.0226056
IMZ28_RS03720		thioredoxin family protein && PF00085:Thioredoxin	1430.54	1005.34	1.42262	0.0364325
IMZ28_RS06190		c-type cytochrome && PF00034:Cytochrome c	1093.62	769.903	1.42027	0.0229307
IMZ28_RS02950	trpB	tryptophan synthase subunit beta && PF00291:Pyridoxal-phosphate dependent enzyme	2018.69	1432.99	1.40865	0.046249
IMZ28_RS08305		TonB-dependent receptor && PF07715:TonB-dependent Receptor Plug Domain|PF00593:TonB dependent receptor	2464.42	1766.17	1.39531	0.0424947
IMZ28_RS01980		transaldolase && PF00923:Transaldolase	2000.14	1460.87	1.36903	0.0378377
IMZ28_RS09240		PBP1A family penicillin-binding protein && PF00905:Penicillin binding protein transpeptidase domain|PF00912:Transglycosylase	1454.85	1066.62	1.36393	0.0376243
IMZ28_RS08000		molybdopterin-dependent oxidoreductase && PF00384:Molybdopterin oxidoreductase	1976.32	1454.51	1.35861	0.0398684
IMZ28_RS03550		type II secretion system F family protein	1265.06	934.793	1.35328	0.0229556
IMZ28_RS03245		pyrroline-5-carboxylate reductase && PF03807:NADP oxidoreductase coenzyme F420-dependent|PF14748:Pyrroline-5-carboxylate reductase dimerisation	2172.74	1618.23	1.34272	0.0434958

## Sheet: S0 vs Na2S2O3 down
Table S2-2. 218 differentially down-regulated transcripts in S0 oxidation vs Na2S2O3 oxidation.
Gene ID	Gene name	Genedescription	S0 oxidation	Na2S2O3 oxidation	FoldChange	padj
sRNA00035		-	110.269	997.401	-9.04044	0.00771402
IMZ28_RS05245		tRNA-Met && -	4.11421	27.4918	-6.59388	0.00939014
IMZ28_RS02670		tRNA-Leu && -	22.7291	142.128	-6.23682	1.27089e-05
sRNA00018		-	25.0488	146.87	-5.83156	2.89457e-08
IMZ28_RS00350		tRNA-His && -	276.443	1595.33	-5.77023	0.00654952
IMZ28_RS02255		tRNA-Met && -	39.5719	222.288	-5.60131	4.90407e-10
IMZ28_RS03020		tRNA-Val && -	4.48434	25.0179	-5.51746	0.0106903
IMZ28_RS03040		tRNA-Asp && -	13.3288	72.888	-5.45587	0.000657115
IMZ28_RS06880		tRNA-Gly && -	39.3264	209.607	-5.33161	5.40684e-08
IMZ28_RS00590		tRNA-Leu && -	25.8352	129.523	-5.01365	0.00144645
IMZ28_RS01055		tRNA-Glu && -	20.5213	101.406	-4.94317	5.53818e-05
IMZ28_RS07015		tRNA-Ile && -	9.56803	45.5126	-4.76434	0.000364521
IMZ28_RS07615		outer membrane beta-barrel protein && PF13505:Outer membrane protein beta-barrel domain	2042.72	9547.95	-4.67478	2.22859e-22
IMZ28_RS10200		tRNA-Thr && -	6.8794	32.358	-4.66433	0.0286211
IMZ28_RS03010		tRNA-Leu && -	37.0397	172.896	-4.65852	0.000208805
IMZ28_RS00365		tRNA-Leu && -	18.3873	84.0526	-4.57147	0.00167908
IMZ28_RS01325		tRNA-Phe && -	54.0815	245.997	-4.55389	5.8928e-08
IMZ28_RS03015		tRNA-Asp && -	44.5111	202.204	-4.53344	0.000658286
IMZ28_RS10205		tRNA-Gly && -	81.0373	367.45	-4.52895	2.32528e-05
IMZ28_RS05220		hypothetical protein && -	8.17708	35.6678	-4.37693	0.000984741
IMZ28_RS01220		tRNA-Arg && -	12.6557	54.4837	-4.29676	0.00167908
IMZ28_RS03760		tRNA-Asn && -	11.948	48.0724	-4.0625	0.00190296
IMZ28_RS00360		tRNA-Arg && -	16.9337	67.5844	-4.00368	0.0321097
IMZ28_RS00355		tRNA-Arg && -	26.4544	103.203	-3.91897	4.20739e-06
IMZ28_RS08590	soxH	MBL fold metallo-hydrolase && PF00753:Metallo-beta-lactamase superfamily	159.793	610.978	-3.83057	4.20365e-06
IMZ28_RS10745		tRNA-Val && -	8.56392	31.1388	-3.65013	0.00831619
IMZ28_RS04035		hypothetical protein && -	33.5102	120.033	-3.57179	0.0208231
IMZ28_RS05030		tRNA-Ser && -	7.80412	27.0427	-3.46968	0.0169564
sRNA00036		-	79.7199	274.825	-3.45636	0.000190765
IMZ28_RS05885		hypothetical protein && -	74.8029	257.811	-3.44228	0.00246471
IMZ28_RS00720		tRNA-Ser && -	9.91294	34.0635	-3.43494	0.0364325
sRNA00107		-	37.7599	128.242	-3.41277	3.36285e-05
sRNA00054		-	45.8748	155.811	-3.39443	0.00316488
IMZ28_RS10550		30S ribosomal protein S20 && PF01649:Ribosomal protein S20	392.225	1316.67	-3.35553	0.000331317
sRNA00004		-	698.249	2312.83	-3.31201	0.00370197
IMZ28_RS00580		tRNA-Ser && -	62.7762	204.723	-3.26025	0.000429637
IMZ28_RS04555		DUF2892 domain-containing protein && PF11127:Protein of unknown function (DUF2892)	47.9643	152.307	-3.17268	3.36285e-05
IMZ28_RS01890		hypothetical protein && -	74.8528	236.22	-3.15081	1.75934e-08
IMZ28_RS08585	soxW	thioredoxin family protein && PF13899:Thioredoxin-like	110.581	347.959	-3.14925	4.7439e-06
IMZ28_RS02750		helix-turn-helix domain-containing protein && PF13384:Homeodomain-like domain	42.1925	132.669	-3.14543	0.000479321
IMZ28_RS10210		tRNA-Tyr && -	85.2961	265.376	-3.11144	0.000721996
IMZ28_RS04985		cold-shock protein && PF00313:'Cold-shock' DNA-binding domain	5108.44	15601.1	-3.05391	1.01402e-05
IMZ28_RS05645		transposase && PF01797:Transposase IS200 like	39.2185	118.871	-3.02477	0.00393884
IMZ28_RS08595		OprD family outer membrane porin && PF03573:outer membrane porin, OprD family	1270.63	3841.82	-3.02436	0.000368379
sRNA00009		-	31.4921	92.9171	-2.96782	0.0035838
IMZ28_RS09325		hypothetical protein && -	29.4399	87.4816	-2.96206	0.00061998
IMZ28_RS02730	rpsO	30S ribosomal protein S15 && PF00312:Ribosomal protein S15	282.915	837.721	-2.96089	0.000108807
Novel00018		PF04461:Protein of unknown function (DUF520)	59.1864	174.833	-2.96075	0.000768561
Novel00015		PF08267:Cobalamin-independent synthase, N-terminal domain	44.5159	129.463	-2.90107	0.000296598
IMZ28_RS00280		hypothetical protein && -	67.8656	194.567	-2.86642	4.82318e-05
IMZ28_RS09990		tRNA-Pro && -	19.1516	54.3616	-2.85449	0.0252286
IMZ28_RS02675		HU family DNA-binding protein && PF00216:Bacterial DNA-binding protein	1953.01	5547.42	-2.84022	0.00258436
Novel00017		PF00044:Glyceraldehyde 3-phosphate dehydrogenase, NAD binding domain	130.056	366.368	-2.81652	8.50959e-05
IMZ28_RS03270		rubredoxin && PF00301:Rubredoxin	1168.21	3235.33	-2.7694	0.00771402
IMZ28_RS10005		hypothetical protein && -	125.291	345.684	-2.75664	0.00061998
sRNA00087		-	204.316	559.946	-2.73761	0.00018239
IMZ28_RS01520	acpP	acyl carrier protein && PF00550:Phosphopantetheine attachment site	441.568	1208.2	-2.73498	0.003653
sRNA00048		-	100.778	274.467	-2.72486	8.19187e-05
IMZ28_RS01560		50S ribosomal protein L28 && PF00830:Ribosomal L28 family	449.134	1206.18	-2.68456	0.0032071
IMZ28_RS03185		MotA/TolQ/ExbB proton channel family protein && PF01618:MotA/TolQ/ExbB proton channel family	81.0046	216.011	-2.67632	9.50308e-05
IMZ28_RS09750		DUF4492 domain-containing protein && PF14899:Domain of unknown function (DUF4492)	29.1447	77.079	-2.66085	0.0220334
IMZ28_RS00660		- && PF01527:Transposase|PF00665:Integrase core domain	28.2412	75.3972	-2.65635	0.0446607
IMZ28_RS05890		hypothetical protein && -	16.4336	42.9837	-2.60442	0.0266383
IMZ28_RS09730	tsaA	tRNA (N6-threonylcarbamoyladenosine(37)-N6)-methyltransferase TrmO && PF01980:Uncharacterised protein family UPF0066	107.249	277.957	-2.58796	3.2276e-05
IMZ28_RS01545		YdcH family protein && PF04325:Protein of unknown function (DUF465)	135.149	344.705	-2.54742	0.00475748
IMZ28_RS00035		cytochrome b/b6 domain-containing protein && PF00033:Cytochrome b/b6/petB|PF09626:Dihaem cytochrome c	63.1735	160.154	-2.53819	0.00034156
IMZ28_RS09640		hypothetical protein && -	445.196	1118.39	-2.51152	0.0266383
IMZ28_RS05140		hypothetical protein && -	89.8454	225.765	-2.50802	0.0159988
IMZ28_RS10120		hypothetical protein && -	134.679	331.286	-2.45694	0.00193851
IMZ28_RS00735	rpsJ	30S ribosomal protein S10 && PF00338:Ribosomal protein S10p/S20e	874.936	2141.93	-2.44742	1.44196e-09
IMZ28_RS01725		hypothetical protein && -	65.9978	161.529	-2.44239	0.00906685
IMZ28_RS09725		NifU family protein && PF01106:NifU-like domain	77.1374	188.439	-2.43621	0.00023568
IMZ28_RS04980		cytochrome c && PF13442:Cytochrome C oxidase, cbb3-type, subunit III	21.0649	50.4559	-2.40212	0.0285378
IMZ28_RS05700		CDP-alcohol phosphatidyltransferase family protein && PF01066:CDP-alcohol phosphatidyltransferase	38.5376	90.1777	-2.34664	0.00649907
IMZ28_RS10900		hypothetical protein && PF13541:Subunit ChlI of Mg-chelatase	22.4726	52.3791	-2.33535	0.046114
IMZ28_RS07960	acpS	holo-ACP synthase && PF01648:4'-phosphopantetheinyl transferase superfamily	41.5191	95.9276	-2.31229	0.0123028
IMZ28_RS01885		twin-arginine translocation signal domain-containing protein && -	50.9082	117.723	-2.30386	0.00195322
IMZ28_RS07600		hypothetical protein && -	530.772	1221.95	-2.30221	0.00753686
IMZ28_RS10125		hypothetical protein && -	110.589	253.129	-2.29114	0.00034156
IMZ28_RS04055		RNA-binding S4 domain-containing protein && PF01479:S4 domain	106.439	244.336	-2.28943	0.00939014
IMZ28_RS06510		hypothetical protein && -	286.624	651.537	-2.27203	0.00333073
IMZ28_RS01655		prepilin-type N-terminal cleavage/methylation domain-containing protein && PF13544:Type IV pilin N-term methylation site GFxxxE	184.353	417.645	-2.26377	0.0263865
sRNA00060		-	148.141	332.985	-2.24991	0.0472686
IMZ28_RS08920		hypothetical protein && -	63.2272	142.106	-2.24167	0.00695689
IMZ28_RS07250		heavy-metal-associated domain-containing protein && PF00403:Heavy-metal-associated domain	21.1483	47.4239	-2.22861	0.0437427
IMZ28_RS09170		sel1 repeat family protein && -	194.602	428.772	-2.2	0.00393884
IMZ28_RS05505		hypothetical protein && -	111.052	244.436	-2.19799	0.001298
IMZ28_RS09355		hypothetical protein && -	27.7085	60.3489	-2.18112	0.02669
IMZ28_RS05160		hypothetical protein && -	277.908	605.414	-2.17994	0.000347742
IMZ28_RS05790		hypothetical protein && -	87.9877	192.013	-2.17974	0.00070028
IMZ28_RS00505		hypothetical protein && -	2020.33	4401.29	-2.17856	0.0211693
IMZ28_RS08435		molecular chaperone TorD family protein && PF02613:Nitrate reductase delta subunit	242.444	527.621	-2.17504	0.000676698
IMZ28_RS08580	dsrE	DsrE family protein && PF02635:DsrE/DsrF-like family	103.002	223.486	-2.17218	0.000493139
IMZ28_RS00045		hypothetical protein && -	35.8151	77.6396	-2.15713	0.0159988
IMZ28_RS03375		3-isopropylmalate dehydratase small subunit && PF00694:Aconitase C-terminal domain	120.51	260.159	-2.15674	0.000658286
IMZ28_RS04075		TIGR02757 family protein && PF09674:Protein of unknown function (DUF2400)	112.622	242.557	-2.15051	0.000456675
IMZ28_RS09155	rimM	16S rRNA processing protein RimM && PF01782:RimM N-terminal domain	394.108	846.398	-2.14937	1.1335e-05
IMZ28_RS04085		hypothetical protein && -	249.854	535.041	-2.1395	0.0229167
IMZ28_RS07420	accC	acetyl-CoA carboxylase biotin carboxylase subunit && PF00289:Carbamoyl-phosphate synthase L chain, N-terminal domain|PF02785:Biotin carboxylase C-terminal domain|PF02786:Carbamoyl-phosphate synthase L chain, ATP binding domain	238.507	504.885	-2.11744	0.00131056
sRNA00028		-	107.144	225.68	-2.10694	0.00502185
IMZ28_RS09735		NifB/NifX family molybdenum-iron cluster-binding protein && PF02579:Dinitrogenase iron-molybdenum cofactor	118.527	248.281	-2.09303	0.00527186
IMZ28_RS01280		hypothetical protein && -	218.007	456.265	-2.09134	0.0142746
IMZ28_RS06620		hypothetical protein && -	161.573	337.653	-2.08958	0.00148121
IMZ28_RS02145		YfhL family 4Fe-4S dicluster ferredoxin && PF13237:4Fe-4S dicluster domain	313.552	655.378	-2.08942	0.00511985
IMZ28_RS04140	rnpA	ribonuclease P protein component && PF00825:Ribonuclease P	293.192	608.09	-2.076	3.12798e-05
IMZ28_RS06305	ybeY	rRNA maturation RNase YbeY && PF02130:Uncharacterized protein family UPF0054	69.1973	143.41	-2.0747	0.0051828
IMZ28_RS07760		hypothetical protein && -	115.972	240.92	-2.07387	0.00862691
IMZ28_RS01875		hypothetical protein && PF13385:Concanavalin A-like lectin/glucanases superfamily	1028.89	2133.86	-2.07344	0.000139722
IMZ28_RS02995		1-aminocyclopropane-1-carboxylate deaminase/D-cysteine desulfhydrase && -	139.262	288.279	-2.06985	0.00190296
sRNA00023		-	125.376	259.329	-2.06971	0.00300687
IMZ28_RS01600		hypothetical protein && -	159.715	330.216	-2.06569	0.0205183
IMZ28_RS03135		biotin--[acetyl-CoA-carboxylase] ligase && PF03099:Biotin/lipoate A/B protein ligase family	233.862	481.541	-2.05841	0.00203506
IMZ28_RS03120	obgE	GTPase ObgE && PF01018:GTP1/OBG|PF01926:50S ribosome-binding GTPase	521.882	1074.1	-2.0577	0.00114324
IMZ28_RS05070		DoxX family protein && PF07681:DoxX	1175.26	2416.49	-2.05646	0.021769
IMZ28_RS03195		TonB C-terminal domain-containing protein && PF13103:TonB C terminal	70.403	145.023	-2.05611	0.00574421
IMZ28_RS08480	gatC	Asp-tRNA(Asn)/Glu-tRNA(Gln) amidotransferase subunit GatC && PF02686:Glu-tRNAGln amidotransferase C subunit	295.52	606.936	-2.05273	0.000162836
IMZ28_RS05710		hypothetical protein && -	600.943	1229.73	-2.04577	8.47488e-07
IMZ28_RS05210		cytochrome C oxidase subunit II && -	43.9609	89.4988	-2.0428	0.021192
IMZ28_RS03265		restriction endonuclease && PF04471:Restriction endonuclease	82.1157	167.412	-2.03345	0.0159414
Novel00007		PF00216:Bacterial DNA-binding protein	114.446	232.562	-2.0322	0.0191871
IMZ28_RS08355		hypothetical protein && -	124.533	253.355	-2.02942	0.00280022
IMZ28_RS01995	pth	aminoacyl-tRNA hydrolase && PF01195:Peptidyl-tRNA hydrolase	291.013	586.453	-2.01548	4.21727e-05
IMZ28_RS04760		ComF family protein && -	291.435	586.784	-2.01224	0.000349384
IMZ28_RS01730		hypothetical protein && -	89.1372	177.484	-1.98941	0.00654952
IMZ28_RS08520		DUF1882 domain-containing protein && PF08966:Domain of unknown function (DUF1882)	47.7384	94.7543	-1.98892	0.0376075
IMZ28_RS06550		hypothetical protein && -	73.6093	146.003	-1.97877	0.0172766
IMZ28_RS05065		MBL fold metallo-hydrolase && PF12706:Beta-lactamase superfamily domain	4867.15	9602.36	-1.97303	0.0120635
IMZ28_RS09720		c-type cytochrome && PF13442:Cytochrome C oxidase, cbb3-type, subunit III	89.7272	176.681	-1.97086	0.00232667
IMZ28_RS06435		paraquat-inducible protein A && PF04403:Paraquat-inducible protein A	43.5679	85.4655	-1.9578	0.0170953
IMZ28_RS03420		methyltransferase && PF05175:Methyltransferase small domain	185.672	362.904	-1.95458	0.00034156
Novel00003		-	611.67	1186.59	-1.94017	0.00839715
IMZ28_RS01870	ribA	GTP cyclohydrolase II && PF00925:GTP cyclohydrolase II	219.193	424.836	-1.9376	0.000654415
IMZ28_RS10475		hypothetical protein && -	84.0398	162.632	-1.93653	0.00669418
IMZ28_RS07950		1-acyl-sn-glycerol-3-phosphate acyltransferase && PF01553:Acyltransferase	96.0027	185.69	-1.93191	0.00538412
IMZ28_RS06145		hypothetical protein && -	62.2377	119.73	-1.92447	0.00704956
IMZ28_RS00875	rplQ	50S ribosomal protein L17 && PF01196:Ribosomal protein L17	2054.26	3952.53	-1.9242	8.31904e-06
IMZ28_RS08465	dapE	succinyl-diaminopimelate desuccinylase && PF01546:Peptidase family M20/M25/M40|PF07687:Peptidase dimerisation domain	1480.97	2834.66	-1.91402	0.006945
IMZ28_RS10635	secG	preprotein translocase subunit SecG && PF03840:Preprotein translocase SecG subunit	285.903	546.95	-1.91188	0.000745692
IMZ28_RS02140		Ppx/GppA family phosphatase && PF02541:Ppx/GppA phosphatase family	402.427	766.207	-1.90472	0.0032071
IMZ28_RS08695		DNA polymerase III subunit delta' && PF13177:DNA polymerase III, delta subunit	149.096	283.904	-1.9027	0.00315974
IMZ28_RS05035		DNA polymerase IV && PF00817:impB/mucB/samB family	47.0481	89.3942	-1.8962	0.018226
IMZ28_RS01945		hypothetical protein && -	157.761	298.231	-1.89154	0.000504019
IMZ28_RS10260		hypothetical protein && PF04324:BFD-like [2Fe-2S] binding domain	106.324	201.328	-1.89016	0.0145224
IMZ28_RS09360		hypothetical protein && -	81.015	153.113	-1.88998	0.0159757
IMZ28_RS07500		type II toxin-antitoxin system RelE/ParE family toxin && PF05973:Phage derived protein Gp49-like (DUF891)	274.828	519.299	-1.88965	0.025169
IMZ28_RS04525		AMP-binding protein && PF00501:AMP-binding enzyme	2665.69	5013.89	-1.88107	0.0441864
IMZ28_RS09165	rpsP	30S ribosomal protein S16 && PF00886:Ribosomal protein S16	1013.43	1894.7	-1.86914	0.000676698
IMZ28_RS10180	secE	preprotein translocase subunit SecE && PF00584:SecE/Sec61-gamma subunits of protein translocation complex	257.347	477.718	-1.85793	0.00387739
IMZ28_RS06430		paraquat-inducible protein A && PF04403:Paraquat-inducible protein A	132.992	247.524	-1.85787	0.0155
IMZ28_RS01910		hypothetical protein && PF13537:Glutamine amidotransferase domain|PF00733:Asparagine synthase	370.751	689.172	-1.85762	0.0476224
IMZ28_RS02725		Rrf2 family transcriptional regulator && PF02082:Transcriptional regulator	185.167	343.581	-1.85651	0.00633992
IMZ28_RS08805		TlpA family protein disulfide reductase && PF13905:Thioredoxin-like	1144.26	2122.06	-1.85482	0.0356907
IMZ28_RS09160		KH domain-containing protein && PF13083:KH domain	368.928	680.854	-1.84751	0.00960689
IMZ28_RS08710		RNA pyrophosphohydrolase && PF00293:NUDIX domain	255.75	472.849	-1.84721	0.0493885
IMZ28_RS10480		L%2CD-transpeptidase && PF03734:L,D-transpeptidase catalytic domain	276.016	506.709	-1.83688	0.00192899
IMZ28_RS00455		GGDEF domain-containing protein && PF00990:Diguanylate cyclase, GGDEF domain	596.805	1086.18	-1.81977	0.0143062
IMZ28_RS02855		c-type cytochrome && PF00034:Cytochrome c	53.3958	97.0018	-1.8165	0.0364325
IMZ28_RS10000		polyprenyl synthetase family protein && PF00348:Polyprenyl synthetase	269.861	489.966	-1.81503	0.000310152
IMZ28_RS04240		alpha/beta hydrolase && PF00561:alpha/beta hydrolase fold	291.75	525.956	-1.80312	0.00335458
IMZ28_RS01415		energy transducer TonB && PF03544:Gram-negative bacterial TonB protein C-terminal	62.8074	113.283	-1.80255	0.0462021
IMZ28_RS06555		hypothetical protein && PF13435:Cytochrome c554 and c-prime	117.282	210.281	-1.79214	0.0261574
IMZ28_RS00850	rpmJ	50S ribosomal protein L36 && PF00444:Ribosomal protein L36	293.633	524.252	-1.78649	0.00831808
IMZ28_RS03260		hypothetical protein && -	881.737	1573.58	-1.78476	9.50655e-05
IMZ28_RS04725		DUF2062 domain-containing protein && PF09835:Uncharacterized protein conserved in bacteria (DUF2062)	117.771	209.552	-1.77846	0.00839715
IMZ28_RS10190	rpmG	50S ribosomal protein L33 && PF00471:Ribosomal protein L33	277.898	493.756	-1.77777	0.00133728
IMZ28_RS04495		undecaprenyl-diphosphate phosphatase && PF02673:Bacitracin resistance protein BacA	309.237	549.635	-1.77641	0.00475748
IMZ28_RS02350		sulfotransferase && PF00685:Sulfotransferase domain	91.6035	161.771	-1.76346	0.0469393
IMZ28_RS07240		transglutaminase domain-containing protein && PF01841:Transglutaminase-like superfamily	142.524	249.684	-1.75342	0.00734274
IMZ28_RS02220	ribD	bifunctional diaminohydroxyphosphoribosylaminopyrimidine deaminase/5-amino-6-(5-phosphoribosylamino)uracil reductase RibD && PF00383:Cytidine and deoxycytidylate deaminase zinc-binding region|PF01872:RibD C-terminal domain	403.256	706.924	-1.75271	0.00874307
IMZ28_RS04700	folK	2-amino-4-hydroxy-6-hydroxymethyldihydropteridine diphosphokinase && PF01288:7,8-dihydro-6-hydroxymethylpterin-pyrophosphokinase (HPPK)	173.108	302.195	-1.74693	0.00215451
IMZ28_RS01940		hypothetical protein && -	113.406	196.645	-1.73494	0.00998042
IMZ28_RS05145		hypothetical protein && -	1426.86	2454.39	-1.71987	0.0443921
Novel00010		-	393.08	672.787	-1.71131	0.00474695
IMZ28_RS09145	rplS	50S ribosomal protein L19 && PF01245:Ribosomal protein L19	610.4	1040.33	-1.70383	0.000815151
Novel00001		-	128.006	218.208	-1.70244	0.0332414
IMZ28_RS04395		sulfite exporter TauE/SafE family protein && PF01925:Sulfite exporter TauE/SafE	249.065	423.216	-1.69884	0.00232667
IMZ28_RS02720		phosphoesterase && PF02272:DHHA1 domain	226.917	383.599	-1.69106	0.00374302
IMZ28_RS01375	exbB	TonB-system energizer ExbB && PF01618:MotA/TolQ/ExbB proton channel family	289.93	489.806	-1.68825	0.00857446
IMZ28_RS02000		LptF/LptG family permease && PF03739:Predicted permease YjgP/YjgQ family	109.18	184.074	-1.68466	0.0123028
IMZ28_RS02665		F0F1 ATP synthase subunit C && PF00137:ATP synthase subunit C	1614.6	2714.99	-1.68132	0.00856871
IMZ28_RS09195		hypothetical protein && PF02591:C4-type zinc ribbon domain	488.21	817.308	-1.67307	0.0191515
IMZ28_RS08770		MFS transporter && PF07690:Major Facilitator Superfamily	556.68	930.619	-1.67162	0.00175238
IMZ28_RS01895		ABC transporter ATP-binding protein && PF00005:ABC transporter|PF00664:ABC transporter transmembrane region	250.955	416.991	-1.66118	0.00555138
IMZ28_RS05330		uracil-DNA glycosylase && PF03167:Uracil DNA glycosylase superfamily	257.476	422.749	-1.64048	0.00769565
IMZ28_RS03150		F0F1 ATP synthase subunit B' && PF00430:ATP synthase B/B' CF(0)	1154.29	1882.95	-1.63126	0.00906685
IMZ28_RS02225	ubiE	bifunctional demethylmenaquinone methyltransferase/2-methoxy-6-polyprenyl-1%2C4-benzoquinol methylase UbiE && PF01209:ubiE/COQ5 methyltransferase family	216.989	351.826	-1.62108	0.0191871
IMZ28_RS02955		DUF1653 domain-containing protein && PF07866:Protein of unknown function (DUF1653)	131.244	211.677	-1.61284	0.0417166
IMZ28_RS03105	rplU	50S ribosomal protein L21 && PF00829:Ribosomal prokaryotic L21 protein	1242.95	2001.63	-1.61036	0.00344626
IMZ28_RS04435	greA	transcription elongation factor GreA && PF01272:Transcription elongation factor, GreA/GreB, C-term|PF03449:Transcription elongation factor, N-terminal	284.488	457.008	-1.6049	0.0469393
IMZ28_RS08180		ABC-F family ATP-binding cassette domain-containing protein && PF12848:ABC transporter|PF00005:ABC transporter	575.544	922.219	-1.60318	0.0392935
IMZ28_RS10265		helix-turn-helix domain-containing protein && PF07022:Bacteriophage CI repressor helix-turn-helix domain|PF00717:Peptidase S24-like	240.629	385.696	-1.60181	0.0172766
IMZ28_RS08425		hypothetical protein && -	151.709	242.468	-1.59926	0.0329365
IMZ28_RS09130	smpB	SsrA-binding protein SmpB && PF01668:SmpB protein	138.738	220.711	-1.58881	0.0329365
Novel00016		-	1148.04	1820.84	-1.58567	0.0484514
IMZ28_RS03125	proB	glutamate 5-kinase && PF00696:Amino acid kinase family	653.147	1031.58	-1.57974	0.0456923
IMZ28_RS02200		DUF448 domain-containing protein && PF04296:Protein of unknown function (DUF448)	252.472	397.753	-1.57587	0.00906685
IMZ28_RS07910		response regulator transcription factor && PF00486:Transcriptional regulatory protein, C terminal	953.741	1501.99	-1.57488	0.00291902
IMZ28_RS07765		DEAD/DEAH box helicase && PF00271:Helicase conserved C-terminal domain|PF00270:DEAD/DEAH box helicase	2032.32	3193.66	-1.57157	0.0394938
IMZ28_RS09630		YraN family protein && PF02021:Uncharacterised protein family UPF0102	137.042	214.338	-1.56501	0.0472686
IMZ28_RS09470		phosphatase PAP2 family protein && PF01569:PAP2 superfamily	374.975	586.232	-1.5636	0.0469393
IMZ28_RS05860		methyltransferase domain-containing protein && PF08241:Methyltransferase domain	741.687	1156.74	-1.56008	0.0394286
IMZ28_RS03320		DNA-directed RNA polymerase subunit omega && PF01192:RNA polymerase Rpb6	444.133	691.718	-1.55733	0.0494992
IMZ28_RS07895		ferritin-like domain-containing protein && PF04305:Protein of unknown function (DUF455)	387.588	603.135	-1.55663	0.0409795
IMZ28_RS01880		hypothetical protein && -	503.816	779.259	-1.54649	0.0463827
IMZ28_RS06560		hypothetical protein && -	501.916	767.66	-1.52979	0.00775028
IMZ28_RS07905		thioesterase && PF03061:Thioesterase superfamily	316.792	479.34	-1.51267	0.0270768
IMZ28_RS03390		tRNA (cytidine(34)-2'-O)-methyltransferase && PF00588:SpoU rRNA Methylase family	132.243	198.925	-1.50455	0.0481137
IMZ28_RS03455		tetratricopeptide repeat protein && PF13414:TPR repeat	307.273	460.315	-1.49738	0.0364325
IMZ28_RS03325		bifunctional (p)ppGpp synthetase/guanosine-3'%2C5'-bis(diphosphate) 3'-pyrophosphohydrolase && PF04607:Region found in RelA / SpoT proteins|PF13328:HD domain|PF02824:TGS domain	1280.73	1895.67	-1.48015	0.0497235
IMZ28_RS02065		YmdB family metallophosphoesterase && PF13277:YmdB-like protein	505.525	746.797	-1.47723	0.0182337
IMZ28_RS09670	rsmI	16S rRNA (cytidine(1402)-2'-O)-methyltransferase && PF00590:Tetrapyrrole (Corrin/Porphyrin) Methylases	587.971	858.417	-1.45984	0.0472686
IMZ28_RS07580		alpha/beta hydrolase && PF12697:Alpha/beta hydrolase family	478.362	697.062	-1.4576	0.03999
IMZ28_RS02790		DUF1538 domain-containing protein && PF07556:Protein of unknown function (DUF1538)	234.613	340.54	-1.4525	0.0424947
IMZ28_RS08510		cation:proton antiporter && PF00999:Sodium/hydrogen exchanger family	1122.32	1617.82	-1.44125	0.026024
IMZ28_RS05755		patatin-like phospholipase family protein && PF01734:Patatin-like phospholipase	483.997	691.441	-1.42805	0.0422721
IMZ28_RS01935		rhomboid family intramembrane serine protease && PF01694:Rhomboid family	490.243	690.569	-1.40835	0.0456923
IMZ28_RS00860	rpsK	30S ribosomal protein S11 && PF00411:Ribosomal protein S11	2270.61	3172.13	-1.39709	0.0365147
IMZ28_RS02195	thrB	homoserine kinase && PF08544:GHMP kinases C terminal|PF00288:GHMP kinases N terminal domain	739.495	1007.58	-1.36221	0.047553

## Sheet: S0 vs NaNO3 UP
Table S2-3. 533 differentially up-expressed transcripts in S0 reduction vs NaNO3 reduction.
Gene ID	Gene name	Genedescription	S0 reduction	NaNO3 reduction	FoldChange	padj
IMZ28_RS00180		mannose-1-phosphate guanylyltransferase/mannose-6-phosphate isomerase && PF01050:Mannose-6-phosphate isomerase|PF00483:Nucleotidyl transferase	12003.3	312.035	38.4704	4.82785e-25
IMZ28_RS00185		nucleotidyltransferase family protein && PF00483:Nucleotidyl transferase	12272.2	350.619	35.0041	1.93565e-18
sRNA00003		-	1699.44	61.1826	27.7892	2.54333e-13
IMZ28_RS00195		glycosyltransferase family 4 protein && PF13439:Glycosyltransferase Family 4|PF00534:Glycosyl transferases group 1	2703.89	124.109	21.7909	1.41065e-31
IMZ28_RS04475		4Fe-4S binding protein && PF12801:4Fe-4S binding domain	1033.79	56.2245	18.3821	5.51194e-14
IMZ28_RS00190		polysaccharide biosynthesis C-terminal domain-containing protein && PF14667:Polysaccharide biosynthesis C-terminal domain	1638.77	103.155	15.8817	2.72632e-40
IMZ28_RS00170		hypothetical protein && -	2616.31	168.77	15.4981	9.39473e-41
IMZ28_RS00245		glycosyltransferase family 4 protein && PF13439:Glycosyltransferase Family 4|PF00534:Glycosyl transferases group 1	4751.76	310.924	15.2827	6.64395e-35
IMZ28_RS00165		polysaccharide deacetylase family protein && PF01522:Polysaccharide deacetylase	1705.43	115.31	14.7819	5.29681e-51
IMZ28_RS00160		glycosyltransferase && PF00535:Glycosyl transferase family 2	1729.36	121.105	14.2783	1.65873e-42
IMZ28_RS00250		exopolysaccharide biosynthesis polyprenyl glycosylphosphotransferase && PF02397:Bacterial sugar transferase|PF03808:Glycosyl transferase WecB/TagA/CpsF family	13204.9	1035.52	12.7522	4.43249e-16
IMZ28_RS00225		glycosyltransferase && PF13692:Glycosyl transferases group 1|PF13579:Glycosyl transferase 4-like domain|PF00534:Glycosyl transferases group 1	6395.88	662.539	9.6535	4.1081e-28
IMZ28_RS06525		efflux RND transporter permease subunit && PF00873:AcrB/AcrD/AcrF family	1690.7	175.397	9.63704	1.70694e-09
IMZ28_RS00560		TRAP transporter permease && PF11874:Domain of unknown function (DUF3394)|PF06808:Tripartite ATP-independent periplasmic transporter, DctM component	16001.6	1758.72	9.09856	1.38471e-11
IMZ28_RS00230		phosphomannomutase/phosphoglucomutase && PF02879:Phosphoglucomutase/phosphomannomutase, alpha/beta/alpha domain II|PF00408:Phosphoglucomutase/phosphomannomutase, C-terminal domain|PF02880:Phosphoglucomutase/phosphomannomutase, alpha/beta/alpha domain III|PF02878:Phosphoglucomutase/phosphomannomutase, alpha/beta/alpha domain I	2879.77	316.716	9.09298	4.70867e-17
IMZ28_RS00555		TAXI family TRAP transporter solute-binding subunit && PF16868:NMT1-like family	13412.6	1494.59	8.97426	1.32926e-13
IMZ28_RS00265		AAA family ATPase && PF00485:Phosphoribulokinase / Uridine kinase family	1898.62	218.984	8.67082	5.50271e-06
IMZ28_RS00260		hypothetical protein && PF00132:Bacterial transferase hexapeptide (six repeats)	3342.65	398.534	8.38791	2.41181e-08
IMZ28_RS00175		glycosyltransferase family 4 protein && PF00534:Glycosyl transferases group 1	7540.73	900.37	8.37462	5.97274e-25
IMZ28_RS06520		efflux RND transporter periplasmic adaptor subunit && PF16576:Barrel-sandwich domain of CusB or HlyD membrane-fusion	790.329	94.8321	8.33048	3.18613e-07
IMZ28_RS03980		aminotransferase class I/II-fold pyridoxal phosphate-dependent enzyme && PF00155:Aminotransferase class I and II	405.878	52.8274	7.67098	6.34487e-09
IMZ28_RS00565		OprD family outer membrane porin && PF03573:outer membrane porin, OprD family	12412.2	1628.59	7.62151	2.18997e-10
IMZ28_RS00210		polysaccharide biosynthesis/export family protein && PF02563:Polysaccharide biosynthesis/export protein	713.412	95.5343	7.4634	1.86229e-30
IMZ28_RS10100	tsaD	tRNA (adenosine(37)-N6)-threonylcarbamoyltransferase complex transferase subunit TsaD && PF00814:Glycoprotease family	483.568	65.536	7.37545	1.11919e-16
IMZ28_RS10790		DUF58 domain-containing protein && PF01882:Protein of unknown function DUF58	381.866	52.1898	7.3095	7.25906e-23
IMZ28_RS10785		MoxR family ATPase && PF07726:ATPase family associated with various cellular activities (AAA)	733.566	101.082	7.25204	1.71561e-15
IMZ28_RS06775	psrC	polysulfide reductase NrfD && PF03916:Polysulphide reductase, NrfD	4571.68	642.372	7.11617	9.00095e-11
IMZ28_RS06635		nickel-dependent hydrogenase large subunit && PF00374:Nickel-dependent hydrogenase	524.759	77.3292	6.77812	6.35071e-16
IMZ28_RS04010	bluB	5%2C6-dimethylbenzimidazole synthase && PF00881:Nitroreductase family	340.567	50.4899	6.73464	5.04409e-13
IMZ28_RS00215		hypothetical protein && PF02706:Chain length determinant protein	1673.08	249.377	6.7087	1.73045e-14
IMZ28_RS06780	psrB	4Fe-4S dicluster domain-containing protein && PF13247:4Fe-4S dicluster domain	1986.36	299.058	6.64038	3.43855e-08
IMZ28_RS10095		alpha/beta hydrolase && PF06821:Serine hydrolase	380.428	57.2741	6.63464	5.95401e-09
IMZ28_RS04005		TIGR00303 family protein && -	648.32	99.7492	6.4928	2.76882e-13
IMZ28_RS06535		hypothetical protein && -	317.515	49.5251	6.41867	0.000413199
IMZ28_RS08360	metE	5-methyltetrahydropteroyltriglutamate--homocysteine S-methyltransferase && PF01717:Cobalamin-independent synthase, Catalytic domain|PF08267:Cobalamin-independent synthase, N-terminal domain	4167.34	651.161	6.39917	2.38572e-11
IMZ28_RS01190		NADH-quinone oxidoreductase subunit NuoN && PF00361:Proton-conducting membrane transporter	7250.34	1136.71	6.37796	2.17037e-16
IMZ28_RS03795	gmd	GDP-mannose 4%2C6-dehydratase && PF16363:GDP-mannose 4,6 dehydratase	901.622	143.935	6.25947	9.78386e-27
IMZ28_RS06540		zinc ABC transporter substrate-binding protein && PF01297:Zinc-uptake complex component A periplasmic	139.38	22.9316	6.09283	0.00104409
IMZ28_RS07110		hypothetical protein && -	1428	234.621	6.08637	3.06341e-12
IMZ28_RS01100		PTS transporter subunit EIIC && PF00367:phosphotransferase system, EIIB|PF02378:Phosphotransferase system, EIIC	790.275	130.209	6.06464	2.11878e-17
IMZ28_RS04515		sodium ion-translocating decarboxylase subunit beta && PF03977:Na+-transporting oxaloacetate decarboxylase beta subunit	7810.54	1318.33	5.92458	1.23448e-16
IMZ28_RS01745		carbon-nitrogen hydrolase && PF00795:Carbon-nitrogen hydrolase	645.629	111.879	5.76969	1.86091e-14
IMZ28_RS06720		4Fe-4S dicluster domain-containing protein && PF01058:NADH ubiquinone oxidoreductase, 20 Kd subunit|PF13187:4Fe-4S dicluster domain	1496.01	261.737	5.71677	7.213e-14
IMZ28_RS00130		ABC transporter ATP-binding protein && PF00005:ABC transporter	272.522	48.0098	5.66871	4.55945e-12
IMZ28_RS03995		cobyric acid synthase && PF01656:CobQ/CobB/MinD/ParA nucleotide binding domain|PF07685:CobB/CobQ-like glutamine amidotransferase domain	614.766	108.996	5.63465	1.71924e-08
IMZ28_RS10410		energy-coupling factor ABC transporter ATP-binding protein && PF00005:ABC transporter|PF07673:Protein of unknown function (DUF1602)	245.97	44.0257	5.59686	4.49402e-11
IMZ28_RS02365	cysC	adenylyl-sulfate kinase && PF01583:Adenylylsulphate kinase	265.019	48.1308	5.49945	7.28016e-17
IMZ28_RS03985		phosphotransferase && PF01636:Phosphotransferase enzyme family	352.164	65.2665	5.38763	5.39665e-11
IMZ28_RS01180	nuoL	NADH-quinone oxidoreductase subunit L && PF00662:NADH-Ubiquinone oxidoreductase (complex I), chain 5 N-terminus|PF00361:Proton-conducting membrane transporter	9237.48	1740.99	5.30578	3.58027e-12
IMZ28_RS03990	cbiB	cobalamin biosynthesis protein CobD && PF03186:CobD/Cbib protein	257.767	48.5989	5.29318	1.99282e-07
IMZ28_RS07310		OprD family outer membrane porin && PF03573:outer membrane porin, OprD family	338.424	64.3751	5.25554	3.59891e-06
IMZ28_RS09935		cytochrome-c oxidase%2C cbb3-type subunit II && PF02433:Cytochrome C oxidase, mono-heme subunit/FixO	7161.75	1377.68	5.1985	1.47933e-10
IMZ28_RS09930		cytochrome c oxidase%2C cbb3-type%2C CcoQ subunit && PF05545:Cbb3-type cytochrome oxidase component FixQ	1055.43	203.909	5.17636	1.35552e-12
IMZ28_RS00570		fumarylacetoacetate hydrolase family protein && PF01557:Fumarylacetoacetate (FAA) hydrolase family	2279.44	444.824	5.12538	5.95565e-16
IMZ28_RS08320		thiazole synthase && PF05690:Thiazole biosynthesis protein ThiG	2448.68	481.329	5.08644	3.59455e-10
IMZ28_RS00385		replication-associated recombination protein A && PF12002:MgsA AAA+ ATPase C terminal|PF05496:Holliday junction DNA helicase ruvB N-terminus|PF16193:AAA C-terminal domain	807.122	159.996	5.04155	1.71571e-13
IMZ28_RS02385	cysD	sulfate adenylyltransferase subunit CysD && PF01507:Phosphoadenosine phosphosulfate reductase family	1032.3	205.174	5.02817	4.37088e-21
IMZ28_RS07130		hypothetical protein && -	315.108	62.7215	5.02567	0.00042282
IMZ28_RS01185		NADH-quinone oxidoreductase subunit M && PF00361:Proton-conducting membrane transporter	6072.88	1230.69	4.93456	8.10546e-18
IMZ28_RS06220		DUF1104 domain-containing protein && PF06518:Protein of unknown function (DUF1104)|PF13499:EF-hand domain pair	1646.9	334.327	4.92564	7.42722e-06
IMZ28_RS10660		type II/IV secretion system protein && PF00437:Type II/IV secretion system protein	936.092	190.53	4.91005	6.34804e-17
IMZ28_RS07315		molybdopterin molybdotransferase MoeA && PF03453:MoeA N-terminal region (domain I and II)|PF03454:MoeA C-terminal region (domain IV)|PF00994:Probable molybdopterin binding domain	389.719	79.7929	4.87928	1.78607e-07
IMZ28_RS01165	nuoI	NADH-quinone oxidoreductase subunit NuoI && PF12838:4Fe-4S dicluster domain	4291.78	883.779	4.85588	2.95089e-08
IMZ28_RS09780		cytochrome c1 && PF00034:Cytochrome c	6269.29	1297.02	4.83367	2.44047e-10
IMZ28_RS08310	thiD	bifunctional hydroxymethylpyrimidine kinase/phosphomethylpyrimidine kinase && PF08543:Phosphomethylpyrimidine kinase	917.349	194.139	4.72411	1.85196e-12
IMZ28_RS04000		bifunctional adenosylcobinamide kinase/adenosylcobinamide-phosphate guanylyltransferase && PF02283:Cobinamide kinase / cobinamide phosphate guanyltransferase	209.294	44.239	4.71929	2.85978e-07
IMZ28_RS09920		DUF4006 family protein && PF13179:Family of unknown function (DUF4006)	2498.74	529.671	4.7175	3.75772e-14
IMZ28_RS10780		BatD family protein && PF13584:Oxygen tolerance	422.613	91.2327	4.62951	3.27285e-08
IMZ28_RS04015		iron ABC transporter permease && PF01032:FecCD transport family	347.818	75.0563	4.62671	9.00967e-11
IMZ28_RS07335	fdh3B	4Fe-4S dicluster domain-containing protein && PF13247:4Fe-4S dicluster domain	785.962	169.979	4.6211	9.99753e-08
IMZ28_RS09405	napG	ferredoxin-type protein NapG && PF12838:4Fe-4S dicluster domain	14784.1	3270.57	4.52022	0.00047028
IMZ28_RS06735		4Fe-4S dicluster domain-containing protein && PF13247:4Fe-4S dicluster domain	881.317	195.06	4.51937	1.14112e-09
IMZ28_RS06700	cybH	Ni/Fe-hydrogenase%2C b-type cytochrome subunit && PF00033:Cytochrome b/b6/petB	3364.93	761.206	4.42057	3.01572e-10
IMZ28_RS01810		CoA activase && PF01869:BadF/BadG/BcrA/BcrD ATPase family|PF09989:CoA enzyme activase uncharacterised domain (DUF2229)	893.406	202.504	4.40878	2.90578e-13
IMZ28_RS06515		TolC family protein && PF02321:Outer membrane efflux protein	547.018	124.104	4.40448	0.000989459
IMZ28_RS04510		biotin/lipoyl-binding protein && PF00364:Biotin-requiring enzyme|PF02436:Conserved carboxylase domain|PF00682:HMGL-like	10554.2	2397.67	4.40187	1.36026e-10
IMZ28_RS01170		NADH-quinone oxidoreductase subunit J && PF00499:NADH-ubiquinone/plastoquinone oxidoreductase chain 6	2622.42	599.339	4.37517	2.85143e-08
IMZ28_RS09395		cytochrome C && -	5010.38	1148.73	4.36132	0.000675995
IMZ28_RS07345		twin-arginine translocation signal domain-containing protein && -	665.13	152.515	4.35852	7.2949e-05
IMZ28_RS08555		hypothetical protein && -	9028.67	2122.69	4.25328	0.00224346
IMZ28_RS02575		nitrate- and nitrite sensing domain-containing protein && PF08376:Nitrate and nitrite sensing|PF00072:Response regulator receiver domain|PF02518:Histidine kinase-, DNA gyrase B-, and HSP90-like ATPase|PF00512:His Kinase A (phospho-acceptor) domain	6111.29	1449.79	4.21532	1.51431e-09
IMZ28_RS06705		nickel-dependent hydrogenase large subunit && PF00374:Nickel-dependent hydrogenase	11359.4	2699.6	4.20762	4.09545e-17
IMZ28_RS03765	galE	UDP-glucose 4-epimerase GalE && PF16363:GDP-mannose 4,6 dehydratase	1641.31	395.035	4.15367	8.58966e-05
IMZ28_RS04820		metal ABC transporter permease && PF00950:ABC 3 transport family	518.113	124.798	4.14784	5.69494e-11
IMZ28_RS07140		hypothetical protein && -	675.208	162.875	4.14463	0.000130971
IMZ28_RS06730		nickel-dependent hydrogenase large subunit && PF00346:Respiratory-chain NADH dehydrogenase, 49 Kd subunit|PF00374:Nickel-dependent hydrogenase	2017.8	490.657	4.11285	5.59138e-06
IMZ28_RS02125		BatD family protein && PF13584:Oxygen tolerance	1425.93	348.806	4.08857	4.31084e-18
IMZ28_RS00835	secY	preprotein translocase subunit SecY && PF00344:SecY translocase	13953.8	3432.54	4.06504	4.50317e-08
IMZ28_RS08315	thiE	thiamine phosphate synthase && PF02581:Thiamine monophosphate synthase/TENI	1081.39	266.083	4.06353	9.8423e-10
IMZ28_RS05595		hypothetical protein && -	544.556	134.342	4.05029	1.19074e-09
IMZ28_RS06785	psrA	molybdopterin-dependent oxidoreductase && PF01568:Molydopterin dinucleotide binding domain|PF00384:Molybdopterin oxidoreductase|PF04879:Molybdopterin oxidoreductase Fe4S4 domain	8312.99	2061.08	4.03318	0.000180562
IMZ28_RS02375	cysN	sulfate adenylyltransferase subunit CysN && PF00009:Elongation factor Tu GTP binding domain	1783.04	442.837	4.02514	5.0364e-10
IMZ28_RS03925		bi-domain-containing oxidoreductase && PF00107:Zinc-binding dehydrogenase|PF01408:Oxidoreductase family, NAD-binding Rossmann fold	1659.57	415.571	3.99279	1.08341e-13
IMZ28_RS07340		formate dehydrogenase subunit alpha && PF01568:Molydopterin dinucleotide binding domain|PF00384:Molybdopterin oxidoreductase|PF04879:Molybdopterin oxidoreductase Fe4S4 domain	4214.34	1059.44	3.97736	2.3412e-07
IMZ28_RS09410	napA	nitrate reductase catalytic subunit NapA && PF01568:Molydopterin dinucleotide binding domain|PF00384:Molybdopterin oxidoreductase|PF04879:Molybdopterin oxidoreductase Fe4S4 domain	58225.5	14661.8	3.97122	0.000324926
IMZ28_RS02590	uvrC	excinuclease ABC subunit UvrC && PF01541:GIY-YIG catalytic domain|PF08459:UvrC Helix-hairpin-helix N-terminal	459.155	116.126	3.95011	2.44754e-13
IMZ28_RS10070		4Fe-4S dicluster domain-containing protein && PF13183:4Fe-4S dicluster domain|PF13085:2Fe-2S iron-sulfur cluster binding domain	860.411	217.948	3.9464	4.39176e-20
IMZ28_RS02370	cysC	adenylyl-sulfate kinase && PF01583:Adenylylsulphate kinase|PF09834:Predicted membrane protein (DUF2061)	251.314	63.9483	3.93806	2.57921e-10
IMZ28_RS08650		HAMP domain-containing histidine kinase && PF02518:Histidine kinase-, DNA gyrase B-, and HSP90-like ATPase|PF00672:HAMP domain	913.506	234.457	3.89641	4.39779e-06
IMZ28_RS06745		glutamate synthase subunit beta && PF07992:Pyridine nucleotide-disulphide oxidoreductase|PF14691:Dihydroprymidine dehydrogenase domain II, 4Fe-4S cluster	2406.7	622.701	3.86538	9.92507e-07
IMZ28_RS00120		efflux RND transporter periplasmic adaptor subunit && PF16576:Barrel-sandwich domain of CusB or HlyD membrane-fusion	724.724	187.964	3.85308	1.84437e-06
IMZ28_RS02390		NAD-dependent epimerase && PF01370:NAD dependent epimerase/dehydratase family	741.191	193.429	3.83155	7.77128e-15
IMZ28_RS10090	dxr	1-deoxy-D-xylulose-5-phosphate reductoisomerase && PF13288:DXP reductoisomerase C-terminal domain|PF02670:1-deoxy-D-xylulose 5-phosphate reductoisomerase|PF08436:1-deoxy-D-xylulose 5-phosphate reductoisomerase C-terminal	761.723	199.522	3.81596	3.67957e-07
IMZ28_RS06215		DUF4405 domain-containing protein && PF14358:Domain of unknown function (DUF4405)	852.597	223.506	3.81413	0.000122371
IMZ28_RS08395		phosphatidylglycerophosphatase A && PF04608:Phosphatidylglycerophosphatase A	312.438	81.9551	3.80709	2.77142e-09
IMZ28_RS07810	ftsZ	cell division protein FtsZ && PF12327:FtsZ family, C-terminal domain|PF00091:Tubulin/FtsZ family, GTPase domain	8243.25	2174.47	3.79073	2.61295e-07
IMZ28_RS00140		c-type cytochrome && -	295.817	78.2767	3.77874	0.00637084
IMZ28_RS09925		c-type cytochrome && PF14715:N-terminal domain of cytochrome oxidase-cbb3, FixP|PF13442:Cytochrome C oxidase, cbb3-type, subunit III	5909.41	1566.1	3.77352	3.35292e-08
IMZ28_RS01580		EI24 domain-containing protein && PF07264:Etoposide-induced protein 2.4 (EI24)	694.155	184.368	3.76318	2.8841e-10
IMZ28_RS03785		mannose-1-phosphate guanylyltransferase/mannose-6-phosphate isomerase && PF00483:Nucleotidyl transferase|PF01050:Mannose-6-phosphate isomerase	844.741	226.177	3.73314	1.19515e-14
IMZ28_RS06995		DUF2461 domain-containing protein && PF09365:Conserved hypothetical protein (DUF2461)	130.137	34.9277	3.72376	8.72114e-09
IMZ28_RS09785		cytochrome bc complex cytochrome b subunit && PF00032:Cytochrome b(C-terminal)/b6/petD|PF13631:Cytochrome b(N-terminal)/b6/petB	7984.12	2157.28	3.70092	3.39774e-08
IMZ28_RS02530	raiA	ribosome-associated translation inhibitor RaiA && PF02482:Sigma 54 modulation protein / S30EA ribosomal protein|PF16321:Sigma 54 modulation/S30EA ribosomal protein C terminus	11650.1	3184.78	3.65784	5.54404e-09
IMZ28_RS07135		hypothetical protein && -	1083.91	296.913	3.65051	0.000184318
IMZ28_RS06725		NADH-quinone oxidoreductase subunit C && PF00329:Respiratory-chain NADH dehydrogenase, 30 Kd subunit	765.195	211.323	3.62203	3.68873e-07
IMZ28_RS01585		gamma carbonic anhydrase family protein && PF00132:Bacterial transferase hexapeptide (six repeats)	497.038	137.147	3.62022	7.17003e-14
IMZ28_RS10715		TIGR04219 family outer membrane beta-barrel protein && -	759.486	210.247	3.60974	2.85658e-12
IMZ28_RS00840	map	type I methionyl aminopeptidase && PF00557:Metallopeptidase family M24	5222.02	1448.63	3.60446	3.13064e-11
IMZ28_RS03585		P-II family nitrogen regulator && PF00543:Nitrogen regulatory protein P-II	185.481	51.4789	3.60358	0.000519164
IMZ28_RS08250		ATP citrate synthase && PF00285:Citrate synthase|PF00549:CoA-ligase	11990.8	3328.24	3.60282	5.77356e-06
IMZ28_RS00235		response regulator && PF01627:Hpt domain|PF00512:His Kinase A (phospho-acceptor) domain|PF00072:Response regulator receiver domain|PF08447:PAS fold|PF02518:Histidine kinase-, DNA gyrase B-, and HSP90-like ATPase	2218.73	616.307	3.60011	3.09551e-07
IMZ28_RS01160	nuoH	NADH-quinone oxidoreductase subunit NuoH && PF00146:NADH dehydrogenase	5533.55	1543.94	3.58392	1.88494e-07
IMZ28_RS09895		RecB-like helicase && PF00580:UvrD/REP helicase N-terminal domain|PF13361:UvrD-like helicase C-terminal domain	725.92	204.375	3.55069	6.0394e-16
IMZ28_RS03790		four helix bundle protein && PF05635:23S rRNA-intervening sequence protein	229.787	65.2422	3.52163	1.47933e-10
IMZ28_RS08325	thiS	sulfur carrier protein ThiS && PF02597:ThiS family	382.489	108.936	3.51132	1.03173e-06
IMZ28_RS02490		glucose-6-phosphate isomerase && PF00342:Phosphoglucose isomerase	629.149	179.647	3.50396	2.02872e-16
IMZ28_RS06910		DUF59 domain-containing protein && PF01883:Domain of unknown function DUF59	2192.53	628.445	3.48838	0.00192151
IMZ28_RS09855		ABC transporter permease && PF00528:Binding-protein-dependent transport system inner membrane component	456.171	131.594	3.46611	3.29606e-07
IMZ28_RS09445	cobA	uroporphyrinogen-III C-methyltransferase && PF00590:Tetrapyrrole (Corrin/Porphyrin) Methylases	2471.07	718.213	3.44027	0.00181604
IMZ28_RS03950		polysaccharide biosynthesis tyrosine autokinase && PF13807:G-rich domain on putative tyrosine kinase|PF13614:AAA domain|PF02706:Chain length determinant protein	5161.44	1517.4	3.40135	2.82879e-06
IMZ28_RS05990		sodium:solute symporter && PF00474:Sodium:solute symporter family	541.256	159.016	3.4007	2.86362e-14
IMZ28_RS05760		DUF819 family protein && PF05684:Protein of unknown function (DUF819)	648.119	191.445	3.38429	7.11896e-06
IMZ28_RS09390		nitrate reductase cytochrome c-type subunit && PF03892:Nitrate reductase cytochrome c-type subunit (NapB)	18348.4	5439.6	3.37303	0.00139045
IMZ28_RS03750		radical SAM protein && PF04055:Radical SAM superfamily	688.082	204.155	3.369	4.12858e-07
IMZ28_RS01150		(2Fe-2S)-binding protein && PF10588:NADH-ubiquinone oxidoreductase-G iron-sulfur binding region|PF13510:2Fe-2S iron-sulfur cluster binding domain	4875.2	1448.6	3.36539	3.60893e-05
Novel00005		PF07963:Prokaryotic N-terminal methylation motif	972.278	289.151	3.36194	0.00176395
IMZ28_RS07100		hypothetical protein && -	534.586	160.101	3.33763	6.87804e-10
IMZ28_RS05750		CoB--CoM heterodisulfide reductase iron-sulfur subunit B family protein && PF02754:Cysteine-rich domain	4798.4	1438.25	3.33607	3.43099e-05
IMZ28_RS03780		nucleotide sugar dehydrogenase && PF00984:UDP-glucose/GDP-mannose dehydrogenase family, central domain|PF03720:UDP-glucose/GDP-mannose dehydrogenase family, UDP binding domain|PF03721:UDP-glucose/GDP-mannose dehydrogenase family, NAD binding domain	1172.24	352.152	3.32787	2.25137e-08
IMZ28_RS09050	truB	tRNA pseudouridine(55) synthase TruB && PF01509:TruB family pseudouridylate synthase (N terminal domain)	431.343	129.814	3.31921	2.78437e-10
IMZ28_RS08295	pnuC	nicotinamide mononucleotide transporter && PF04973:Nicotinamide mononucleotide transporter	649.737	196.134	3.3117	8.88399e-05
IMZ28_RS06315	mrdA	penicillin-binding protein 2 && PF03717:Penicillin-binding Protein dimerisation domain|PF00905:Penicillin binding protein transpeptidase domain	687.502	207.805	3.30721	5.29582e-07
IMZ28_RS02865		LptF/LptG family permease && PF03739:Predicted permease YjgP/YjgQ family	232.503	70.346	3.30319	0.00111393
IMZ28_RS09940	ccoN	cytochrome-c oxidase%2C cbb3-type subunit I && PF00115:Cytochrome C and Quinol oxidase polypeptide I	12526	3798.16	3.29795	9.11412e-08
IMZ28_RS03735		YqhA family protein && PF03350:Uncharacterized protein family, UPF0114	1240.79	377.537	3.28598	1.78571e-06
IMZ28_RS01790		ATP-binding cassette domain-containing protein && PF00005:ABC transporter|PF07673:Protein of unknown function (DUF1602)	163.705	50.3724	3.25953	3.69044e-07
IMZ28_RS04520	pckA	phosphoenolpyruvate carboxykinase (ATP) && PF01293:Phosphoenolpyruvate carboxykinase	11664.6	3586.23	3.25263	0.000116654
IMZ28_RS07725		proline--tRNA ligase && PF03129:Anticodon binding domain|PF00587:tRNA synthetase class II core domain (G, H, P, S and T)|PF04073:Aminoacyl-tRNA editing domain	2961.19	911.65	3.24824	2.49228e-11
IMZ28_RS02880	coaBC	bifunctional phosphopantothenoylcysteine decarboxylase/phosphopantothenate--cysteine ligase CoaBC && PF04127:DNA / pantothenate metabolism flavoprotein|PF02441:Flavoprotein	1496.61	461.95	3.2389	1.56135e-07
IMZ28_RS02115		VWA domain-containing protein && PF13519:von Willebrand factor type A domain	1097.21	340.569	3.2212	2.08245e-06
IMZ28_RS09255		hypothetical protein && -	701.394	217.953	3.21608	1.83094e-06
IMZ28_RS06970		patatin-like phospholipase family protein && PF01734:Patatin-like phospholipase	580.122	180.483	3.21257	3.77652e-10
IMZ28_RS04030		TonB-dependent receptor && PF07715:TonB-dependent Receptor Plug Domain|PF00593:TonB dependent receptor	4313.49	1344.65	3.20742	4.74511e-10
IMZ28_RS08400		hypothetical protein && -	180.699	56.2705	3.20691	1.04272e-08
IMZ28_RS08290		phosphotransferase family protein && PF01633:Choline/ethanolamine kinase	163.743	51.1757	3.20487	6.94117e-06
IMZ28_RS07105		ThiF family adenylyltransferase && PF00899:ThiF family	1377.67	429.987	3.20321	3.89522e-09
IMZ28_RS08330		FAD-dependent oxidoreductase && PF01266:FAD dependent oxidoreductase	2048.86	642.347	3.18966	1.16636e-07
IMZ28_RS05455		lytic transglycosylase domain-containing protein && PF01464:Transglycosylase SLT domain	959.557	301.608	3.17968	1.67937e-12
IMZ28_RS02990	fbaA	class II fructose-bisphosphate aldolase && PF01116:Fructose-bisphosphate aldolase class-II	4567.95	1454.58	3.14028	2.76535e-11
IMZ28_RS02120		tetratricopeptide repeat protein && PF13432:Tetratricopeptide repeat	356.494	113.837	3.13408	6.15313e-10
IMZ28_RS00940		inorganic phosphate transporter && PF01384:Phosphate transporter family	1054.65	336.641	3.13373	5.6767e-08
IMZ28_RS01175	nuoK	NADH-quinone oxidoreductase subunit NuoK && PF00420:NADH-ubiquinone/plastoquinone oxidoreductase chain 4L	1057.51	340.075	3.10961	0.000116811
IMZ28_RS03230		OmpA family protein && PF00691:OmpA family	686.91	222.866	3.08075	6.51317e-10
IMZ28_RS03530	mshL	pilus (MSHA type) biogenesis protein MshL && PF00263:Bacterial type II and III secretion system protein|PF07655:Secretin N-terminal domain	3172.14	1036.95	3.05943	5.45941e-09
IMZ28_RS08565		anthranilate synthase component I family protein && PF04715:Anthranilate synthase component I, N terminal region|PF00425:chorismate binding enzyme	970.789	319.541	3.03753	9.38185e-10
IMZ28_RS04965		site-2 protease family protein && PF02163:Peptidase family M50	560.261	184.268	3.03722	7.90646e-09
IMZ28_RS06105	mreC	rod shape-determining protein MreC && PF04085:rod shape-determining protein MreC	409.772	136.392	3.00444	5.94732e-06
IMZ28_RS02815		FAD:protein FMN transferase && PF02424:ApbE family	334.538	111.579	2.99535	3.78396e-07
IMZ28_RS09025	cysK	cysteine synthase A && PF00291:Pyridoxal-phosphate dependent enzyme	799.952	267.087	2.99362	0.000106872
IMZ28_RS01075		hypothetical protein && PF03583:Secretory lipase	2055.39	689.385	2.98105	1.40285e-05
IMZ28_RS06740	hypA	hydrogenase maturation nickel metallochaperone HypA && PF01155:Hydrogenase/urease nickel incorporation, metallochaperone, hypA	413.448	139.249	2.97169	8.01444e-05
IMZ28_RS07320		winged helix-turn-helix domain-containing protein && PF00126:Bacterial regulatory helix-turn-helix protein, lysR family	217.593	73.2242	2.96628	0.00109173
IMZ28_RS01330	murD	UDP-N-acetylmuramoyl-L-alanine--D-glutamate ligase && PF08245:Mur ligase middle domain	531.835	180.717	2.94465	1.80371e-10
IMZ28_RS01015	aroC	chorismate synthase && PF01264:Chorismate synthase	1120.08	381.24	2.93715	4.45593e-12
IMZ28_RS07475		glycoside hydrolase family 9 protein && PF02927:N-terminal ig-like domain of cellulase|PF00759:Glycosyl hydrolase family 9	2094.74	713.448	2.93567	7.4547e-05
IMZ28_RS09020		carbonic anhydrase && PF00484:Carbonic anhydrase	518.223	176.673	2.93203	0.000896116
sRNA00086		-	624.203	216.794	2.87772	0.0108212
IMZ28_RS09270		UDP-N-acetylglucosamine--N-acetylmuramyl-(pentapeptide) pyrophosphoryl-undecaprenol N-acetylglucosamine transferase && PF03033:Glycosyltransferase family 28 N-terminal domain|PF04101:Glycosyltransferase family 28 C-terminal domain	115.418	40.4757	2.8616	2.96317e-06
IMZ28_RS01610		type II secretion system protein && PF07963:Prokaryotic N-terminal methylation motif	60182.9	21097.9	2.85253	0.0036077
IMZ28_RS01420		TonB-dependent receptor	4840.45	1699.44	2.84859	0.036057
IMZ28_RS05830		ATP-dependent metallopeptidase FtsH/Yme1/Tma family protein && PF00004:ATPase family associated with various cellular activities (AAA)|PF01434:Peptidase family M41	1118.92	393.036	2.84605	1.16264e-14
IMZ28_RS10065		FAD-dependent oxidoreductase && PF02910:Fumarate reductase flavoprotein C-term|PF00890:FAD binding domain	2102.17	739.588	2.84144	1.1374e-06
IMZ28_RS10775		VWA domain-containing protein && PF13519:von Willebrand factor type A domain	860.404	302.751	2.84098	3.64417e-07
IMZ28_RS09760	cydB	cytochrome d ubiquinol oxidase subunit II && PF02322:Cytochrome bd terminal oxidase subunit II	653.995	230.461	2.83874	0.00472523
IMZ28_RS06715		hypothetical protein && -	590.926	208.591	2.83412	0.00723351
IMZ28_RS10665	gspD	type II secretion system secretin GspD && PF00263:Bacterial type II and III secretion system protein|PF03958:Bacterial type II/III secretion system short domain	1871.02	661.123	2.8298	1.37041e-13
IMZ28_RS00825	rpsE	30S ribosomal protein S5 && PF03719:Ribosomal protein S5, C-terminal domain|PF00333:Ribosomal protein S5, N-terminal domain	11271.4	3985.08	2.82832	0.00150355
IMZ28_RS00400		RNase J family beta-CASP ribonuclease && PF00753:Metallo-beta-lactamase superfamily|PF07521:RNA-metabolising metallo-beta-lactamase	3948.95	1405.65	2.80899	4.71687e-07
IMZ28_RS10115	queF	NADPH-dependent 7-cyano-7-deazaguanine reductase QueF && PF14489:QueF-like protein	113.767	40.7356	2.79447	0.00667869
IMZ28_RS06100		rod shape-determining protein && PF06723:MreB/Mbl protein	2884.33	1032.26	2.79365	3.82907e-06
IMZ28_RS08780		efflux RND transporter permease subunit && PF00873:AcrB/AcrD/AcrF family	4681.75	1682.86	2.78187	1.1562e-08
IMZ28_RS09850		ABC transporter ATP-binding protein && PF07673:Protein of unknown function (DUF1602)|PF00005:ABC transporter	631.884	227.278	2.77872	1.09413e-05
IMZ28_RS06580		DUF695 domain-containing protein && PF05117:Family of unknown function (DUF695)|PF06877:Regulator of ribonuclease activity B	442.213	159.421	2.77429	0.0197555
IMZ28_RS06630		hydrogenase small subunit && PF07992:Pyridine nucleotide-disulphide oxidoreductase|PF04324:BFD-like [2Fe-2S] binding domain|PF01058:NADH ubiquinone oxidoreductase, 20 Kd subunit|PF14720:NiFe/NiFeSe hydrogenase small subunit C-terminal	761.864	277.516	2.74348	8.94494e-09
IMZ28_RS04020		ATP-binding cassette domain-containing protein && PF00005:ABC transporter	181.191	65.9909	2.73985	0.000356203
IMZ28_RS07720		FxsA family protein && PF04186:FxsA cytoplasmic membrane protein	496.251	181.47	2.73304	8.50092e-11
IMZ28_RS00115		TolC family protein && PF02321:Outer membrane efflux protein	814.409	297.853	2.73274	5.72089e-05
IMZ28_RS03800		four helix bundle protein && PF05635:23S rRNA-intervening sequence protein	114.087	41.7626	2.73255	0.000112645
IMZ28_RS01145		FAD-dependent oxidoreductase && PF14691:Dihydroprymidine dehydrogenase domain II, 4Fe-4S cluster|PF07992:Pyridine nucleotide-disulphide oxidoreductase|PF10589:NADH-ubiquinone oxidoreductase-F iron-sulfur binding region	6827.1	2500.03	2.73069	0.000362796
IMZ28_RS07990		allophanate hydrolase subunit 1 && PF02682:Allophanate hydrolase subunit 1	258.557	94.8654	2.72435	0.000101218
IMZ28_RS03955		capsular biosynthesis protein && -	782.955	287.641	2.723	8.55992e-07
IMZ28_RS00845	infA	translation initiation factor IF-1 && PF01176:Translation initiation factor 1A / IF-1	1120.83	411.455	2.72287	1.14754e-08
IMZ28_RS09825		pyruvate ferredoxin oxidoreductase && PF02775:Thiamine pyrophosphate enzyme, C-terminal TPP binding domain	14712.4	5411.29	2.71881	0.00143212
IMZ28_RS10725		MFS transporter && PF12832:MFS_1 like family	226.725	83.5919	2.71439	0.00200428
IMZ28_RS01625	rffA	dTDP-4-amino-4%2C6-dideoxygalactose transaminase && PF01041:DegT/DnrJ/EryC1/StrS aminotransferase family	183.562	68.1859	2.69709	0.000327345
IMZ28_RS10510	ccoG	cytochrome c oxidase accessory protein CcoG && PF11614:IG-like fold at C-terminal of FixG, putative oxidoreductase|PF13746:4Fe-4S dicluster domain|PF12801:4Fe-4S binding domain	4431.35	1647.99	2.68896	0.0197555
IMZ28_RS01000	recQ	DNA helicase RecQ && PF00570:HRDC domain|PF00271:Helicase conserved C-terminal domain|PF16124:RecQ zinc-binding|PF00270:DEAD/DEAH box helicase|PF09382:RQC domain	2815.83	1053.27	2.67357	8.11668e-06
IMZ28_RS10460		UDP-N-acetylmuramate dehydrogenase && PF02873:UDP-N-acetylenolpyruvoylglucosamine reductase, C-terminal domain	407.858	152.795	2.67013	2.44109e-05
IMZ28_RS04500		DEAD/DEAH box helicase && PF00270:DEAD/DEAH box helicase|PF00271:Helicase conserved C-terminal domain	2944.35	1103.78	2.66753	5.94732e-06
IMZ28_RS07390		OprD family outer membrane porin && PF03573:outer membrane porin, OprD family	818.542	307.285	2.66217	0.00240836
IMZ28_RS03740	hemE	uroporphyrinogen decarboxylase && PF01208:Uroporphyrinogen decarboxylase (URO-D)	3119.46	1173.09	2.65874	3.22242e-05
IMZ28_RS00015		CTP synthase && PF06418:CTP synthase N-terminus|PF00117:Glutamine amidotransferase class-I	3116.35	1174.71	2.65309	1.03184e-07
IMZ28_RS03655		ABC transporter permease && PF12704:MacB-like periplasmic core domain|PF02687:FtsX-like permease family	839.987	317.293	2.64671	0.000678501
IMZ28_RS03235		tetratricopeptide repeat protein && -	1013.54	383.076	2.64584	2.86247e-12
IMZ28_RS01005		ribonuclease HII && PF01351:Ribonuclease HII	463.936	176.935	2.62416	6.4736e-06
IMZ28_RS08970	dacB	D-alanyl-D-alanine carboxypeptidase/D-alanyl-D-alanine-endopeptidase && PF05036:Sporulation related domain|PF02113:D-Ala-D-Ala carboxypeptidase 3 (S13) family	400.314	152.848	2.6228	2.04998e-06
IMZ28_RS09790		Rieske 2Fe-2S domain-containing protein && PF00355:Rieske [2Fe-2S] domain	4221.94	1617.17	2.61035	2.66978e-07
IMZ28_RS09400	napH	quinol dehydrogenase ferredoxin subunit NapH && PF13237:4Fe-4S dicluster domain|PF12801:4Fe-4S binding domain	7482.57	2883.89	2.59449	0.0100863
IMZ28_RS09230		cation:proton antiporter && PF00999:Sodium/hydrogen exchanger family	318.9	123.521	2.58241	2.04152e-06
IMZ28_RS05745	sdhB	succinate dehydrogenase iron-sulfur subunit && PF13183:4Fe-4S dicluster domain|PF13085:2Fe-2S iron-sulfur cluster binding domain	4518.52	1752.01	2.57893	0.00209509
IMZ28_RS03635		NarK/NasA family nitrate transporter && PF07690:Major Facilitator Superfamily	449.11	174.533	2.57423	0.00887729
IMZ28_RS06460		lytic murein transglycosylase && PF13406:Transglycosylase SLT domain	163.828	63.7144	2.57256	5.2765e-05
IMZ28_RS03730		aspartate-semialdehyde dehydrogenase && PF01118:Semialdehyde dehydrogenase, NAD binding domain|PF02774:Semialdehyde dehydrogenase, dimerisation domain	3473.69	1351.24	2.57037	9.06286e-06
IMZ28_RS08980	ovoA	5-histidylcysteine sulfoxide synthase && PF03781:Sulfatase-modifying factor enzyme 1|PF12867:DinB superfamily|PF12847:Methyltransferase domain	1592.31	620.622	2.56544	1.25417e-09
IMZ28_RS06710		hydrogenase small subunit && PF01058:NADH ubiquinone oxidoreductase, 20 Kd subunit|PF14720:NiFe/NiFeSe hydrogenase small subunit C-terminal	7740.53	3021.99	2.56119	3.38762e-06
IMZ28_RS08255		ATPase && PF08442:ATP-grasp domain|PF16114:ATP citrate lyase citrate-binding	5926.39	2316.72	2.55827	1.63067e-06
IMZ28_RS03550		type II secretion system F family protein && PF00482:Type II secretion system (T2SS), protein F	1172.5	460.004	2.55012	5.91024e-06
IMZ28_RS06110	carB	carbamoyl-phosphate synthase large subunit && PF02142:MGS-like domain|PF02787:Carbamoyl-phosphate synthetase large chain, oligomerisation domain|PF02786:Carbamoyl-phosphate synthase L chain, ATP binding domain	6623.47	2600.49	2.54685	2.66252e-10
IMZ28_RS10760	coaE	dephospho-CoA kinase && PF01121:Dephospho-CoA kinase	441.164	173.679	2.53697	7.11959e-06
IMZ28_RS01080		outer membrane protein transport protein && PF03349:Outer membrane protein transport protein (OMPP1/FadL/TodX)	1917.15	757.275	2.53149	0.00224381
IMZ28_RS03590		ammonium transporter && PF00909:Ammonium Transporter Family	609.52	241.188	2.52762	0.0114742
IMZ28_RS09235		DsbA family protein && PF13743:Thioredoxin	278.74	110.459	2.52452	1.53001e-05
IMZ28_RS00695		SAM-dependent DNA methyltransferase && PF12161:HsdM N-terminal domain|PF02384:N-6 DNA Methylase	639.305	253.409	2.52201	8.72114e-09
IMZ28_RS02660		polyribonucleotide nucleotidyltransferase && PF03725:3' exoribonuclease family, domain 2|PF00575:S1 RNA binding domain|PF03726:Polyribonucleotide nucleotidyltransferase, RNA binding domain|PF01138:3' exoribonuclease family, domain 1|PF00013:KH domain	3418.08	1356.09	2.52014	8.86847e-11
IMZ28_RS04570		DEAD/DEAH box helicase && PF00270:DEAD/DEAH box helicase|PF00271:Helicase conserved C-terminal domain	577.445	229.134	2.52	3.37212e-10
IMZ28_RS10420		energy-coupling factor ABC transporter permease && PF01891:Cobalt uptake substrate-specific transmembrane region	403.192	160.061	2.51941	0.00534651
IMZ28_RS05460		YggT family protein && PF02325:YGGT family	356.532	141.597	2.51674	4.82032e-07
IMZ28_RS09450		radical SAM protein && PF04055:Radical SAM superfamily|PF13353:4Fe-4S single cluster domain	1579.37	627.539	2.51655	0.00965121
IMZ28_RS04180	purH	bifunctional phosphoribosylaminoimidazolecarboxamide formyltransferase/IMP cyclohydrolase && PF01808:AICARFT/IMPCHase bienzyme|PF02142:MGS-like domain	4549.65	1812.79	2.50966	0.000161786
IMZ28_RS00790	rplN	50S ribosomal protein L14 && PF00238:Ribosomal protein L14p/L23e	6910.18	2753.92	2.50911	0.00495464
IMZ28_RS09045		UvrD-helicase domain-containing protein && PF00580:UvrD/REP helicase N-terminal domain|PF13361:UvrD-like helicase C-terminal domain	4362.2	1739.21	2.50779	5.1926e-08
IMZ28_RS10385		cation:proton antiporter && PF00999:Sodium/hydrogen exchanger family	467.197	186.274	2.50751	2.66149e-09
IMZ28_RS09225	glnA	type I glutamate--ammonia ligase && PF03951:Glutamine synthetase, beta-Grasp domain|PF00120:Glutamine synthetase, catalytic domain	13255.2	5320.99	2.49104	1.64431e-05
IMZ28_RS00110		efflux RND transporter permease subunit && PF00873:AcrB/AcrD/AcrF family	3711	1490.73	2.48894	4.65525e-05
IMZ28_RS02110		VWA domain-containing protein && PF13519:von Willebrand factor type A domain	1006.81	404.545	2.48873	0.000215258
IMZ28_RS07575		UDP-N-acetylmuramoyl-tripeptide--D-alanyl-D-alanine ligase && PF02875:Mur ligase family, glutamate ligase domain|PF08245:Mur ligase middle domain	1778.09	714.895	2.48681	1.07722e-06
IMZ28_RS09420		hypothetical protein && -	4002.01	1610.7	2.48442	0.012984
IMZ28_RS02870		prepilin peptidase && PF01478:Type IV leader peptidase family|PF06750:Bacterial Peptidase A24 N-terminal domain	268.111	108.752	2.46687	0.00259947
IMZ28_RS09030		aminotransferase class IV && PF01063:Amino-transferase class IV	106.347	43.0397	2.46311	8.98418e-05
IMZ28_RS00800	rplE	50S ribosomal protein L5 && PF00281:Ribosomal protein L5|PF00673:ribosomal L5P family C-terminus	10872.4	4417.47	2.46117	0.00402454
IMZ28_RS06860		bifunctional aconitate hydratase 2/2-methylisocitrate dehydratase && PF06434:Aconitate hydratase 2 N-terminus|PF00330:Aconitase family (aconitate hydratase)|PF11791:Aconitate B N-terminal domain	15215.1	6210.78	2.44975	1.62332e-06
IMZ28_RS01095		PTS glucose transporter subunit IIA && PF00358:phosphoenolpyruvate-dependent sugar phosphotransferase system, EIIA 1	485.075	198.169	2.44765	0.000452584
IMZ28_RS02485		phosphomannomutase/phosphoglucomutase && PF02879:Phosphoglucomutase/phosphomannomutase, alpha/beta/alpha domain II|PF02880:Phosphoglucomutase/phosphomannomutase, alpha/beta/alpha domain III|PF02878:Phosphoglucomutase/phosphomannomutase, alpha/beta/alpha domain I|PF00408:Phosphoglucomutase/phosphomannomutase, C-terminal domain	1534.27	627.093	2.44588	1.71078e-06
IMZ28_RS09250		septum formation inhibitor Maf && PF02545:Maf-like protein	373.066	153.146	2.43959	5.06239e-06
IMZ28_RS06590		hydrogenase && PF00551:Formyl transferase|PF00378:Enoyl-CoA hydratase/isomerase	726.708	300.749	2.41627	0.0357303
IMZ28_RS04175	purL	phosphoribosylformylglycinamidine synthase subunit PurL && PF02769:AIR synthase related protein, C-terminal domain|PF00586:AIR synthase related protein, N-terminal domain	7759.41	3211.63	2.41595	9.12531e-06
IMZ28_RS09995	tkt	transketolase && PF02780:Transketolase, C-terminal domain|PF00456:Transketolase, thiamine diphosphate binding domain|PF02779:Transketolase, pyrimidine binding domain	6857.93	2840.11	2.41452	7.24003e-07
IMZ28_RS08075	fumC	class II fumarate hydratase && PF10415:Fumarase C C-terminus|PF00206:Lyase	4990.38	2067.61	2.41354	3.69782e-05
IMZ28_RS03540		CDC27 family protein && PF12895:Anaphase-promoting complex, cyclosome, subunit 3	285.274	118.561	2.41002	0.000816207
IMZ28_RS10600		DUF3373 family protein && PF11853:Protein of unknown function (DUF3373)	64468.6	26771.7	2.40808	3.51203e-06
IMZ28_RS00390		rRNA pseudouridine synthase && PF00849:RNA pseudouridylate synthase|PF01479:S4 domain	1036.79	431.617	2.40068	1.95059e-06
IMZ28_RS04230		inositol monophosphatase && PF00459:Inositol monophosphatase family	1220.55	509.217	2.3965	9.41721e-08
IMZ28_RS00795		50S ribosomal protein L24 && PF00467:KOW motif	5933.18	2475.72	2.39643	0.00601854
IMZ28_RS06205		EAL domain-containing protein && PF00563:EAL domain|PF08447:PAS fold|PF00990:Diguanylate cyclase, GGDEF domain|PF08448:PAS fold	790.1	329.709	2.39538	7.42632e-05
IMZ28_RS10505		hypothetical protein && -	325.627	136.06	2.39417	0.00933148
IMZ28_RS01395		HAMP domain-containing histidine kinase && PF02518:Histidine kinase-, DNA gyrase B-, and HSP90-like ATPase	38.6373	16.2635	2.3897	0.00795133
IMZ28_RS05170	crcB	fluoride efflux transporter CrcB && PF02537:CrcB-like protein, Camphor Resistance (CrcB)	300.655	126.339	2.37646	4.90866e-06
IMZ28_RS02875	uppS	di-trans%2Cpoly-cis-decaprenylcistransferase && PF01255:Putative undecaprenyl diphosphate synthase	389.965	164.08	2.37515	1.61346e-07
IMZ28_RS01695		FAD-binding protein && PF02913:FAD linked oxidases, C-terminal domain|PF01565:FAD binding domain	1668.95	706.363	2.3625	1.60689e-05
IMZ28_RS00805		type Z 30S ribosomal protein S14 && PF00253:Ribosomal protein S14p/S29e	2308.39	989.625	2.33235	0.00253998
IMZ28_RS02580		Hpt domain-containing protein && -	3546	1529.8	2.3179	0.0201839
IMZ28_RS10300		polysaccharide biosynthesis protein && PF02719:Polysaccharide biosynthesis protein	242.354	104.584	2.31582	0.000455548
IMZ28_RS10500		FAD-dependent oxidoreductase && PF07992:Pyridine nucleotide-disulphide oxidoreductase	4118.39	1778.97	2.31502	0.0298258
IMZ28_RS10545	glmM	phosphoglucosamine mutase && PF02880:Phosphoglucomutase/phosphomannomutase, alpha/beta/alpha domain III|PF02878:Phosphoglucomutase/phosphomannomutase, alpha/beta/alpha domain I|PF02879:Phosphoglucomutase/phosphomannomutase, alpha/beta/alpha domain II	936.6	404.853	2.31214	4.21787e-05
IMZ28_RS10055		YjbQ family protein && PF01894:Uncharacterised protein family UPF0047	175.71	76.0584	2.30643	5.62079e-05
IMZ28_RS08065	sucD	succinate--CoA ligase subunit alpha && PF02629:CoA binding domain|PF00549:CoA-ligase	4280.89	1862.12	2.29905	0.000462552
IMZ28_RS01450		c-type cytochrome && PF00034:Cytochrome c	739.423	321.605	2.29797	0.0455501
IMZ28_RS03190		biopolymer transporter ExbD && PF02472:Biopolymer transport protein ExbD/TolR	138.204	60.2853	2.29573	0.0204342
IMZ28_RS10310		peptide-binding protein && PF02516:Oligosaccharyl transferase STT3 subunit	1622.63	709.695	2.28584	1.49408e-08
IMZ28_RS08040		2-oxoacid:acceptor oxidoreductase family protein && PF01558:Pyruvate ferredoxin/flavodoxin oxidoreductase	6953.71	3045.22	2.2835	1.70835e-05
IMZ28_RS09200		Nif3-like dinuclear metal center hexameric protein && PF01784:NIF3 (NGG1p interacting factor 3)	879.605	385.225	2.28334	0.000248905
IMZ28_RS10145	rpoC	DNA-directed RNA polymerase subunit beta' && PF04997:RNA polymerase Rpb1, domain 1|PF04983:RNA polymerase Rpb1, domain 3|PF00623:RNA polymerase Rpb1, domain 2|PF04998:RNA polymerase Rpb1, domain 5|PF05000:RNA polymerase Rpb1, domain 4	15778.2	6917.93	2.28071	4.85196e-07
IMZ28_RS10345		DegT/DnrJ/EryC1/StrS family aminotransferase && PF01041:DegT/DnrJ/EryC1/StrS aminotransferase family	412.602	181.029	2.27934	3.78169e-06
IMZ28_RS09975	ciaB	invasion protein CiaB && -	896.686	394.186	2.2748	0.00163959
IMZ28_RS02630		uroporphyrinogen-III synthase && PF02602:Uroporphyrinogen-III synthase HemD	503.969	222.601	2.26477	0.0236371
IMZ28_RS05180		hypothetical protein && -	1067.59	471.794	2.26316	3.02084e-06
IMZ28_RS03170		F0F1 ATP synthase subunit gamma && PF00231:ATP synthase	6361.69	2814.49	2.26033	9.02912e-05
IMZ28_RS03535		ATP-binding protein && PF13401:AAA domain	490.764	217.797	2.25586	0.00683054
IMZ28_RS10950		type II secretion system protein	682.545	302.975	2.25198	1.00434e-07
IMZ28_RS02545		prepilin-type N-terminal cleavage/methylation domain-containing protein && -	682.545	302.975	2.25198	1.00434e-07
IMZ28_RS00810	rpsH	30S ribosomal protein S8 && PF00410:Ribosomal protein S8	6581.86	2929.18	2.24689	0.00716273
IMZ28_RS00125		ABC transporter permease && PF02687:FtsX-like permease family|PF12704:MacB-like periplasmic core domain	471.848	209.889	2.24545	6.24911e-05
IMZ28_RS10160	rplJ	50S ribosomal protein L10 && PF00466:Ribosomal protein L10	12869.2	5733.34	2.24457	7.11896e-06
IMZ28_RS06125		class I SAM-dependent methyltransferase && PF13489:Methyltransferase domain	138.209	61.7742	2.24046	0.00795133
IMZ28_RS01090	nagA	N-acetylglucosamine-6-phosphate deacetylase && PF01979:Amidohydrolase family	495.341	221.644	2.23423	3.52973e-05
IMZ28_RS01155		NADH-quinone oxidoreductase subunit G && PF10588:NADH-ubiquinone oxidoreductase-G iron-sulfur binding region|PF13510:2Fe-2S iron-sulfur cluster binding domain	8602.05	3850.62	2.23392	0.00546275
IMZ28_RS03490		M3 family metallopeptidase && PF01432:Peptidase family M3	2128.36	952.786	2.2337	0.0217264
IMZ28_RS10355		Gfo/Idh/MocA family oxidoreductase && PF02894:Oxidoreductase family, C-terminal alpha/beta domain|PF01408:Oxidoreductase family, NAD-binding Rossmann fold	692.31	310.189	2.23143	0.000479858
IMZ28_RS01530	accA	acetyl-CoA carboxylase carboxyl transferase subunit alpha && PF03255:Acetyl co-enzyme A carboxylase carboxyltransferase alpha subunit	3032.74	1360.08	2.2296	1.21399e-07
IMZ28_RS04650		efflux RND transporter permease subunit && PF00873:AcrB/AcrD/AcrF family	2467.25	1107.39	2.22774	0.0284031
IMZ28_RS00830	rplO	50S ribosomal protein L15 && PF00828:Ribosomal protein L18e/L15	8399.85	3770.99	2.22745	0.0068235
IMZ28_RS07650		enoyl-ACP reductase && PF13561:Enoyl-(Acyl carrier protein) reductase	2632.7	1184.61	2.22226	6.51397e-05
Novel00019		-	1981.76	892.544	2.22039	1.21824e-06
IMZ28_RS09830		2-oxoacid:ferredoxin oxidoreductase subunit alpha && PF02780:Transketolase, C-terminal domain|PF01855:Pyruvate flavodoxin/ferredoxin oxidoreductase, thiamine diP-bdg	20328.9	9171.88	2.21642	0.0151489
IMZ28_RS10350		N-acetyltransferase && PF00132:Bacterial transferase hexapeptide (six repeats)	225.86	102.195	2.21444	0.000224183
IMZ28_RS07995		5-oxoprolinase subunit PxpA && PF03746:LamB/YcsF family	635.863	288.826	2.20161	0.00141406
IMZ28_RS09115		glycosyltransferase family 2 protein && PF13641:Glycosyltransferase like family 2	2135.19	971.508	2.19745	0.0447222
IMZ28_RS09595	hisIE	bifunctional phosphoribosyl-AMP cyclohydrolase/phosphoribosyl-ATP diphosphatase HisIE && PF01502:Phosphoribosyl-AMP cyclohydrolase|PF01503:Phosphoribosyl-ATP pyrophosphohydrolase	352.633	161.285	2.18933	0.00184081
IMZ28_RS09650		homoserine dehydrogenase && PF03447:Homoserine dehydrogenase, NAD binding domain|PF01842:ACT domain|PF00742:Homoserine dehydrogenase	2910.21	1330.23	2.18779	0.00301321
IMZ28_RS06120		HIT family protein && -	85.8392	39.2654	2.18324	0.00924012
IMZ28_RS01020	rnc	ribonuclease III && PF00035:Double-stranded RNA binding motif|PF14622:Ribonuclease-III-like	677.171	310.471	2.18008	0.00314837
IMZ28_RS03725	gyrA	DNA gyrase subunit A && PF03989:DNA gyrase C-terminal domain, beta-propeller|PF00521:DNA gyrase/topoisomerase IV, subunit A	6287.72	2889.41	2.17608	0.0337878
IMZ28_RS10305		aminotransferase class V-fold PLP-dependent enzyme && PF01041:DegT/DnrJ/EryC1/StrS aminotransferase family	600.089	275.908	2.17416	1.22169e-06
IMZ28_RS07330		cytochrome b/b6 domain-containing protein && PF00033:Cytochrome b/b6/petB	312.931	144.025	2.16962	5.77234e-06
IMZ28_RS10815		carbon-nitrogen hydrolase family protein && PF00795:Carbon-nitrogen hydrolase	789.763	364.078	2.16959	0.000116654
IMZ28_RS03910		N-acetyl sugar amidotransferase && -	620.172	287.526	2.15612	1.1374e-06
IMZ28_RS04825		ABC transporter ATP-binding protein && PF00005:ABC transporter|PF07673:Protein of unknown function (DUF1602)	362.486	168.448	2.14893	3.06656e-05
IMZ28_RS03620	psrA	nitrate reductase && PF01568:Molydopterin dinucleotide binding domain|PF00384:Molybdopterin oxidoreductase|PF04879:Molybdopterin oxidoreductase Fe4S4 domain	4494.85	2103.62	2.13648	0.0235954
IMZ28_RS10655		prepilin-type N-terminal cleavage/methylation domain-containing protein && PF13544:Type IV pilin N-term methylation site GFxxxE	94.6021	44.4786	2.13469	0.0317237
IMZ28_RS01300	tilS	tRNA lysidine(34) synthetase TilS && PF01171:PP-loop family	310.446	145.461	2.13185	4.73794e-06
IMZ28_RS05495		PDC sensor domain-containing protein && PF02743:Cache domain	1155.95	542.356	2.13085	0.00149899
IMZ28_RS08785		efflux RND transporter periplasmic adaptor subunit && PF16576:Barrel-sandwich domain of CusB or HlyD membrane-fusion	1338	628.768	2.12793	4.29898e-09
IMZ28_RS06965		pyridoxal phosphate-dependent aminotransferase && PF00155:Aminotransferase class I and II	3090.1	1453.42	2.12603	6.11719e-10
IMZ28_RS01140		NADH-ubiquinone oxidoreductase subunit E family protein && PF16514:putative NADH-ubiquinone oxidoreductase chain E	1486.59	699.929	2.12391	0.0247924
IMZ28_RS02985		hypothetical protein && -	4780.04	2252.11	2.1225	0.000253397
IMZ28_RS00275		response regulator transcription factor && PF00072:Response regulator receiver domain|PF00486:Transcriptional regulatory protein, C terminal	1236.28	583.347	2.11868	0.000380783
IMZ28_RS03175	atpD	F0F1 ATP synthase subunit beta && PF00006:ATP synthase alpha/beta family, nucleotide-binding domain|PF00306:ATP synthase alpha/beta chain, C terminal domain|PF02874:ATP synthase alpha/beta family, beta-barrel domain	14697.9	6942.3	2.11714	6.35059e-05
IMZ28_RS01780		TOBE domain-containing protein && -	76.4736	36.3325	2.11664	0.0298258
IMZ28_RS00820	rplR	50S ribosomal protein L18 && PF00861:Ribosomal L18p/L5e family	7215.28	3413.51	2.11368	0.0102833
IMZ28_RS08045		2-oxoglutarate ferredoxin oxidoreductase subunit beta && PF02775:Thiamine pyrophosphate enzyme, C-terminal TPP binding domain	12819.5	6087.61	2.10579	0.000339372
IMZ28_RS10540	lspA	lipoprotein signal peptidase && PF01252:Signal peptidase (SPase) II	231.123	110.147	2.09919	0.00135898
IMZ28_RS03090		HesA/MoeB/ThiF family protein && PF00899:ThiF family	771.629	369.659	2.08678	0.001164
IMZ28_RS06905		SufE family protein && PF02657:Fe-S metabolism associated domain	1066.38	511.071	2.08595	0.042388
IMZ28_RS04680	sppA	signal peptide peptidase SppA && PF01343:Peptidase family S49	570.088	274.28	2.07713	2.2424e-06
IMZ28_RS08960		hypothetical protein && -	667.6	321.49	2.07696	9.85137e-06
IMZ28_RS03180		F0F1 ATP synthase subunit epsilon && PF02823:ATP synthase, Delta/Epsilon chain, beta-sandwich domain	4499.72	2166.9	2.07659	0.000452631
IMZ28_RS09210	purE	5-(carboxyamino)imidazole ribonucleotide mutase && PF00731:AIR carboxylase	652.264	314.488	2.07495	2.08245e-06
IMZ28_RS07945	ftsY	signal recognition particle-docking protein FtsY && PF00448:SRP54-type protein, GTPase domain	403.895	194.795	2.07472	0.00034779
IMZ28_RS03615		MOSC domain-containing protein && -	154.837	74.4249	2.07454	0.00306783
IMZ28_RS00780	rpmC	50S ribosomal protein L29 && PF00831:Ribosomal L29 protein	3213.72	1550.31	2.07279	0.0120359
IMZ28_RS05590		NYN domain-containing protein && PF12872:OST-HTH/LOTUS domain|PF01936:NYN domain	921.122	444.944	2.06994	0.01751
IMZ28_RS08090		NADP-dependent isocitrate dehydrogenase && PF03971:Monomeric isocitrate dehydrogenase	15450.4	7473.8	2.06726	0.00607401
IMZ28_RS09530		TrkH family potassium uptake protein && PF02386:Cation transport protein	331.067	160.398	2.06719	0.00151963
IMZ28_RS09870		FAD-dependent oxidoreductase && PF07992:Pyridine nucleotide-disulphide oxidoreductase	12701.5	6146.43	2.0664	0.000173704
IMZ28_RS07985		biotin-dependent carboxyltransferase && PF02626:Allophanate hydrolase subunit 2	382.126	185.44	2.06173	0.00139045
IMZ28_RS03930		alginate lyase family protein && PF16889:Heparinase II/III N-terminus|PF07940:Heparinase II/III-like protein	266.098	129.398	2.06008	0.0183015
IMZ28_RS04950		adenine phosphoribosyltransferase && PF00156:Phosphoribosyl transferase domain	778.724	378.324	2.05794	2.08245e-06
IMZ28_RS05600		ATP-dependent helicase && PF13361:UvrD-like helicase C-terminal domain|PF00580:UvrD/REP helicase N-terminal domain	706.529	343.989	2.05453	0.000875618
IMZ28_RS04155	mnmE	tRNA uridine-5-carboxymethylaminomethyl(34) synthesis GTPase MnmE && PF12631:MnmE helical domain|PF01926:50S ribosome-binding GTPase|PF10396:GTP-binding protein TrmE N-terminus	770.197	375.084	2.05345	3.95894e-05
IMZ28_RS00220		alkaline phosphatase family protein && PF01663:Type I phosphodiesterase / nucleotide pyrophosphatase	2799.56	1364.33	2.05192	0.000206751
IMZ28_RS09245		pyridoxal phosphate-dependent aminotransferase family protein && PF00155:Aminotransferase class I and II	771.626	376.386	2.04976	2.0604e-05
IMZ28_RS04775		hypothetical protein && PF08443:RimK-like ATP-grasp domain	2064.11	1007.17	2.04935	0.0201203
IMZ28_RS04970	lepB	signal peptidase I && PF00717:Peptidase S24-like	1027.72	503.713	2.0397	0.000582581
IMZ28_RS03825	pseC	UDP-4-amino-4%2C6-dideoxy-N-acetyl-beta-L-altrosamine transaminase && PF01041:DegT/DnrJ/EryC1/StrS aminotransferase family	610.088	299.789	2.03655	0.00318467
IMZ28_RS08570		shikimate dehydrogenase && PF08501:Shikimate dehydrogenase substrate binding domain	463.072	227.708	2.0357	0.000284862
IMZ28_RS01390		DUF2202 domain-containing protein && PF09968:Uncharacterized protein domain (DUF2202)	226.624	111.396	2.03197	0.00466385
IMZ28_RS00155		response regulator transcription factor && PF00486:Transcriptional regulatory protein, C terminal|PF00072:Response regulator receiver domain	390.9	193.475	2.01797	0.00550816
IMZ28_RS01320		hypothetical protein && -	46446.8	23029.1	2.01685	0.00529454
IMZ28_RS06755		ribonucleoside triphosphate reductase && PF03477:ATP cone domain|PF13597:Anaerobic ribonucleoside-triphosphate reductase	411.81	204.439	2.01518	0.000116894
IMZ28_RS02395		nucleotide sugar dehydrogenase && PF00984:UDP-glucose/GDP-mannose dehydrogenase family, central domain|PF03720:UDP-glucose/GDP-mannose dehydrogenase family, UDP binding domain|PF03721:UDP-glucose/GDP-mannose dehydrogenase family, NAD binding domain	2451.06	1217.02	2.01353	9.22108e-06
IMZ28_RS04415	ccsA	cytochrome c biogenesis protein CcsA && PF05140:ResB-like family|PF01578:Cytochrome C assembly protein	7224.16	3591.25	2.0115	0.00320183
IMZ28_RS02090	mfd	transcription-repair coupling factor && PF00271:Helicase conserved C-terminal domain|PF03461:TRCF domain|PF02559:CarD-like/TRCF domain|PF00270:DEAD/DEAH box helicase	873.546	434.458	2.01114	0.000515333
IMZ28_RS08775		hypothetical protein && PF09656:Putative transmembrane protein (PGPGW)	406.047	202.442	2.00607	0.00777021
IMZ28_RS00765	rplV	50S ribosomal protein L22 && PF00237:Ribosomal protein L22p/L17e	4258.67	2124.69	2.00426	0.0264112
IMZ28_RS08390		sulfate adenylyltransferase && PF14306:PUA-like domain|PF01747:ATP-sulfurylase	699.121	349.403	2.00024	0.000279854
IMZ28_RS03810	wecB	UDP-N-acetylglucosamine 2-epimerase (non-hydrolyzing) && PF02350:UDP-N-acetylglucosamine 2-epimerase	248.373	124.372	1.99864	0.00348821
IMZ28_RS10425		transporter && -	989.316	496.189	1.99384	0.0444705
IMZ28_RS09605	purF	amidophosphoribosyltransferase && PF13537:Glutamine amidotransferase domain|PF00156:Phosphoribosyl transferase domain	4855.71	2439.34	1.99061	0.0064003
IMZ28_RS00755	rplB	50S ribosomal protein L2 && PF00181:Ribosomal Proteins L2, RNA binding domain|PF03947:Ribosomal Proteins L2, C-terminal domain	12692.3	6382.34	1.98862	0.0387067
IMZ28_RS02610	guaA	glutamine-hydrolyzing GMP synthase && PF02540:NAD synthase|PF00117:Glutamine amidotransferase class-I|PF00958:GMP synthase C terminal domain	2408.79	1213.19	1.98568	0.00529074
IMZ28_RS01845		HAMP domain-containing histidine kinase && PF00672:HAMP domain|PF02518:Histidine kinase-, DNA gyrase B-, and HSP90-like ATPase	415.208	209.284	1.98462	0.00331728
IMZ28_RS08990	secF	protein translocase subunit SecF && PF07549:SecD/SecF GG Motif|PF02355:Protein export membrane protein	2095.72	1056.8	1.98321	0.0116722
IMZ28_RS00470		DNA mismatch repair protein && PF00488:MutS domain V|PF01624:MutS domain I|PF05192:MutS domain III	913.912	461.097	1.98106	0.000116654
IMZ28_RS08385		response regulator && PF00072:Response regulator receiver domain	375.327	189.395	1.97949	0.00147741
IMZ28_RS08940		endonuclease MutS2 && PF00488:MutS domain V|PF01713:Smr domain	1076.42	544.07	1.97832	5.12092e-06
IMZ28_RS03165	atpA	F0F1 ATP synthase subunit alpha && PF00006:ATP synthase alpha/beta family, nucleotide-binding domain|PF00306:ATP synthase alpha/beta chain, C terminal domain|PF02874:ATP synthase alpha/beta family, beta-barrel domain	15374	7781.54	1.97569	0.000781139
IMZ28_RS08975		PatB family C-S lyase && PF00155:Aminotransferase class I and II	484.514	245.49	1.97362	1.16174e-05
IMZ28_RS01205		4-hydroxybenzoate polyprenyltransferase && PF01040:UbiA prenyltransferase family	582.022	295.457	1.97078	0.00204001
IMZ28_RS06260		DUF2130 domain-containing protein && PF09903:Uncharacterized protein conserved in bacteria (DUF2130)	763.776	387.243	1.97072	0.00218233
IMZ28_RS03920		imidazole glycerol phosphate synthase subunit HisF && PF00977:Histidine biosynthesis protein	273.319	139.052	1.96914	0.0172309
IMZ28_RS00775	rplP	50S ribosomal protein L16 && PF00252:Ribosomal protein L16p/L10e	5223.89	2660.36	1.96351	0.033928
IMZ28_RS04425		ThiF family adenylyltransferase && PF00899:ThiF family	296.877	151.568	1.95906	0.000730843
IMZ28_RS07350		molecular chaperone TorD family protein && PF02613:Nitrate reductase delta subunit	159.832	81.505	1.95784	0.00207902
IMZ28_RS08505	lysS	lysine--tRNA ligase && PF01336:OB-fold nucleic acid binding domain|PF00152:tRNA synthetases class II (D, K and N)	1677.6	859.809	1.95094	7.82577e-05
IMZ28_RS08405		DUF3482 domain-containing protein && PF11981:Domain of unknown function (DUF3482)|PF01926:50S ribosome-binding GTPase	416.809	213.979	1.94951	0.000336272
IMZ28_RS03630		ferredoxin--nitrite reductase && PF03460:Nitrite/Sulfite reductase ferredoxin-like half domain|PF01077:Nitrite and sulphite reductase 4Fe-4S domain	1953.82	1004.38	1.94504	0.0450595
IMZ28_RS10110		EAL domain-containing protein && PF00563:EAL domain	351.549	180.921	1.94441	0.0415425
IMZ28_RS10380		biotin synthase && PF06968:Biotin and Thiamin Synthesis associated domain|PF04055:Radical SAM superfamily	782.051	403.617	1.93752	0.000694198
IMZ28_RS00200		hypothetical protein && PF13425:O-antigen ligase like membrane protein	361.009	186.518	1.9351	0.00257457
IMZ28_RS03660	secA	preprotein translocase subunit SecA && PF07517:SecA DEAD-like domain|PF01043:SecA preprotein cross-linking domain|PF02810:SEC-C motif|PF07516:SecA Wing and Scaffold domain	6121.24	3169.65	1.93107	0.00526593
IMZ28_RS02520		insulinase family protein && PF05193:Peptidase M16 inactive domain|PF00675:Insulinase (Peptidase family M16)	1443.84	751.918	1.92034	0.00527685
IMZ28_RS01690		YihY family inner membrane protein && PF03631:Virulence factor BrkB	177.672	92.7433	1.92012	0.00594489
IMZ28_RS02230	xseA	exodeoxyribonuclease VII large subunit && PF02601:Exonuclease VII, large subunit|PF13742:OB-fold nucleic acid binding domain	329.951	172.211	1.91851	0.000168769
IMZ28_RS09860		ABC transporter permease && PF00528:Binding-protein-dependent transport system inner membrane component	400.36	209.304	1.91343	0.00657394
IMZ28_RS03100		RidA family protein && PF01042:Endoribonuclease L-PSP	1321.99	694.952	1.90259	0.0182243
IMZ28_RS09205	glyQ	glycine--tRNA ligase subunit alpha && PF02091:Glycyl-tRNA synthetase alpha subunit	741.001	389.516	1.90193	0.0013823
IMZ28_RS07975		TolC family protein && PF02321:Outer membrane efflux protein	875.949	461.733	1.89739	0.00270859
IMZ28_RS03960		polysaccharide export protein && PF02563:Polysaccharide biosynthesis/export protein|PF10531:SLBB domain	3213.84	1694.58	1.89617	0.00550816
IMZ28_RS05835	mtaB	tRNA (N(6)-L-threonylcarbamoyladenosine(37)-C(2))-methylthiotransferase MtaB && PF00919:Uncharacterized protein family UPF0004|PF04055:Radical SAM superfamily	705.278	372.103	1.89582	1.02082e-05
IMZ28_RS00740	rplC	50S ribosomal protein L3 && PF00297:Ribosomal protein L3	6351.69	3353.66	1.89387	0.000273093
IMZ28_RS06770		type I glyceraldehyde-3-phosphate dehydrogenase && PF00044:Glyceraldehyde 3-phosphate dehydrogenase, NAD binding domain|PF02800:Glyceraldehyde 3-phosphate dehydrogenase, C-terminal domain	309.865	163.532	1.89224	0.0421686
IMZ28_RS03595		hypothetical protein && -	135.027	71.5213	1.89163	0.00391405
IMZ28_RS08965		succinyldiaminopimelate transaminase && PF00155:Aminotransferase class I and II	751.301	397.179	1.89124	0.00597343
IMZ28_RS08280	glmS	glutamine--fructose-6-phosphate transaminase (isomerizing) && PF01380:SIS domain|PF13522:Glutamine amidotransferase domain	1816.61	963.085	1.88595	0.00327852
IMZ28_RS07095		hypothetical protein && -	317.127	168.581	1.88318	0.0197284
IMZ28_RS04090	gatB	Asp-tRNA(Asn)/Glu-tRNA(Gln) amidotransferase subunit GatB && PF02934:GatB/GatE catalytic domain|PF02637:GatB domain	3266.44	1736.92	1.88039	0.00130814
IMZ28_RS00760	rpsS	30S ribosomal protein S19 && PF00203:Ribosomal protein S19	3166.24	1683.89	1.88018	0.0415425
IMZ28_RS04860		phosphoribosyltransferase && PF00156:Phosphoribosyl transferase domain	705.567	375.851	1.87577	0.000746454
IMZ28_RS07820		glutathionylspermidine synthase family protein && PF03738:Glutathionylspermidine synthase preATP-grasp	578.544	309.773	1.868	0.00562611
IMZ28_RS02625		cation transporter && PF01545:Cation efflux family|PF16916:Dimerisation domain of Zinc Transporter	1070.18	573.321	1.86687	0.0491142
IMZ28_RS08070	sucC	ADP-forming succinate--CoA ligase subunit beta && PF08442:ATP-grasp domain|PF00549:CoA-ligase	4295.85	2306.44	1.86269	0.00933375
IMZ28_RS05185	purQ	phosphoribosylformylglycinamidine synthase subunit PurQ && PF13507:CobB/CobQ-like glutamine amidotransferase domain	2654.53	1430.57	1.85524	8.77389e-06
IMZ28_RS04990		nitrate reductase && -	159.301	85.7773	1.8539	0.0360742
IMZ28_RS05500		HAD family hydrolase && PF13419:Haloacid dehalogenase-like hydrolase	440.989	238.224	1.85141	0.00552466
IMZ28_RS01265		phosphoglycerate kinase && PF00162:Phosphoglycerate kinase	2316.68	1256.6	1.84371	0.0197587
IMZ28_RS08995	secD	protein translocase subunit SecD && PF02355:Protein export membrane protein	3766.28	2050.38	1.83691	0.00464519
IMZ28_RS04060	trpD	anthranilate phosphoribosyltransferase && PF00591:Glycosyl transferase family, a/b domain	1682.73	917.584	1.83364	0.0122733
IMZ28_RS08350		RecQ family ATP-dependent DNA helicase && PF00270:DEAD/DEAH box helicase|PF13361:UvrD-like helicase C-terminal domain|PF00580:UvrD/REP helicase N-terminal domain|PF00271:Helicase conserved C-terminal domain	1174.44	640.961	1.8319	0.000477905
IMZ28_RS10105	gyrB	DNA topoisomerase (ATP-hydrolyzing) subunit B && PF01751:Toprim domain|PF00986:DNA gyrase B subunit, carboxyl terminus|PF02518:Histidine kinase-, DNA gyrase B-, and HSP90-like ATPase|PF00204:DNA gyrase B	4463.55	2437.47	1.83106	5.84601e-06
IMZ28_RS06370		DNA recombination protein RecN && PF02463:RecF/RecN/SMC N terminal domain	859.769	470.528	1.82785	0.00478438
IMZ28_RS02030	metK	methionine adenosyltransferase && PF02773:S-adenosylmethionine synthetase, C-terminal domain|PF02772:S-adenosylmethionine synthetase, central domain|PF00438:S-adenosylmethionine synthetase, N-terminal domain	4152.68	2278.04	1.82313	3.25978e-05
IMZ28_RS05165		hypothetical protein && -	207.355	114.239	1.81943	0.00294749
IMZ28_RS06935		membrane integrity-associated transporter subunit PqiC && PF03886:ABC-type transport auxiliary lipoprotein component	628.609	345.3	1.81935	0.000269169
IMZ28_RS03240		L%2CD-transpeptidase family protein && PF03734:L,D-transpeptidase catalytic domain	573.617	316.038	1.81609	0.00116069
IMZ28_RS07480		fructosamine kinase family protein && PF03881:Fructosamine kinase	409.929	226.247	1.81085	0.00134656
IMZ28_RS10535		esterase-like activity of phytase family protein && PF13449:Esterase-like activity of phytase	418.693	232.185	1.80239	0.000191117
IMZ28_RS03915	hisH	imidazole glycerol phosphate synthase subunit HisH && PF00117:Glutamine amidotransferase class-I	206.652	115.019	1.80111	0.0169625
IMZ28_RS05825	bioV	pimelyl-ACP methyl ester esterase BioV && -	158.026	88.3024	1.79116	0.0122672
IMZ28_RS00405	rsmA	16S rRNA (adenine(1518)-N(6)/adenine(1519)-N(6))-dimethyltransferase RsmA && PF00398:Ribosomal RNA adenine dimethylase	1449.18	808.825	1.79098	0.00257457
IMZ28_RS02550		type II secretion system protein && -	1103.8	616.675	1.78907	0.00221528
IMZ28_RS09435		Lrp/AsnC family transcriptional regulator && -	1007.74	563.771	1.78717	0.0153966
IMZ28_RS05195		phosphoribosylaminoimidazolesuccinocarboxamide synthase && PF01259:SAICAR synthetase	2656.8	1486.81	1.78695	0.00015066
IMZ28_RS04160		SEL1-like repeat protein && -	165.21	92.7781	1.78352	0.0269975
IMZ28_RS10400	eno	phosphopyruvate hydratase && PF03952:Enolase, N-terminal domain|PF00113:Enolase, C-terminal TIM barrel domain	3640.99	2046.75	1.77874	0.000335779
IMZ28_RS09260	alaS	alanine--tRNA ligase && PF02272:DHHA1 domain|PF07973:Threonyl and Alanyl tRNA synthetase second additional domain|PF01411:tRNA synthetases class II (A)	2872.6	1615.22	1.77813	0.0043694
IMZ28_RS08730	queA	tRNA preQ1(34) S-adenosylmethionine ribosyltransferase-isomerase QueA && PF02547:Queuosine biosynthesis protein	295.931	166.76	1.77751	0.00804986
IMZ28_RS09330		nitrite/sulfite reductase && PF03460:Nitrite/Sulfite reductase ferredoxin-like half domain|PF01077:Nitrite and sulphite reductase 4Fe-4S domain	773.175	435.367	1.77629	0.000159087
IMZ28_RS08120	efp	elongation factor P && PF09285:Elongation factor P, C-terminal|PF08207:Elongation factor P (EF-P) KOW-like domain|PF01132:Elongation factor P (EF-P) OB domain	1597.55	900.356	1.7746	0.00559916
IMZ28_RS06115		Sua5 YciO YrdC YwlC family protein && -	154.155	87.0857	1.77136	0.0352425
IMZ28_RS06950		ABC transporter permease && PF13466:STAS domain|PF02405:Permease MlaE	917.113	518.455	1.76918	0.000688465
IMZ28_RS05175		1-acyl-sn-glycerol-3-phosphate acyltransferase && PF01553:Acyltransferase	697.962	394.89	1.76816	4.17171e-05
IMZ28_RS08665		diguanylate cyclase && PF00072:Response regulator receiver domain|PF00990:Diguanylate cyclase, GGDEF domain|PF13426:PAS domain	1190.54	673.374	1.76739	0.00269176
IMZ28_RS01010		hypothetical protein && -	235.129	133.273	1.76645	0.0118115
IMZ28_RS08880		tandem-95 repeat protein && PF16184:Cadherin-like|PF00082:Subtilase family	7421.5	4202.67	1.76576	0.0108212
IMZ28_RS09240		PBP1A family penicillin-binding protein && PF00905:Penicillin binding protein transpeptidase domain|PF00912:Transglycosylase	1507.39	854.333	1.76414	0.00302323
IMZ28_RS02950	trpB	tryptophan synthase subunit beta && PF00291:Pyridoxal-phosphate dependent enzyme	2203.48	1251.33	1.7606	0.0112045
IMZ28_RS02265		hypothetical protein && -	7143.27	4058.74	1.75998	0.0105602
IMZ28_RS09655		LL-diaminopimelate aminotransferase && PF00155:Aminotransferase class I and II	2486.04	1412.91	1.75959	0.0222451
IMZ28_RS02070		DNA polymerase III subunit gamma/tau && PF13177:DNA polymerase III, delta subunit	1418.84	806.708	1.75843	0.000213605
IMZ28_RS04225	gltB	glutamate synthase large subunit && PF01645:Conserved region in glutamate synthase|PF04898:Glutamate synthase central domain|PF00310:Glutamine amidotransferases class-II|PF01493:GXGXG motif	12533.9	7130.46	1.75772	0.0059257
IMZ28_RS06375		NAD(+)/NADH kinase && PF01513:ATP-NAD kinase	1174.59	669.659	1.75376	0.0209942
IMZ28_RS04105		NAD(P)H-dependent glycerol-3-phosphate dehydrogenase && PF01210:NAD-dependent glycerol-3-phosphate dehydrogenase N-terminus|PF07479:NAD-dependent glycerol-3-phosphate dehydrogenase C-terminus	558.101	318.329	1.75202	0.0458391
IMZ28_RS02635	purD	phosphoribosylamine--glycine ligase && PF01071:Phosphoribosylglycinamide synthetase, ATP-grasp (A) domain|PF02843:Phosphoribosylglycinamide synthetase, C domain|PF02844:Phosphoribosylglycinamide synthetase, N domain	2256.64	1294.23	1.74399	0.00573953
IMZ28_RS01195	miaA	tRNA (adenosine(37)-N6)-dimethylallyltransferase MiaA && PF01715:IPP transferase	222.661	128.061	1.74315	0.0416622
IMZ28_RS04095		NAD-binding protein && PF02254:TrkA-N domain|PF00520:Ion transport protein|PF02080:TrkA-C domain	860.071	493.646	1.74158	0.000807078
IMZ28_RS01135	nuoD	NADH dehydrogenase (quinone) subunit D && PF00346:Respiratory-chain NADH dehydrogenase, 49 Kd subunit	5172.63	2982.49	1.73426	0.0330627
IMZ28_RS07640		insulinase family protein && PF05193:Peptidase M16 inactive domain|PF00675:Insulinase (Peptidase family M16)	1233.04	711.584	1.73321	0.0036077
IMZ28_RS09915		hypothetical protein && -	604.578	351.116	1.7234	0.0233306
IMZ28_RS07730	hemA	glutamyl-tRNA reductase && PF00745:Glutamyl-tRNAGlu reductase, dimerisation domain|PF05201:Glutamyl-tRNAGlu reductase, N-terminal domain|PF01488:Shikimate / quinate 5-dehydrogenase	1681.27	976.44	1.72176	3.10432e-05
IMZ28_RS04150		Jag N-terminal domain-containing protein && PF14804:Jag N-terminus	1564.03	910.857	1.71723	0.00117699
IMZ28_RS05350		helicase && PF00271:Helicase conserved C-terminal domain|PF12513:Mitochondrial degradasome RNA helicase subunit C terminal	1828.52	1068.83	1.71031	0.0094251
IMZ28_RS07125		DUF4407 domain-containing protein && PF14362:Domain of unknown function (DUF4407)	393.118	229.999	1.7089	0.0271155
IMZ28_RS08955	murC	UDP-N-acetylmuramate--L-alanine ligase && PF08245:Mur ligase middle domain|PF02875:Mur ligase family, glutamate ligase domain|PF01225:Mur ligase family, catalytic domain	688.753	406.192	1.69628	0.00395638
IMZ28_RS10755	dapF	diaminopimelate epimerase && PF01678:Diaminopimelate epimerase	809.019	476.697	1.696	0.0298258
IMZ28_RS05415		hypothetical protein && -	1012.13	597.931	1.69243	0.000296016
IMZ28_RS05775		SulP family inorganic anion transporter && PF00916:Sulfate permease family|PF01740:STAS domain	578.867	342.322	1.69033	0.00667304
IMZ28_RS10025		MATE family efflux transporter && PF01554:MatE	279.536	165.668	1.6883	0.0260843
IMZ28_RS01210		sigma-70 family RNA polymerase sigma factor && -	151.292	90.0917	1.67974	0.011218
IMZ28_RS08490		type IV pilus twitching motility protein PilT && PF00437:Type II/IV secretion system protein	1691.18	1010.72	1.67272	0.000992654
IMZ28_RS08930		hypothetical protein && -	2163.43	1295.7	1.66956	0.000757857
IMZ28_RS04940	trpB	tryptophan synthase subunit beta && PF00291:Pyridoxal-phosphate dependent enzyme	2186.41	1310.35	1.66819	0.00138349
IMZ28_RS08865		VacB/RNase II family 3'-5' exoribonuclease && PF00773:RNB domain	2013.6	1206.81	1.66812	0.0142636
IMZ28_RS05815		3-methyladenine DNA glycosylase && PF00730:HhH-GPD superfamily base excision DNA repair protein	205.819	123.408	1.66717	0.0439402
IMZ28_RS07655	pgsA	CDP-diacylglycerol--glycerol-3-phosphate 3-phosphatidyltransferase && PF01066:CDP-alcohol phosphatidyltransferase	823.765	494.256	1.6669	0.00569389
IMZ28_RS10050	purT	formate-dependent phosphoribosylglycinamide formyltransferase && PF02222:ATP-grasp domain	1763.83	1060.36	1.66285	0.00132789
IMZ28_RS03840		aminotransferase class III-fold pyridoxal phosphate-dependent enzyme && PF00202:Aminotransferase class-III	822.889	496.561	1.65816	0.0113006
IMZ28_RS07040		DEAD/DEAH box helicase family protein && PF04851:Type III restriction enzyme, res subunit|PF08463:EcoEI R protein C-terminal|PF00271:Helicase conserved C-terminal domain	804.877	485.924	1.65645	0.00185016
IMZ28_RS06955	speA	biosynthetic arginine decarboxylase && PF00278:Pyridoxal-dependent decarboxylase, C-terminal sheet domain|PF02784:Pyridoxal-dependent decarboxylase, pyridoxal binding domain	1194.2	721.575	1.6542	0.00483843
IMZ28_RS08050		2-oxoglutarate synthase subunit alpha && PF01855:Pyruvate flavodoxin/ferredoxin oxidoreductase, thiamine diP-bdg	17981.8	10910.8	1.64805	0.00579483
IMZ28_RS05855	tgt	tRNA guanosine(34) transglycosylase Tgt && PF01702:Queuine tRNA-ribosyltransferase	1482.56	900.941	1.6453	0.0151987
IMZ28_RS03005		NAD(P)/FAD-dependent oxidoreductase && PF07992:Pyridine nucleotide-disulphide oxidoreductase	1071.13	651.365	1.64356	0.00395638
IMZ28_RS05900		DEAD/DEAH box helicase && PF00271:Helicase conserved C-terminal domain|PF00270:DEAD/DEAH box helicase	3560.15	2171.98	1.63883	0.0108294
IMZ28_RS06185		TRAP transporter substrate-binding protein && PF03480:Bacterial extracellular solute-binding protein, family 7	1519.51	928.348	1.63609	0.00662064
IMZ28_RS08335	thiC	phosphomethylpyrimidine synthase ThiC && PF01964:Radical SAM ThiC family|PF13667:ThiC-associated domain	5338.83	3263.46	1.63583	0.0375711
IMZ28_RS02820		thioredoxin domain-containing protein && PF03190:Protein of unknown function, DUF255	1430.89	876.156	1.6329	0.0409086
IMZ28_RS07585		murein L%2CD-transpeptidase && PF03734:L,D-transpeptidase catalytic domain	195.983	119.986	1.63214	0.0180082
IMZ28_RS10670		PDZ domain-containing protein && PF13180:PDZ domain	663.243	407.146	1.62901	0.0029911
IMZ28_RS07270		molybdopterin-dependent oxidoreductase && PF01568:Molydopterin dinucleotide binding domain|PF04879:Molybdopterin oxidoreductase Fe4S4 domain|PF00384:Molybdopterin oxidoreductase	540.319	332.71	1.62242	0.0178027
IMZ28_RS03075		homoserine O-acetyltransferase && PF00561:alpha/beta hydrolase fold	845.892	522.3	1.61935	0.00344239
IMZ28_RS06690		hydrogenase && -	1485.9	919.146	1.61709	0.010314
IMZ28_RS10770		VWA domain-containing protein && PF13519:von Willebrand factor type A domain	1452.94	898.511	1.61707	0.00527685
IMZ28_RS01575		3'-5' exonuclease && PF00929:Exonuclease	554.846	343.1	1.61639	0.00183176
IMZ28_RS07805	ftsA	cell division protein FtsA && PF14450:Cell division protein FtsA|PF02491:SHS2 domain inserted in FTSA	5078.67	3145.14	1.61456	0.00867549
IMZ28_RS10675		hypothetical protein && -	625.749	387.748	1.61288	0.0456024
IMZ28_RS08285		peptidoglycan-binding protein && PF01471:Putative peptidoglycan binding domain	2911.57	1807.23	1.61074	0.0276308
IMZ28_RS08700		HobA family DNA replication regulator && PF12163:DNA replication regulator	868.295	539.196	1.61061	0.00723351
IMZ28_RS06225		HAMP domain-containing histidine kinase && PF02518:Histidine kinase-, DNA gyrase B-, and HSP90-like ATPase|PF00512:His Kinase A (phospho-acceptor) domain	106.132	66.1101	1.6101	0.049697
IMZ28_RS07710	hemC	hydroxymethylbilane synthase && PF03900:Porphobilinogen deaminase, C-terminal domain|PF01379:Porphobilinogen deaminase, dipyromethane cofactor binding domain	2569.24	1597.58	1.60812	0.0107409
IMZ28_RS10740		YeiH family putative sulfate export transporter && PF03601:Conserved hypothetical protein 698	1136.28	707.49	1.6068	0.0136314
IMZ28_RS10170	rplK	50S ribosomal protein L11 && PF03946:Ribosomal protein L11, N-terminal domain|PF00298:Ribosomal protein L11, RNA binding domain	4339.8	2705.71	1.60387	0.00504756
IMZ28_RS09590		prohibitin family protein && PF01145:SPFH domain / Band 7 family	1155.5	722.396	1.59995	0.0490506
IMZ28_RS10150	rpoB	DNA-directed RNA polymerase subunit beta && PF04565:RNA polymerase Rpb2, domain 3|PF04560:RNA polymerase Rpb2, domain 7|PF00562:RNA polymerase Rpb2, domain 6|PF04563:RNA polymerase beta subunit|PF04561:RNA polymerase Rpb2, domain 2|PF10385:RNA polymerase beta subunit external 1 domain	10709	6699.48	1.59847	0.0222072
IMZ28_RS02980		peptidylprolyl isomerase && PF00639:PPIC-type PPIASE domain	5157.49	3234.05	1.59475	0.0491215
IMZ28_RS09610	dapB	4-hydroxy-tetrahydrodipicolinate reductase && PF01113:Dihydrodipicolinate reductase, N-terminus|PF05173:Dihydrodipicolinate reductase, C-terminus	1662.4	1043.66	1.59271	0.0319001
IMZ28_RS02290	hisA	1-(5-phosphoribosyl)-5-[(5-phosphoribosylamino)methylideneamino]imidazole-4-carboxamide isomerase && PF00977:Histidine biosynthesis protein	772.223	485.124	1.59156	0.0421686
IMZ28_RS10195	tuf	elongation factor Tu && PF03144:Elongation factor Tu domain 2|PF03143:Elongation factor Tu C-terminal domain|PF00009:Elongation factor Tu GTP binding domain	43202.5	27147.7	1.59138	0.0123334
IMZ28_RS07155		AAA family ATPase && PF10431:C-terminal, D2-small domain, of ClpB protein|PF07724:AAA domain (Cdc48 subfamily)	430.443	271.683	1.58392	0.0160219
IMZ28_RS02455	rho	transcription termination factor Rho && PF00006:ATP synthase alpha/beta family, nucleotide-binding domain|PF07498:Rho termination factor, N-terminal domain|PF07497:Rho termination factor, RNA-binding domain	2604.76	1648.19	1.58011	0.00398461
IMZ28_RS09645		YajQ family cyclic di-GMP-binding protein && PF04461:Protein of unknown function (DUF520)	1064.9	674.722	1.57899	0.0144024
IMZ28_RS04855	mltG	endolytic transglycosylase MltG && PF02618:YceG-like family	197.546	126.212	1.56662	0.048677
IMZ28_RS08790		TolC family protein && PF02321:Outer membrane efflux protein	1829.17	1168.72	1.56535	0.00772384
IMZ28_RS10155	rplL	50S ribosomal protein L7/L12 && PF00542:Ribosomal protein L7/L12 C-terminal domain|PF16320:Ribosomal protein L7/L12 dimerisation domain	6224.71	3977.87	1.56475	0.0116722
IMZ28_RS07750		hypothetical protein && -	358.011	231.03	1.54874	0.00597343
IMZ28_RS03160		F0F1 ATP synthase subunit delta && PF00213:ATP synthase delta (OSCP) subunit	3038.93	1962.26	1.54869	0.0072679
IMZ28_RS03820	pseB	UDP-N-acetylglucosamine 4%2C6-dehydratase (inverting) && PF02719:Polysaccharide biosynthesis protein	795.477	518.245	1.53555	0.0226477
IMZ28_RS10645	pyrE	orotate phosphoribosyltransferase && PF00156:Phosphoribosyl transferase domain	1709.14	1115.04	1.53277	0.0353902
IMZ28_RS07755		TonB-dependent receptor && -	2632.12	1717.23	1.53255	0.00334744
IMZ28_RS05840		mechanosensitive ion channel && PF00924:Mechanosensitive ion channel	925.905	604.868	1.53125	0.0083535
IMZ28_RS04580		tRNA pseudouridine(13) synthase TruD && PF01142:tRNA pseudouridine synthase D (TruD)	454.11	302.111	1.50288	0.0074229
IMZ28_RS05925		HAD family phosphatase && PF08282:haloacid dehalogenase-like hydrolase	457.976	306.72	1.49226	0.0165325
IMZ28_RS02640		RDD family protein && PF06271:RDD family	429.479	291.139	1.47592	0.0443686
IMZ28_RS05540		DUF2238 domain-containing protein && PF09997:Predicted membrane protein (DUF2238)	549.45	373.063	1.47379	0.0420612
IMZ28_RS06090	lpxA	acyl-ACP--UDP-N-acetylglucosamine O-acyltransferase && PF00132:Bacterial transferase hexapeptide (six repeats)|PF13720:Udp N-acetylglucosamine O-acyltransferase; Domain 2	1519.44	1033.29	1.47019	0.0158322
IMZ28_RS01230	gmk	guanylate kinase && PF00625:Guanylate kinase	593.54	404.849	1.4668	0.034857
IMZ28_RS08685	folP	dihydropteroate synthase && PF00809:Pterin binding enzyme	672.419	459.093	1.4642	0.0399486
IMZ28_RS04430	surE	5'/3'-nucleotidase SurE && PF01975:Survival protein SurE	471.208	322.141	1.46089	0.0455547
IMZ28_RS00545		response regulator transcription factor	242.544	167.191	1.44998	0.0367847
IMZ28_RS08080		malate dehydrogenase && PF02866:lactate/malate dehydrogenase, alpha/beta C-terminal domain|PF00056:lactate/malate dehydrogenase, NAD binding domain	2323.06	1611.85	1.44126	0.00955949
IMZ28_RS01040		peptidylprolyl isomerase && PF00639:PPIC-type PPIASE domain	646.741	451.883	1.43221	0.0360742
IMZ28_RS07025		N-6 DNA methylase && PF12161:HsdM N-terminal domain|PF02384:N-6 DNA Methylase	994.156	695.742	1.42902	0.0239936
IMZ28_RS01675	ispG	flavodoxin-dependent (E)-4-hydroxy-3-methylbut-2-enyl-diphosphate synthase && PF04551:GcpE protein	1533.91	1108.11	1.38401	0.01751
IMZ28_RS05045		sel1 repeat family protein && PF08238:Sel1 repeat	669.376	487.579	1.37296	0.0268935
IMZ28_RS07645	dapA	4-hydroxy-tetrahydrodipicolinate synthase && PF00701:Dihydrodipicolinate synthetase family	2053.09	1538.98	1.33399	0.0397196

## Sheet: S0 vs NaNO3 down
Table S2-4. 607 differentially up-expressed transcripts in S0 reduction vs NaNO3 reduction.
Gene ID	Gene name	Genedescription	S0 reduction	NaNO3 reduction	FoldChange	padj
sRNA00067		-	0.92499	205.204	-192.582	4.01411e-13
Novel00014		-	0.363772	53.3268	-134.891	4.62611e-06
sRNA00072		-	1.03587	106.448	-98.2739	1.32827e-09
IMZ28_RS02680		hypothetical protein && -	16.5314	952.546	-57.0928	1.18066e-13
IMZ28_RS00625		helix-turn-helix transcriptional regulator && PF01381:Helix-turn-helix	0	9.34461	-46.0316	0.000288995
Novel00018		PF04461:Protein of unknown function (DUF520)	25.9043	1071.48	-41.0373	4.53853e-24
sRNA00079		-	11.4442	448.724	-39.3137	2.54026e-10
IMZ28_RS00665		hypothetical protein && -	0.61666	25.2581	-35.6588	0.000130957
IMZ28_RS07210		DUF4395 family protein && PF14340:Domain of unknown function (DUF4395)	124.404	2894.54	-23.2211	2.00448e-49
sRNA00034		-	4.6924	88.6174	-18.825	3.45234e-05
IMZ28_RS07205		DUF2061 domain-containing protein && PF09834:Predicted membrane protein (DUF2061)	41.2828	754.597	-18.2654	9.5695e-39
IMZ28_RS08025		tyrosine-type recombinase/integrase && PF00589:Phage integrase family	0.443963	6.98967	-17.648	0.0115463
IMZ28_RS08345		oleate hydratase && PF06100:MCRA family	0.363772	6.91402	-17.4987	0.00867549
IMZ28_RS07200		phosphoadenylyl-sulfate reductase && PF01507:Phosphoadenosine phosphosulfate reductase family	65.7492	1141.53	-17.3792	1.5979e-55
sRNA00060		-	42.4227	711.772	-16.7704	2.09037e-09
Novel00003		-	354.765	5838.28	-16.4475	4.34781e-15
IMZ28_RS00315		arsenic transporter && PF02040:Arsenical pump membrane protein	25.762	393.32	-15.3304	2.83104e-25
Novel00017		PF00044:Glyceraldehyde 3-phosphate dehydrogenase, NAD binding domain	104.177	1557.95	-14.9303	2.20584e-16
sRNA00066		-	11.3457	163.783	-14.2696	6.8709e-13
IMZ28_RS07500		type II toxin-antitoxin system RelE/ParE family toxin && PF05973:Phage derived protein Gp49-like (DUF891)	239.523	3316.41	-13.846	5.45384e-06
IMZ28_RS07515		hypothetical protein && -	5.81484	81.7708	-13.4929	2.95293e-12
IMZ28_RS02795		hypothetical protein && -	1564.6	21105	-13.491	3.4478e-06
IMZ28_RS06885		hypothetical protein && -	311.434	4081.32	-13.1027	1.96229e-07
IMZ28_RS00670		DUF4297 domain-containing protein && PF14130:Domain of unknown function (DUF4297)	4.19937	56.3198	-12.532	3.31518e-07
IMZ28_RS07180		nitrite/sulfite reductase && PF01077:Nitrite and sulphite reductase 4Fe-4S domain|PF03460:Nitrite/Sulfite reductase ferredoxin-like half domain	641.64	7954.16	-12.3998	5.32256e-10
IMZ28_RS08030		hypothetical protein && -	0.980432	13.2454	-12.3298	0.00109015
Novel00015		PF08267:Cobalamin-independent synthase, N-terminal domain	41.7514	513.432	-12.2743	2.04806e-09
IMZ28_RS00655		hypothetical protein && -	10.6429	124.737	-11.5711	1.60681e-13
sRNA00011		-	15.4835	170.982	-11.1766	7.79513e-06
IMZ28_RS05105		superoxide dismutase && PF02777:Iron/manganese superoxide dismutases, C-terminal domain|PF00081:Iron/manganese superoxide dismutases, alpha-hairpin domain	491.485	5450.33	-11.0912	7.87732e-08
IMZ28_RS05635		hypothetical protein && -	34.6728	387.403	-11.0671	1.13343e-10
IMZ28_RS04525		AMP-binding protein && PF00501:AMP-binding enzyme	470.523	5095.87	-10.8321	1.30254e-05
IMZ28_RS03270		rubredoxin && PF00301:Rubredoxin	151.123	1596.17	-10.5619	9.84291e-07
IMZ28_RS07070		heme-binding domain-containing protein && PF14376:Haem-binding domain	375.147	3933.55	-10.4876	1.22169e-06
IMZ28_RS08020		hypothetical protein && -	0.752293	7.5411	-10.3164	0.0168703
IMZ28_RS00645		hypothetical protein && -	1.64022	15.0364	-10.0724	0.00103181
sRNA00038		-	15.5507	155.127	-10.0042	4.92188e-06
IMZ28_RS07195		phosphoadenylyl-sulfate reductase && PF01507:Phosphoadenosine phosphosulfate reductase family	121.732	1213.86	-10.0031	1.73045e-14
IMZ28_RS04485		hypothetical protein && -	15.2303	151.978	-9.86528	8.52058e-12
IMZ28_RS00725	ffs	signal recognition particle sRNA small type && -	5.17343	50.5496	-9.45673	2.90704e-07
IMZ28_RS07445		hypothetical protein && -	76.8856	698.092	-9.05468	5.29449e-10
IMZ28_RS02145		YfhL family 4Fe-4S dicluster ferredoxin && PF13237:4Fe-4S dicluster domain	302.034	2712.05	-8.967	1.1139e-12
IMZ28_RS07855		M48 family metallopeptidase && PF01435:Peptidase family M48|PF16491:CAAX prenyl protease N-terminal, five membrane helices	391.888	3404.74	-8.68746	1.21824e-06
IMZ28_RS02855		c-type cytochrome && PF00034:Cytochrome c	57.9004	500.118	-8.61874	4.7633e-11
IMZ28_RS05685		type II toxin-antitoxin system Phd/YefM family antitoxin && PF02604:Antitoxin Phd_YefM, type II toxin-antitoxin system	120.801	1033.13	-8.54564	4.36091e-05
IMZ28_RS07185	cysN	sulfate adenylyltransferase subunit CysN && PF00009:Elongation factor Tu GTP binding domain	1193.72	10167.6	-8.51899	2.74712e-06
IMZ28_RS05070		DoxX family protein && PF07681:DoxX	311.607	2624.63	-8.42589	8.57864e-06
sRNA00057		-	62.1425	516.459	-8.35555	3.11439e-11
IMZ28_RS06510		hypothetical protein && -	295.314	2460.61	-8.33442	1.37893e-07
IMZ28_RS07560		type II toxin-antitoxin system Phd/YefM family antitoxin && PF02604:Antitoxin Phd_YefM, type II toxin-antitoxin system	159.772	1321.58	-8.26704	0.000190251
IMZ28_RS04555		DUF2892 domain-containing protein && PF11127:Protein of unknown function (DUF2892)	79.2969	652.22	-8.18977	9.637e-17
IMZ28_RS07395		LysR family transcriptional regulator && PF03466:LysR substrate binding domain|PF00126:Bacterial regulatory helix-turn-helix protein, lysR family	83.8723	676.878	-8.05156	1.22901e-07
IMZ28_RS05645		transposase && PF01797:Transposase IS200 like	38.1563	308.975	-8.05128	4.26719e-16
IMZ28_RS08185		DUF1450 domain-containing protein && PF07293:Protein of unknown function (DUF1450)	14.2626	115.651	-7.95972	2.11207e-06
IMZ28_RS08640		DsrE family protein && PF02635:DsrE/DsrF-like family	20.4405	160.242	-7.84601	4.03462e-14
IMZ28_RS05690		type II toxin-antitoxin system RelE/ParE family toxin && PF05016:ParE toxin of type II toxin-antitoxin system, parDE	32.089	248.658	-7.72954	1.31298e-06
IMZ28_RS06490		SHOCT domain-containing protein && PF09851:Short C-terminal domain	297.782	2270.16	-7.62335	9.68196e-05
IMZ28_RS07555		type II toxin-antitoxin system RelE/ParE family toxin && PF05016:ParE toxin of type II toxin-antitoxin system, parDE	91.4019	695.594	-7.60543	2.81412e-05
IMZ28_RS00505		hypothetical protein && -	596.185	4481.87	-7.51815	0.000171859
sRNA00103		-	25.7377	189.641	-7.36236	1.58053e-13
IMZ28_RS00685		helix-turn-helix transcriptional regulator && PF01381:Helix-turn-helix	5.54357	42.3626	-7.35088	0.00114514
IMZ28_RS04255		tautomerase family protein && PF14552:Tautomerase enzyme	13.0413	95.6912	-7.31618	6.55093e-12
IMZ28_RS05785		rhodanese-like domain-containing protein && PF00581:Rhodanese-like domain	283.896	2073.09	-7.3054	7.81633e-06
IMZ28_RS03865		hypothetical protein && -	19.4672	144.704	-7.29848	1.44504e-06
IMZ28_RS09640		hypothetical protein && -	521.517	3619.99	-6.93649	1.21497e-07
IMZ28_RS07285		sodium-dependent tyrosine transporter && -	29.0254	203.107	-6.92474	0.00048905
IMZ28_RS08190		cupin domain-containing protein && PF07883:Cupin domain	224.297	1542.14	-6.87917	4.71266e-08
IMZ28_RS00675		hypothetical protein && -	87.5723	599.133	-6.82236	5.79733e-07
IMZ28_RS05905		cytochrome-c peroxidase && PF00034:Cytochrome c|PF03150:Di-haem cytochrome c peroxidase	1601.06	10837.5	-6.76853	4.57551e-05
sRNA00004		-	398.982	2663.83	-6.67313	8.99504e-07
Novel00010		-	209.612	1396.13	-6.65742	0.00108241
IMZ28_RS02965		hypothetical protein && -	70.7014	465.063	-6.566	0.000127059
IMZ28_RS00330		hypothetical protein && -	82.4597	541.25	-6.53449	1.0994e-08
sRNA00080		-	7.67045	48.5307	-6.4927	6.70669e-06
IMZ28_RS07190	cysD	sulfate adenylyltransferase subunit CysD && PF01507:Phosphoadenosine phosphosulfate reductase family	1093.46	7088.93	-6.48465	1.10406e-05
IMZ28_RS07600		hypothetical protein && -	274.993	1759.73	-6.39962	3.59367e-06
IMZ28_RS01490		nitrous oxide reductase accessory protein NosL && PF05573:NosL	303.056	1908.21	-6.29502	4.90147e-08
IMZ28_RS05885		hypothetical protein && -	56.6795	356.907	-6.28591	1.02678e-17
sRNA00107		-	52.5664	327.128	-6.23814	5.35867e-08
IMZ28_RS02800		hypothetical protein && -	1120.76	6871.19	-6.13219	0.000660628
IMZ28_RS08195		carbon-nitrogen hydrolase family protein && PF00795:Carbon-nitrogen hydrolase	377.318	2307.3	-6.11636	0.000155612
Novel00007		PF00216:Bacterial DNA-binding protein	96.5502	583.873	-6.03586	7.32094e-05
IMZ28_RS07695		transcriptional repressor && PF01475:Ferric uptake regulator family	223.375	1338.77	-5.98101	4.37088e-21
IMZ28_RS05140		hypothetical protein && -	122.511	729.144	-5.94054	8.98418e-05
sRNA00048		-	38.2296	227.114	-5.92503	3.16419e-05
IMZ28_RS00640		Fic family protein && PF02661:Fic/DOC family|PF13776:Domain of unknown function (DUF4172)	130.872	774.456	-5.91058	1.89728e-05
sRNA00017		-	42.8247	253.21	-5.86441	2.05522e-07
IMZ28_RS01485		nitrous oxide reductase accessory protein NosL && PF05573:NosL	1783.17	10456.2	-5.86415	6.02184e-07
IMZ28_RS00650		hypothetical protein && -	2.17669	12.653	-5.80771	0.004754
IMZ28_RS00680		hypothetical protein && -	1.47984	8.46125	-5.78156	0.0180082
Novel00004		-	317.177	1807.5	-5.70104	3.64524e-08
sRNA00018		-	77.158	442.275	-5.69364	3.84673e-10
IMZ28_RS07505		putative addiction module antidote protein && -	321.37	1816.81	-5.65395	0.0043694
IMZ28_RS07520		hypothetical protein && -	63.1115	355.408	-5.62684	3.17919e-10
IMZ28_RS05240		superoxide dismutase && PF02777:Iron/manganese superoxide dismutases, C-terminal domain|PF00081:Iron/manganese superoxide dismutases, alpha-hairpin domain	1127.07	6327.09	-5.61474	0.000194151
IMZ28_RS01965		ATP-dependent Clp protease adaptor ClpS && PF02617:ATP-dependent Clp protease adaptor protein ClpS	522.707	2897.23	-5.54134	8.24877e-07
IMZ28_RS00720		tRNA-Ser && -	16.6615	93.1426	-5.49278	3.43099e-05
IMZ28_RS02140		Ppx/GppA family phosphatase && PF02541:Ppx/GppA phosphatase family	466.55	2517.41	-5.39448	1.96858e-08
IMZ28_RS00880		NifU family protein && PF01106:NifU-like domain	1017.43	5472.91	-5.38013	1.35457e-10
IMZ28_RS09325		hypothetical protein && -	56.6488	304.513	-5.33499	3.53361e-06
IMZ28_RS04800		VOC family protein && PF12681:Glyoxalase-like domain	266.12	1416.29	-5.32468	2.31306e-05
IMZ28_RS07850	prmC	peptide chain release factor N(5)-glutamine methyltransferase && PF05175:Methyltransferase small domain	204.593	1077	-5.26081	0.00083635
IMZ28_RS05100	metK	methionine adenosyltransferase && PF02772:S-adenosylmethionine synthetase, central domain|PF02773:S-adenosylmethionine synthetase, C-terminal domain|PF00438:S-adenosylmethionine synthetase, N-terminal domain	647.28	3372.92	-5.21195	6.01124e-05
IMZ28_RS01495		hypothetical protein && -	101.297	520.062	-5.12887	2.29261e-06
IMZ28_RS00535		globin && PF01152:Bacterial-like globin	275.416	1406.08	-5.10324	8.6464e-07
IMZ28_RS06505		hypothetical protein && -	696.237	3549.04	-5.09864	0.00121776
Novel00001		-	114.041	577.489	-5.06304	0.000164889
IMZ28_RS04605	msrA	peptide-methionine (S)-S-oxide reductase MsrA && PF01625:Peptide methionine sulfoxide reductase	288.975	1450.94	-5.02367	4.0105e-20
IMZ28_RS08545		toxin-antitoxin system YwqK family antitoxin && -	80.2029	401.429	-4.99999	1.51092e-08
sRNA00087		-	202.468	1013.38	-4.99862	0.00333095
IMZ28_RS08945		helix-turn-helix domain-containing protein && PF12833:Helix-turn-helix domain	474.548	2361.73	-4.97762	9.45202e-05
IMZ28_RS07570		META domain-containing protein && PF03724:META domain	106.747	529.774	-4.96024	7.18808e-10
IMZ28_RS02810		hypothetical protein && -	297.562	1472.26	-4.95051	0.00483674
sRNA00054		-	50.1741	248.751	-4.94968	0.000757676
IMZ28_RS02700		ferritin-like domain-containing protein && PF00210:Ferritin-like domain	703.544	3478.78	-4.94589	2.55959e-07
IMZ28_RS04935		GIY-YIG nuclease family protein && PF14267:Domain of unknown function (DUF4357)	191.411	947.372	-4.94091	3.29606e-07
IMZ28_RS02805		hypothetical protein && -	473.04	2326.04	-4.91934	0.004754
IMZ28_RS06875		tRNA-Leu && -	10.7417	53.6615	-4.86893	0.000668201
IMZ28_RS10855		ATP-binding protein && PF13335:Magnesium chelatase, subunit ChlI C-terminal|PF01078:Magnesium chelatase, subunit ChlI|PF13541:Subunit ChlI of Mg-chelatase	21.7173	106.792	-4.85082	2.38201e-07
IMZ28_RS00055		hypothetical protein && -	87.6829	424.955	-4.83598	8.39982e-06
IMZ28_RS04980		cytochrome c && PF13442:Cytochrome C oxidase, cbb3-type, subunit III	31.5767	153.578	-4.82925	2.51341e-07
sRNA00010		-	179.325	855.377	-4.7718	5.40451e-10
IMZ28_RS03885		sugar nucleotide-binding protein && PF04321:RmlD substrate binding domain	18.4063	88.2824	-4.75879	3.28265e-05
IMZ28_RS01855	hemN	oxygen-independent coproporphyrinogen III oxidase && PF04055:Radical SAM superfamily|PF06969:HemN C-terminal domain	2167.23	10312.2	-4.75832	4.32722e-08
IMZ28_RS07540		hypothetical protein && -	122.935	582.603	-4.7334	0.000126554
IMZ28_RS06880		tRNA-Gly && -	133.362	630.362	-4.73174	1.43002e-07
IMZ28_RS01045		tRNA-Ala && -	4.31025	21.4344	-4.70544	0.00220413
IMZ28_RS07525		hypothetical protein && -	32.8416	155.842	-4.69861	7.11959e-06
IMZ28_RS00920	panD	aspartate 1-decarboxylase && PF02261:Aspartate decarboxylase	1166.48	5456.64	-4.6769	2.8455e-21
IMZ28_RS00715		NADAR family protein && PF08719:Domain of unknown function (DUF1768)	17.2841	82.6472	-4.6718	1.94748e-05
IMZ28_RS04925		IS110 family transposase && PF01548:Transposase|PF02371:Transposase IS116/IS110/IS902 family	9.48368	45.0564	-4.60384	0.000206751
IMZ28_RS00710		hypothetical protein && -	29.376	136.364	-4.58928	0.000419006
IMZ28_RS10900		hypothetical protein && PF13541:Subunit ChlI of Mg-chelatase	37.3548	173.237	-4.58798	1.99473e-06
IMZ28_RS04035		hypothetical protein && -	72.3304	333.92	-4.58621	1.74185e-06
IMZ28_RS07960	acpS	holo-ACP synthase && PF01648:4'-phosphopantetheinyl transferase superfamily	74.2102	340.316	-4.55308	1.37893e-07
IMZ28_RS01655		prepilin-type N-terminal cleavage/methylation domain-containing protein && PF13544:Type IV pilin N-term methylation site GFxxxE	151.711	688.506	-4.53065	8.23636e-05
IMZ28_RS06070	amrS	AmmeMemoRadiSam system radical SAM enzyme && PF04055:Radical SAM superfamily	3133.45	14178	-4.52486	0.00146652
IMZ28_RS05030		tRNA-Ser && -	18.8127	83.968	-4.4927	1.01459e-08
IMZ28_RS03215		TIGR01777 family oxidoreductase && PF08338:Domain of unknown function (DUF1731)|PF01370:NAD dependent epimerase/dehydratase family	509.286	2276.54	-4.4717	1.63422e-06
IMZ28_RS10120		hypothetical protein && -	167.664	750.35	-4.46922	4.92753e-07
IMZ28_RS06945		ATP-binding cassette domain-containing protein && PF07673:Protein of unknown function (DUF1602)|PF00005:ABC transporter	556.537	2470.93	-4.43985	0.00177756
IMZ28_RS08460		DUF255 domain-containing protein && PF03190:Protein of unknown function, DUF255	448.826	1980.85	-4.412	7.75461e-09
IMZ28_RS09150	trmD	tRNA (guanosine(37)-N1)-methyltransferase TrmD && PF01746:tRNA (Guanine-1)-methyltransferase	538.967	2374.48	-4.40808	6.16617e-12
IMZ28_RS08365		multicopper oxidase family protein && PF07732:Multicopper oxidase|PF00394:Multicopper oxidase|PF07731:Multicopper oxidase	791.904	3475.6	-4.38965	0.00145509
IMZ28_RS00500		DoxX family protein && PF07681:DoxX	949.043	4085.81	-4.30528	0.0021658
sRNA00023		-	231.168	995.359	-4.30013	2.11878e-17
IMZ28_RS10250		thioredoxin domain-containing protein && PF03190:Protein of unknown function, DUF255	579.289	2482.39	-4.28485	1.49879e-08
IMZ28_RS10845		NifS family cysteine desulfurase && PF00266:Aminotransferase class-V	7430.65	31741.1	-4.27194	2.96992e-16
IMZ28_RS05715		phosphoglycolate phosphatase && PF13419:Haloacid dehalogenase-like hydrolase	289.63	1232.97	-4.25618	1.26464e-05
IMZ28_RS08455		HAMP domain-containing histidine kinase && PF02518:Histidine kinase-, DNA gyrase B-, and HSP90-like ATPase|PF00512:His Kinase A (phospho-acceptor) domain	399.789	1700.99	-4.25244	1.52454e-10
IMZ28_RS05275		transposase && PF01797:Transposase IS200 like	41.5415	176.845	-4.24393	0.000184318
IMZ28_RS05505		hypothetical protein && -	338.781	1437.17	-4.24274	0.000210025
IMZ28_RS09495		iron-sulfur cluster assembly scaffold protein && PF01592:NifU-like N terminal domain	823.349	3470.57	-4.21649	8.83466e-05
IMZ28_RS04540		acyl-CoA dehydrogenase && PF02770:Acyl-CoA dehydrogenase, middle domain|PF02771:Acyl-CoA dehydrogenase, N-terminal domain|PF00441:Acyl-CoA dehydrogenase, C-terminal domain|PF09317:Domain of unknown function (DUF1974)	867.815	3649.06	-4.20542	0.00180904
IMZ28_RS07615		outer membrane beta-barrel protein && PF13505:Outer membrane protein beta-barrel domain	2143.74	8939.22	-4.17	0.0148708
IMZ28_RS05665		glycosyltransferase family 2 protein && PF00535:Glycosyl transferase family 2	115.4	481.02	-4.15356	5.6094e-06
IMZ28_RS06960	cysE	serine O-acetyltransferase && PF00132:Bacterial transferase hexapeptide (six repeats)	559.915	2325.02	-4.15261	5.20274e-07
IMZ28_RS04295		pyridoxamine 5'-phosphate oxidase family protein && PF01243:Pyridoxamine 5'-phosphate oxidase	213.929	887.401	-4.14523	0.000265081
IMZ28_RS08180		ABC-F family ATP-binding cassette domain-containing protein && PF12848:ABC transporter|PF00005:ABC transporter	375.389	1556.6	-4.14471	8.61575e-10
IMZ28_RS02465		hypothetical protein && -	20.1203	82.9602	-4.13153	5.7453e-05
IMZ28_RS05145		hypothetical protein && -	1215.11	5012.38	-4.12519	3.29606e-07
IMZ28_RS02285		50S ribosomal protein L11 methyltransferase && PF06325:Ribosomal protein L11 methyltransferase (PrmA)	640.75	2622.77	-4.09269	6.15203e-06
IMZ28_RS02725		Rrf2 family transcriptional regulator && PF02082:Transcriptional regulator	209.194	857.853	-4.09253	9.28386e-16
IMZ28_RS06560		hypothetical protein && -	619.9	2507.39	-4.04497	0.00739365
IMZ28_RS08805		TlpA family protein disulfide reductase && PF13905:Thioredoxin-like	704.421	2844.8	-4.03819	0.00213341
IMZ28_RS03425		YkgJ family cysteine cluster protein && PF03692:Putative zinc- or iron-chelating domain	136.778	550.317	-4.01809	9.49167e-06
IMZ28_RS05255		WYL domain-containing protein && PF13280:WYL domain	119.105	477.301	-4.01801	2.67039e-08
sRNA00045		-	18.7324	75.04	-3.96463	0.000196997
IMZ28_RS01220		tRNA-Arg && -	38.2118	149.714	-3.9207	2.13139e-08
IMZ28_RS00540		bifunctional methionine sulfoxide reductase B/A protein && PF01641:SelR domain|PF01625:Peptide methionine sulfoxide reductase	541.474	2115.51	-3.90752	0.00667304
IMZ28_RS03475		thioredoxin family protein && -	106.878	417.598	-3.90328	7.81783e-05
IMZ28_RS07175		PAS domain-containing protein && PF08447:PAS fold	261.716	1020.68	-3.90062	8.38325e-13
IMZ28_RS05655		GNAT family N-acetyltransferase && PF13508:Acetyltransferase (GNAT) domain	42.701	168.04	-3.89773	5.15405e-07
IMZ28_RS01725		hypothetical protein && -	126.32	491.22	-3.87158	2.82889e-10
IMZ28_RS01280		hypothetical protein && -	212.464	822.705	-3.86272	3.05623e-06
IMZ28_RS09470		phosphatase PAP2 family protein && PF01569:PAP2 superfamily	278.195	1071.15	-3.84761	0.000206515
IMZ28_RS05005		c-type cytochrome && -	48.9844	187.929	-3.83605	0.00118312
IMZ28_RS05695		hypothetical protein && -	176.709	677.893	-3.83509	0.00149875
IMZ28_RS06075	lpxB	lipid-A-disaccharide synthase && PF02684:Lipid-A-disaccharide synthetase	266.752	1021.47	-3.83076	6.64491e-07
IMZ28_RS07510		transposase && -	21.0088	81.2444	-3.80285	0.00308636
IMZ28_RS03710		YdiU family protein && PF02696:Uncharacterized ACR, YdiU/UPF0061 family	366.59	1386.55	-3.78289	0.0114742
sRNA00085		-	23.4255	87.0828	-3.74653	6.37039e-05
sRNA00035		-	432.325	1595.93	-3.69289	0.0112045
IMZ28_RS08465	dapE	succinyl-diaminopimelate desuccinylase && PF01546:Peptidase family M20/M25/M40|PF07687:Peptidase dimerisation domain	1182.31	4359.24	-3.68666	3.70486e-14
IMZ28_RS10730	mobA	molybdenum cofactor guanylyltransferase MobA && PF12804:MobA-like NTP transferase domain	174.195	641.068	-3.67631	0.00160302
IMZ28_RS00660		- && PF01527:Transposase|PF00665:Integrase core domain	46.3204	169.325	-3.63398	0.000471398
IMZ28_RS01825	panB	3-methyl-2-oxobutanoate hydroxymethyltransferase && PF02548:Ketopantoate hydroxymethyltransferase	809.339	2937.86	-3.63214	3.85747e-21
IMZ28_RS00885		hypothetical protein && -	2025.41	7354.43	-3.6311	5.49785e-07
IMZ28_RS02960		CPXCG motif-containing cysteine-rich protein && PF14255:Cysteine-rich CPXCG	65.047	235.983	-3.62222	0.015789
IMZ28_RS08015		hypothetical protein && -	323.916	1172.45	-3.62058	0.00359604
IMZ28_RS05400		toxin-antitoxin system YwqK family antitoxin && -	348.299	1259.39	-3.61468	0.00177756
IMZ28_RS09735		NifB/NifX family molybdenum-iron cluster-binding protein && PF02579:Dinitrogenase iron-molybdenum cofactor	413.333	1479.96	-3.5786	1.80535e-06
IMZ28_RS01600		hypothetical protein && -	181.589	647.914	-3.55779	8.98418e-05
IMZ28_RS00035		cytochrome b/b6 domain-containing protein && PF00033:Cytochrome b/b6/petB|PF09626:Dihaem cytochrome c	125.846	446.137	-3.53891	0.000697023
IMZ28_RS02895		CoA-binding protein && PF13380:CoA binding domain	1607.02	5647.14	-3.51484	8.05097e-14
IMZ28_RS05610		hypothetical protein && -	187.413	658.193	-3.50771	1.25415e-13
IMZ28_RS01415		energy transducer TonB && PF03544:Gram-negative bacterial TonB protein C-terminal	87.7623	305.888	-3.49667	1.04346e-08
IMZ28_RS02325		SGNH/GDSL hydrolase family protein && PF00657:GDSL-like Lipase/Acylhydrolase	52.3942	182.607	-3.47356	0.00175335
IMZ28_RS07455		response regulator transcription factor && PF00072:Response regulator receiver domain|PF00486:Transcriptional regulatory protein, C terminal	23.9431	82.709	-3.46952	5.2667e-05
IMZ28_RS02955		DUF1653 domain-containing protein && PF07866:Protein of unknown function (DUF1653)	101.525	351.615	-3.46058	0.00201978
IMZ28_RS08550		toxin-antitoxin system YwqK family antitoxin && -	80.8437	277.437	-3.44913	3.02944e-11
IMZ28_RS06230		response regulator transcription factor && PF00072:Response regulator receiver domain|PF00486:Transcriptional regulatory protein, C terminal	144.954	500.399	-3.44318	3.26078e-05
sRNA00083		-	416.573	1427.25	-3.42697	0.004754
IMZ28_RS06430		paraquat-inducible protein A && PF04403:Paraquat-inducible protein A	160.517	549.404	-3.42013	0.000513184
IMZ28_RS09740		hypothetical protein && -	32.428	111.313	-3.41264	2.79422e-05
IMZ28_RS01670		four helix bundle protein && PF05635:23S rRNA-intervening sequence protein	125.34	426.684	-3.39652	4.23794e-07
IMZ28_RS09100		hypothetical protein && -	290.318	985.64	-3.39479	0.00034631
IMZ28_RS01335		four helix bundle protein && PF05635:23S rRNA-intervening sequence protein	37.9165	129.931	-3.38627	0.000296016
IMZ28_RS09265		hypothetical protein && -	148.745	503.921	-3.38496	0.0105602
IMZ28_RS04725		DUF2062 domain-containing protein && PF09835:Uncharacterized protein conserved in bacteria (DUF2062)	167.437	567.066	-3.38027	0.00019931
IMZ28_RS10480		L%2CD-transpeptidase && PF03734:L,D-transpeptidase catalytic domain	329.622	1111.77	-3.37201	2.7681e-19
IMZ28_RS10825		hypothetical protein && -	97.3514	328.485	-3.35872	6.28863e-11
IMZ28_RS00585		tRNA-Cys && -	4.40882	14.6975	-3.35835	0.0269232
IMZ28_RS07090		metallophosphoesterase && PF00149:Calcineurin-like phosphoesterase	53.6029	181.016	-3.35583	1.33317e-07
sRNA00009		-	51.0002	168.164	-3.32797	0.000123873
IMZ28_RS04665		DUF4395 domain-containing protein && PF14340:Domain of unknown function (DUF4395)	500.594	1658.08	-3.31356	2.12823e-12
IMZ28_RS00045		hypothetical protein && -	76.3926	253.389	-3.30832	0.00109173
IMZ28_RS06290		hypothetical protein && -	1753.54	5794.36	-3.30456	0.000433209
IMZ28_RS05135		response regulator transcription factor && PF00486:Transcriptional regulatory protein, C terminal|PF00072:Response regulator receiver domain	238.684	788.196	-3.30216	0.000232958
IMZ28_RS05055		hypothetical protein && -	326.502	1073.48	-3.2876	0.00105653
IMZ28_RS00915		(2Fe-2S) ferredoxin domain-containing protein && -	4803.73	15683.1	-3.26506	2.01472e-14
IMZ28_RS10625		hypothetical protein && -	30.3437	100.116	-3.25645	0.000523428
IMZ28_RS08835		NfeD family protein && PF01957:NfeD-like C-terminal, partner-binding	466.071	1499.63	-3.21791	4.89593e-05
IMZ28_RS03375		3-isopropylmalate dehydratase small subunit && PF00694:Aconitase C-terminal domain	231.026	739.254	-3.19659	8.08635e-10
IMZ28_RS02765		chorismate mutase && PF01817:Chorismate mutase type II	278.73	889.887	-3.18933	0.00405157
IMZ28_RS00320		metalloregulator ArsR/SmtB family transcription factor && PF01022:Bacterial regulatory protein, arsR family	268.362	854.105	-3.18511	5.39665e-11
IMZ28_RS08535		hypothetical protein && -	545.26	1736.33	-3.18335	0.00784379
IMZ28_RS07700		peroxiredoxin && PF10417:C-terminal domain of 1-Cys peroxiredoxin|PF00578:AhpC/TSA family	4519.68	14365.6	-3.17834	5.2765e-05
IMZ28_RS03715		hypothetical protein && -	928.722	2950.77	-3.17774	1.59293e-05
IMZ28_RS04455		DUF3817 domain-containing protein && PF12823:Domain of unknown function (DUF3817)	444.267	1410.34	-3.17636	1.34804e-08
IMZ28_RS09845		HAD family hydrolase && PF13419:Haloacid dehalogenase-like hydrolase	337.437	1062.24	-3.14301	3.21042e-06
IMZ28_RS04900		DUF3303 family protein && PF11746:Protein of unknown function (DUF3303)	231.277	724.919	-3.13709	5.2211e-05
IMZ28_RS05425		GIY-YIG nuclease family protein && PF01541:GIY-YIG catalytic domain	71.5155	225.843	-3.13545	2.53939e-06
IMZ28_RS04905		hypothetical protein && -	126.652	397.341	-3.13537	2.5768e-12
IMZ28_RS02670		tRNA-Leu && -	81.653	256.096	-3.13494	6.40243e-05
IMZ28_RS05710		hypothetical protein && -	840.027	2631.78	-3.13191	2.92461e-10
IMZ28_RS05790		hypothetical protein && -	167.079	523.625	-3.12971	0.00289573
IMZ28_RS01850		(Fe-S)-binding protein && PF13534:4Fe-4S dicluster domain|PF02754:Cysteine-rich domain	1460.63	4554	-3.11803	2.55869e-07
IMZ28_RS05120		hypothetical protein && -	123.662	385.956	-3.11067	8.61575e-10
IMZ28_RS07415		sulfatase-like hydrolase/transferase && PF00884:Sulfatase	668.51	2071.06	-3.09746	1.70326e-06
IMZ28_RS05890		hypothetical protein && -	23.1852	72.4706	-3.09352	0.000579299
IMZ28_RS04700	folK	2-amino-4-hydroxy-6-hydroxymethyldihydropteridine diphosphokinase && PF01288:7,8-dihydro-6-hydroxymethylpterin-pyrophosphokinase (HPPK)	219.052	675.81	-3.08498	6.40601e-10
IMZ28_RS09485		anaerobic ribonucleoside-triphosphate reductase activating protein && PF04055:Radical SAM superfamily|PF13353:4Fe-4S single cluster domain	25.1824	77.5714	-3.08293	0.000140964
IMZ28_RS05550		DUF445 family protein && PF04286:Protein of unknown function (DUF445)	115.726	356.615	-3.08113	1.1374e-06
IMZ28_RS02690		IS256 family transposase && PF00872:Transposase, Mutator family	337.179	1032.5	-3.06247	4.71611e-09
IMZ28_RS10260		hypothetical protein && PF04324:BFD-like [2Fe-2S] binding domain	147.093	450.963	-3.05455	7.80501e-06
IMZ28_RS02410		hypothetical protein && -	32.5265	100.159	-3.04933	2.92579e-05
IMZ28_RS08375		Mrp/NBP35 family ATP-binding protein && PF10609:NUBPL iron-transfer P-loop NTPase|PF01883:Domain of unknown function DUF59	7088.81	21462.6	-3.02773	0.000232958
IMZ28_RS10935		FAD-dependent thymidylate synthase && PF02511:Thymidylate synthase complementing protein	377.91	1142.82	-3.02436	0.000121853
sRNA00058		-	299.178	903.761	-3.02213	0.00884793
IMZ28_RS00595		tRNA-Gly && -	79.8274	242.251	-3.02132	1.89899e-05
IMZ28_RS06390		outer membrane protein transport protein && PF03349:Outer membrane protein transport protein (OMPP1/FadL/TodX)	380.485	1144.85	-3.01185	1.86837e-05
IMZ28_RS07845	dtd	D-tyrosyl-tRNA(Tyr) deacylase && PF02580:D-Tyr-tRNA(Tyr) deacylase	166.565	500.936	-3.00555	1.04935e-05
IMZ28_RS10745		tRNA-Val && -	20.2682	61.0496	-3.00487	7.92347e-05
IMZ28_RS06160		exodeoxyribonuclease III && PF03372:Endonuclease/Exonuclease/phosphatase family	202.329	607.277	-3.00178	0.0106131
IMZ28_RS01870	ribA	GTP cyclohydrolase II && PF00925:GTP cyclohydrolase II	397.015	1192.32	-2.99925	7.90176e-08
IMZ28_RS00380		glycine zipper 2TM domain-containing protein && PF13488:Glycine zipper	1799.66	5393.89	-2.99718	0.0184789
IMZ28_RS07030		hypothetical protein && -	12.9555	39.8701	-2.997	0.0188486
IMZ28_RS00960		lysophospholipid acyltransferase family protein && PF01553:Acyltransferase|PF13444:Acetyltransferase (GNAT) domain	54.1123	160.963	-2.97018	0.0155758
IMZ28_RS06165		methyltransferase domain-containing protein && PF03848:Tellurite resistance protein TehB	173.94	515.116	-2.96104	0.00114791
IMZ28_RS01325		tRNA-Phe && -	293.532	868.218	-2.95904	1.81522e-06
IMZ28_RS00590		tRNA-Leu && -	74.4811	219.902	-2.95307	3.5095e-05
IMZ28_RS05935		DUF1924 domain-containing protein && PF09086:Domain of unknown function (DUF1924)	10.6301	30.9062	-2.95199	0.0172309
IMZ28_RS06555		hypothetical protein && PF13435:Cytochrome c554 and c-prime	308.08	909.524	-2.95091	0.00162555
IMZ28_RS10690		hypothetical protein && -	730.649	2156.43	-2.95086	0.00132789
IMZ28_RS06480	cadA	cadmium-translocating P-type ATPase && PF00122:E1-E2 ATPase|PF04945:YHS domain|PF00702:haloacid dehalogenase-like hydrolase	6164.35	18134.8	-2.94195	0.0451478
IMZ28_RS04910		IS110 family transposase && PF01548:Transposase|PF02371:Transposase IS116/IS110/IS902 family	17.0001	50.8502	-2.93782	0.00199814
IMZ28_RS02335		glycosyltransferase && PF00534:Glycosyl transferases group 1	110.468	324.972	-2.92941	0.00351894
IMZ28_RS00930		ankyrin repeat domain-containing protein && PF13857:Ankyrin repeats (many copies)|PF13637:Ankyrin repeats (many copies)	1640.42	4803.13	-2.92832	1.78607e-07
IMZ28_RS05060		hypothetical protein && -	368.523	1074.01	-2.91393	0.00302023
IMZ28_RS05910		GGDEF domain-containing protein && PF07696:7TMR-DISM extracellular 2|PF00990:Diguanylate cyclase, GGDEF domain|PF07695:7TM diverse intracellular signalling	176.45	514.904	-2.91068	2.88071e-07
IMZ28_RS08010		hypothetical protein && -	109.35	317.346	-2.90293	0.00058639
IMZ28_RS07450		hypothetical protein && -	456.349	1321.11	-2.8954	0.0144122
IMZ28_RS09065		Hsp20/alpha crystallin family protein && PF00011:Hsp20/alpha crystallin family	5816.23	16799.9	-2.88849	0.033928
IMZ28_RS10265		helix-turn-helix domain-containing protein && PF07022:Bacteriophage CI repressor helix-turn-helix domain|PF00717:Peptidase S24-like	333.631	963.78	-2.8875	0.00114649
IMZ28_RS00075		response regulator transcription factor && PF00072:Response regulator receiver domain	271.946	786.046	-2.88598	4.18697e-07
IMZ28_RS07035		AAA family ATPase && PF13304:AAA domain, putative AbiEii toxin, Type IV TA system	62.5568	181.446	-2.87932	0.000493973
IMZ28_RS00490		hypothetical protein && -	212.409	611.106	-2.87684	0.00576876
IMZ28_RS06065	amrB	AmmeMemoRadiSam system protein B && PF01875:Memo-like protein	1535.41	4408.13	-2.87119	0.00774099
IMZ28_RS08770		MFS transporter && PF07690:Major Facilitator Superfamily	609.95	1751.12	-2.86972	0.000413574
IMZ28_RS08140		TolC family protein && PF02321:Outer membrane efflux protein	940.439	2688.62	-2.85913	0.0005151
IMZ28_RS07910		response regulator transcription factor && PF00486:Transcriptional regulatory protein, C terminal	1500.1	4288.34	-2.85894	1.84437e-06
IMZ28_RS08435		molecular chaperone TorD family protein && PF02613:Nitrate reductase delta subunit	364.889	1041.87	-2.8531	0.00305907
IMZ28_RS10060		D-2-hydroxyacid dehydrogenase && PF00389:D-isomer specific 2-hydroxyacid dehydrogenase, catalytic domain|PF02826:D-isomer specific 2-hydroxyacid dehydrogenase, NAD binding domain	1174.82	3345.41	-2.84796	0.00456434
IMZ28_RS04920		hypothetical protein && -	222.061	631.474	-2.84633	1.82871e-08
IMZ28_RS04985		cold-shock protein && PF00313:'Cold-shock' DNA-binding domain	4747.19	13496.9	-2.8432	0.000992654
IMZ28_RS01755		hypothetical protein && -	42.405	121.24	-2.83191	0.00058639
IMZ28_RS04245		NAD(P)H-dependent oxidoreductase && PF00881:Nitroreductase family	591.26	1673.37	-2.83135	0.000339372
IMZ28_RS00325		arsenate reductase ArsC && PF01451:Low molecular weight phosphotyrosine protein phosphatase	256.758	725.34	-2.82979	3.78545e-07
IMZ28_RS02245	groES	co-chaperone GroES && PF00166:Chaperonin 10 Kd subunit	2529.63	7151.06	-2.82735	4.73053e-05
IMZ28_RS02255		tRNA-Met && -	163.656	461.246	-2.82649	1.50352e-06
IMZ28_RS05365		hypothetical protein && -	403.356	1137.1	-2.81907	0.00697014
IMZ28_RS03420		methyltransferase && PF05175:Methyltransferase small domain	221.203	621.568	-2.80713	0.000693207
IMZ28_RS02935		hypothetical protein && -	1113.83	3116.61	-2.79775	0.0242384
IMZ28_RS05300		DUF485 domain-containing protein && PF04341:Protein of unknown function, DUF485	205.017	572.317	-2.79701	4.07295e-10
IMZ28_RS03895		O-antigen ligase family protein && PF04932:O-Antigen ligase	118.162	330.527	-2.7863	5.33802e-06
IMZ28_RS10630		Bax inhibitor-1/YccA family protein && PF01027:Inhibitor of apoptosis-promoting Bax1	1304.55	3626.93	-2.78038	3.05212e-07
IMZ28_RS10850		iron-sulfur cluster assembly scaffold protein && PF04324:BFD-like [2Fe-2S] binding domain|PF01106:NifU-like domain|PF01592:NifU-like N terminal domain	7770.98	21536.5	-2.77147	3.38762e-06
IMZ28_RS04590		hypothetical protein && -	303.135	839.225	-2.76576	6.4736e-06
IMZ28_RS10550	rpsT	30S ribosomal protein S20 && PF01649:Ribosomal protein S20	1087.45	3002.98	-2.76028	1.51431e-09
IMZ28_RS05975		hypothetical protein && -	398.648	1100.13	-2.75935	0.0466447
IMZ28_RS02710		Dabb family protein && PF07876:Stress responsive A/B Barrel Domain	157.107	434.012	-2.75906	0.001573
IMZ28_RS01065		hypothetical protein && -	72.2742	200.36	-2.7569	0.00055656
IMZ28_RS10125		hypothetical protein && -	268.876	739.325	-2.75079	1.04935e-05
IMZ28_RS01545		YdcH family protein && PF04325:Protein of unknown function (DUF465)	218.229	601.147	-2.74828	0.000544389
IMZ28_RS03890		glycosyltransferase && PF00535:Glycosyl transferase family 2	138.593	381.873	-2.74699	0.00677581
IMZ28_RS00620		TIGR01458 family HAD-type hydrolase && PF13344:Haloacid dehalogenase-like hydrolase|PF13242:HAD-hyrolase-like	784.764	2154.37	-2.7457	0.0469248
IMZ28_RS05780		response regulator && PF00512:His Kinase A (phospho-acceptor) domain|PF00072:Response regulator receiver domain|PF02518:Histidine kinase-, DNA gyrase B-, and HSP90-like ATPase	249.592	685.602	-2.7426	7.97503e-10
IMZ28_RS04280		hypothetical protein && -	326.686	895.591	-2.74219	9.54328e-05
IMZ28_RS02755		IS110 family transposase && PF01548:Transposase|PF02371:Transposase IS116/IS110/IS902 family	35.1471	97.1253	-2.73663	1.60591e-05
IMZ28_RS09160		KH domain-containing protein && PF13083:KH domain	447.33	1223.38	-2.73563	2.61191e-07
IMZ28_RS08720	tatB	Sec-independent protein translocase subunit TatB && -	141.186	386.613	-2.73072	2.00923e-06
IMZ28_RS04315		trimeric intracellular cation channel family protein && PF03458:UPF0126 domain	25.4971	69.6896	-2.72229	0.000546025
IMZ28_RS02770		response regulator transcription factor && PF00486:Transcriptional regulatory protein, C terminal|PF00072:Response regulator receiver domain	703.767	1913.02	-2.71787	0.00667085
IMZ28_RS07015		tRNA-Ile && -	35.8193	96.1121	-2.71548	0.00886152
IMZ28_RS04630		hypothetical protein && -	716.73	1946.8	-2.71381	2.45741e-07
IMZ28_RS04550		alpha/beta hydrolase && PF12695:Alpha/beta hydrolase family	140.784	380.73	-2.70816	0.0399467
IMZ28_RS05235		2-oxoacid:acceptor oxidoreductase subunit alpha && PF00173:Cytochrome b5-like Heme/Steroid binding domain|PF01855:Pyruvate flavodoxin/ferredoxin oxidoreductase, thiamine diP-bdg|PF01558:Pyruvate ferredoxin/flavodoxin oxidoreductase	1271.31	3442.05	-2.70798	0.0186475
IMZ28_RS05345		endonuclease/exonuclease/phosphatase family protein && PF03372:Endonuclease/Exonuclease/phosphatase family	257.122	697.05	-2.7079	1.9428e-10
IMZ28_RS03080	xseB	exodeoxyribonuclease VII small subunit && PF02609:Exonuclease VII small subunit	253.065	684.556	-2.70377	0.00263588
IMZ28_RS03455		tetratricopeptide repeat protein && PF13414:TPR repeat	440.692	1190.19	-2.70057	9.95181e-07
IMZ28_RS05545		DUF3365 domain-containing protein && PF11845:Protein of unknown function (DUF3365)	555.561	1499.49	-2.69854	5.94732e-06
IMZ28_RS10005		hypothetical protein && -	156.881	424.043	-2.69678	0.00999841
IMZ28_RS09145	rplS	50S ribosomal protein L19 && PF01245:Ribosomal protein L19	1095.22	2953.86	-2.69664	0.00338252
IMZ28_RS04370		23S rRNA (pseudouridine(1915)-N(3))-methyltransferase RlmH && PF02590:Predicted SPOUT methyltransferase	29.7954	80.936	-2.68073	0.0018078
IMZ28_RS03395		hypothetical protein && -	52.1718	139.759	-2.68019	0.00027041
IMZ28_RS09475		c-type cytochrome && PF03150:Di-haem cytochrome c peroxidase|PF00034:Cytochrome c	523.81	1400.85	-2.67489	0.0207577
IMZ28_RS09905		heme-binding domain-containing protein && PF14376:Haem-binding domain	145.447	389.493	-2.66908	3.23009e-07
IMZ28_RS00890		UDP-N-acetylmuramoyl-L-alanyl-D-glutamate--2%2C6-diaminopimelate ligase && PF02875:Mur ligase family, glutamate ligase domain|PF08245:Mur ligase middle domain	4476.92	11920.9	-2.6629	1.82456e-07
IMZ28_RS08660	cmoA	carboxy-S-adenosyl-L-methionine synthase CmoA && PF13847:Methyltransferase domain	135.637	362.217	-2.66265	3.69044e-07
IMZ28_RS09805	ribE	riboflavin synthase && PF00677:Lumazine binding domain	241.373	640.42	-2.65202	0.00927563
IMZ28_RS08825		divergent polysaccharide deacetylase family protein && PF04748:Divergent polysaccharide deacetylase	111.553	295.924	-2.65138	7.28238e-07
IMZ28_RS08710		RNA pyrophosphohydrolase && PF00293:NUDIX domain	285.524	756.97	-2.64626	4.70733e-05
IMZ28_RS03445		phosphomannomutase && -	243.372	642.04	-2.63229	2.85978e-07
IMZ28_RS04355		nodulation protein NfeD && PF01957:NfeD-like C-terminal, partner-binding	2585.02	6767.82	-2.61834	0.00588316
IMZ28_RS09990		tRNA-Pro && -	39.235	102.005	-2.61724	1.30748e-05
IMZ28_RS05800	mog	molybdopterin adenylyltransferase && PF00994:Probable molybdopterin binding domain	685.394	1793.42	-2.61664	0.00213473
IMZ28_RS02415		DUF3108 domain-containing protein && PF11306:Protein of unknown function (DUF3108)	277.987	724.971	-2.60623	0.0111692
IMZ28_RS05110		MBL fold metallo-hydrolase && PF10996:Beta-Casp domain|PF07521:RNA-metabolising metallo-beta-lactamase|PF00753:Metallo-beta-lactamase superfamily	2016.67	5251.09	-2.60404	0.00494863
IMZ28_RS00350		tRNA-His && -	867.403	2256.39	-2.6021	0.0276818
IMZ28_RS07965		hypothetical protein && -	363.986	945.883	-2.59897	5.15658e-05
IMZ28_RS04300		host attachment protein && PF10116:Protein required for attachment to host cells	2394.88	6210.02	-2.59324	0.0399467
IMZ28_RS08520		DUF1882 domain-containing protein && PF08966:Domain of unknown function (DUF1882)	72.4898	188.119	-2.58755	8.77389e-06
IMZ28_RS08635		hypothetical protein && -	126.269	326.961	-2.58504	0.00273675
Novel00008		-	211.711	546.76	-2.58458	0.0471225
IMZ28_RS07545		trypsin-like peptidase domain-containing protein && PF13365:Trypsin-like peptidase domain	79.0208	204.756	-2.58186	0.0223511
IMZ28_RS08870		hypothetical protein && -	589.726	1508.44	-2.55803	0.0442061
IMZ28_RS02185	lpxC	UDP-3-O-acyl-N-acetylglucosamine deacetylase && PF03331:UDP-3-O-acyl N-acetylglycosamine deacetylase	3111.83	7949.5	-2.55461	0.0101091
IMZ28_RS10450		hydrogenase small subunit && PF01058:NADH ubiquinone oxidoreductase, 20 Kd subunit|PF14720:NiFe/NiFeSe hydrogenase small subunit C-terminal	202.402	515.819	-2.55154	0.0081538
IMZ28_RS10255		TraR/DksA C4-type zinc finger protein && PF01258:Prokaryotic dksA/traR C4-type zinc finger	447.837	1141.84	-2.55017	0.0222451
IMZ28_RS05700		CDP-alcohol phosphatidyltransferase family protein && PF01066:CDP-alcohol phosphatidyltransferase	63.4131	160.914	-2.53963	0.000722846
IMZ28_RS04270		leucine-rich repeat domain-containing protein && PF13855:Leucine rich repeat	42.0654	106.692	-2.53839	0.00278282
IMZ28_RS05555		FRG domain-containing protein && PF08867:FRG domain	14.1518	36.7382	-2.53786	0.0360742
IMZ28_RS01605		hypothetical protein && -	101.274	257.414	-2.53031	0.00232379
IMZ28_RS06565		nucleotidyl transferase AbiEii/AbiGii toxin family protein && PF08843:Nucleotidyl transferase AbiEii toxin, Type IV TA system	249.733	630.535	-2.52475	0.0442279
IMZ28_RS09170		sel1 repeat family protein && -	334.864	840.209	-2.50728	4.58018e-05
IMZ28_RS04140	rnpA	ribonuclease P protein component && PF00825:Ribonuclease P	398.798	999.946	-2.50529	0.000221158
IMZ28_RS05805		SDR family NAD(P)-dependent oxidoreductase && PF00106:short chain dehydrogenase	360.489	902.21	-2.50336	0.00324028
IMZ28_RS10000		polyprenyl synthetase family protein && PF00348:Polyprenyl synthetase	390.318	975.734	-2.49723	2.29261e-06
IMZ28_RS04805		hypothetical protein && -	211.554	527.276	-2.49138	0.0016831
IMZ28_RS07240		transglutaminase domain-containing protein && PF01841:Transglutaminase-like superfamily	205.295	511.794	-2.49057	9.19495e-08
IMZ28_RS05705		adenylyltransferase/cytidyltransferase family protein && PF01467:Cytidylyltransferase-like	118.81	295.627	-2.48863	0.0010043
sRNA00046		-	26.6933	66.829	-2.48626	0.028446
IMZ28_RS09130	smpB	SsrA-binding protein SmpB && PF01668:SmpB protein	174.266	432.643	-2.48135	2.13194e-05
IMZ28_RS10635	secG	preprotein translocase subunit SecG && PF03840:Preprotein translocase SecG subunit	573.669	1420.39	-2.47375	1.43477e-08
IMZ28_RS00550		HAMP domain-containing histidine kinase && PF02518:Histidine kinase-, DNA gyrase B-, and HSP90-like ATPase	74.8443	184.161	-2.45673	1.28955e-05
IMZ28_RS01560	rpmB	50S ribosomal protein L28 && PF00830:Ribosomal L28 family	1126.15	2758.55	-2.44829	0.000152206
IMZ28_RS06240	arfB	aminoacyl-tRNA hydrolase && PF00472:RF-1 domain	346.25	844.976	-2.44205	7.82577e-05
IMZ28_RS07375		hypothetical protein && -	44.7485	109.745	-2.43139	0.00637678
IMZ28_RS07760		hypothetical protein && -	175.594	427.351	-2.4282	0.000288582
IMZ28_RS10210		tRNA-Tyr && -	273.389	662.808	-2.4274	0.0298592
IMZ28_RS09710		6-carboxytetrahydropterin synthase && PF01242:6-pyruvoyl tetrahydropterin synthase	749.23	1818.77	-2.42667	2.84648e-06
IMZ28_RS04560	mgtE	magnesium transporter && PF03448:MgtE intracellular N domain|PF01769:Divalent cation transporter	1192.17	2876.92	-2.41369	1.27406e-05
IMZ28_RS10475		hypothetical protein && -	121.158	291.541	-2.41266	2.43879e-07
IMZ28_RS00615		hypothetical protein && -	655.207	1578.67	-2.40896	0.0243253
IMZ28_RS00080		HAMP domain-containing histidine kinase && PF02518:Histidine kinase-, DNA gyrase B-, and HSP90-like ATPase	140.97	339.952	-2.40677	3.646e-08
IMZ28_RS01500		ABC transporter permease && PF02687:FtsX-like permease family	390.484	938.511	-2.40382	0.00709361
IMZ28_RS00065		DUF2892 domain-containing protein && PF11127:Protein of unknown function (DUF2892)	178.794	430.697	-2.40152	1.88644e-05
IMZ28_RS06305	ybeY	rRNA maturation RNase YbeY && PF02130:Uncharacterized protein family UPF0054	110.634	266.61	-2.39803	0.0010485
IMZ28_RS03760		tRNA-Asn && -	67.0325	160.305	-2.39508	0.000449508
IMZ28_RS08585		thioredoxin family protein && PF13899:Thioredoxin-like	90.7924	218.067	-2.39189	0.02583
IMZ28_RS00445		citrate synthase && PF00285:Citrate synthase	957.024	2283.97	-2.38704	0.0409086
IMZ28_RS05245		tRNA-Met && -	35.6034	84.0989	-2.38386	0.0450595
IMZ28_RS10245		DUF309 domain-containing protein && PF03745:Domain of unknown function (DUF309)	231.08	548.465	-2.37628	3.15029e-05
IMZ28_RS10280		MoaD/ThiS family protein && PF02597:ThiS family	345.069	816.666	-2.36579	5.67762e-07
IMZ28_RS01410		hypothetical protein && -	234.052	553.362	-2.36507	0.0131936
IMZ28_RS08510		cation:proton antiporter && PF00999:Sodium/hydrogen exchanger family	1011.09	2376.45	-2.35031	0.0148708
IMZ28_RS03665	lolA	outer-membrane lipoprotein carrier protein LolA && PF03548:Outer membrane lipoprotein carrier protein LolA	534.559	1255.99	-2.34974	0.000865821
IMZ28_RS02475	ccoS	cbb3-type cytochrome oxidase assembly protein CcoS && PF03597:Cytochrome oxidase maturation protein cbb3-type	300.231	706.607	-2.3497	0.00373097
IMZ28_RS07565		hypothetical protein && -	130.95	308.48	-2.34692	1.93196e-05
IMZ28_RS01995	pth	aminoacyl-tRNA hydrolase && PF01195:Peptidyl-tRNA hydrolase	636.218	1492.5	-2.34612	0.0013881
IMZ28_RS09730	tsaA	tRNA (N6-threonylcarbamoyladenosine(37)-N6)-methyltransferase TrmO && PF01980:Uncharacterised protein family UPF0066	409.119	959.942	-2.34507	0.000509385
IMZ28_RS08370		hypothetical protein && -	343.224	801.073	-2.3323	0.00704504
IMZ28_RS06405		lipid-binding SYLF domain-containing protein && PF04366:Las17-binding protein actin regulator	1098.29	2557.77	-2.32878	0.00241835
IMZ28_RS00365		tRNA-Leu && -	104.171	241.233	-2.31681	0.00389402
IMZ28_RS06670		hydrogenase maturation protease && PF01750:Hydrogenase maturation protease	253.35	583.475	-2.30157	1.1932e-05
sRNA00036		-	176.34	403.468	-2.29371	0.000318156
IMZ28_RS09815		hypothetical protein && -	181.754	417.398	-2.29192	0.00148579
IMZ28_RS08755	ruvX	Holliday junction resolvase RuvX && PF03652:Holliday junction resolvase	172.571	394.275	-2.28499	0.00346299
IMZ28_RS08060		heavy metal transporter && -	209.872	478.29	-2.27876	1.27344e-05
IMZ28_RS06030		hypothetical protein && -	86.6887	197.191	-2.27721	0.00333247
IMZ28_RS05295		OprD family outer membrane porin && PF03573:outer membrane porin, OprD family	431.255	980.871	-2.27701	0.0035664
IMZ28_RS04260		hypothetical protein && -	88.8358	202.616	-2.27618	0.00069099
IMZ28_RS08005		hypothetical protein && -	354.799	807.616	-2.27545	1.81443e-06
IMZ28_RS07550		TRAP transporter large permease subunit && PF04290:Tripartite ATP-independent periplasmic transporters, DctQ component|PF06808:Tripartite ATP-independent periplasmic transporter, DctM component	1065.73	2421.24	-2.27187	0.0392892
IMZ28_RS02720		phosphoesterase && PF02272:DHHA1 domain	329.993	747.686	-2.26761	5.81535e-08
IMZ28_RS02730	rpsO	30S ribosomal protein S15 && PF00312:Ribosomal protein S15	736.743	1668.86	-2.26591	7.82577e-05
IMZ28_RS07780	rsmH	16S rRNA (cytosine(1402)-N(4))-methyltransferase RsmH && PF01795:MraW methylase family	244.395	552.697	-2.26082	1.34804e-08
IMZ28_RS04615		response regulator transcription factor && PF00486:Transcriptional regulatory protein, C terminal|PF00072:Response regulator receiver domain	402.661	908.562	-2.25637	0.00708356
IMZ28_RS01815	lgt	prolipoprotein diacylglyceryl transferase && PF01790:Prolipoprotein diacylglyceryl transferase	449.517	1012.35	-2.25012	3.90981e-05
IMZ28_RS04275		HD domain-containing protein && PF01743:Poly A polymerase head domain|PF12627:Probable RNA and SrmB- binding site of polymerase A	836.611	1880.99	-2.24879	0.00283489
IMZ28_RS08920		hypothetical protein && -	81.2951	183.641	-2.246	0.0070911
IMZ28_RS04595		acylphosphatase && PF00708:Acylphosphatase	126.035	283.312	-2.24012	0.00044988
IMZ28_RS08095		ZIP family metal transporter && PF02535:ZIP Zinc transporter	233.123	521.677	-2.23809	0.0020464
IMZ28_RS02715	recR	recombination protein RecR && PF02132:RecR protein	202.453	453.181	-2.23677	0.000637687
IMZ28_RS09285	panC	pantoate--beta-alanine ligase && PF02569:Pantoate-beta-alanine ligase	170.462	379.647	-2.22673	0.00866027
IMZ28_RS00580		tRNA-Ser && -	215.853	479.325	-2.22266	0.00179522
IMZ28_RS02295	hisH	imidazole glycerol phosphate synthase subunit HisH && PF00117:Glutamine amidotransferase class-I	388.835	861.519	-2.21623	2.38688e-06
IMZ28_RS03355		transcriptional regulator && PF09695:Bacterial protein of unknown function (YtfJ_HI0045)	339.886	750.066	-2.20808	0.0240768
IMZ28_RS07840		DUF4149 domain-containing protein && PF13664:Domain of unknown function (DUF4149)	353.103	779.29	-2.20654	0.00127933
IMZ28_RS00925		YbaB/EbfC family nucleoid-associated protein && PF02575:YbaB/EbfC DNA-binding family	1626.82	3588.96	-2.20597	0.0013881
IMZ28_RS10330		glycosyltransferase family 4 protein && PF00534:Glycosyl transferases group 1	113.926	250.975	-2.20132	0.00323711
IMZ28_RS02345		hypothetical protein && -	21.5573	47.973	-2.18874	0.0416123
IMZ28_RS02695		desulfoferrodoxin FeS4 iron-binding domain-containing protein && PF02915:Rubrerythrin|PF06397:Desulfoferrodoxin, N-terminal domain	982.849	2145.84	-2.18406	0.0104687
IMZ28_RS08715	hemW	coproporphyrinogen III oxidase family protein && PF04055:Radical SAM superfamily	82.9718	181.6	-2.18314	0.0148982
IMZ28_RS09060		hypothetical protein && -	2889.69	6306.94	-2.18266	0.0219177
IMZ28_RS06140		tRNA (guanine-N2)-dimethyltransferase && PF00588:SpoU rRNA Methylase family	195.996	425.888	-2.17638	0.00160302
IMZ28_RS10205		tRNA-Gly && -	299.995	648.046	-2.16371	0.00877069
IMZ28_RS01925		hypothetical protein && -	323.308	699.747	-2.1625	9.41103e-08
IMZ28_RS08540		hypothetical protein && -	232.105	501.983	-2.16232	0.0446931
IMZ28_RS08745		SEC-C domain-containing protein && PF02810:SEC-C motif	106.983	231.333	-2.16021	0.00220648
IMZ28_RS07405		efflux RND transporter periplasmic adaptor subunit && -	72.5135	155.497	-2.15745	0.00016488
IMZ28_RS08270	mqnE	aminofutalosine synthase MqnE && PF04055:Radical SAM superfamily	590.795	1271.19	-2.15128	0.000329141
IMZ28_RS02615		hypothetical protein && -	544.399	1171.39	-2.14997	0.00337717
IMZ28_RS01375	exbB	TonB-system energizer ExbB && PF01618:MotA/TolQ/ExbB proton channel family	452.047	971.086	-2.14597	0.000778791
IMZ28_RS03120	obgE	GTPase ObgE && PF01018:GTP1/OBG|PF01926:50S ribosome-binding GTPase	950.154	2037.67	-2.14581	1.96229e-07
IMZ28_RS05470		hypothetical protein && -	92.1959	197.582	-2.14074	0.0326835
IMZ28_RS02790		DUF1538 domain-containing protein && PF07556:Protein of unknown function (DUF1538)	257.745	549.784	-2.13524	5.01041e-05
IMZ28_RS08530		efflux RND transporter permease subunit && PF00873:AcrB/AcrD/AcrF family	456.406	961.242	-2.10601	0.0126689
IMZ28_RS10275		molybdenum cofactor biosynthesis protein MoaE && PF02391:MoaE protein	704.074	1482.13	-2.10425	7.23745e-05
IMZ28_RS06455		CoA ester lyase && PF03328:HpcH/HpaI aldolase/citrate lyase family	108.815	228.603	-2.10292	0.000544389
IMZ28_RS04545		alpha/beta fold hydrolase && PF12146:Serine aminopeptidase, S33|PF01553:Acyltransferase	220.104	461.359	-2.09872	0.00990198
IMZ28_RS01890		hypothetical protein && -	243.405	510.706	-2.09676	0.00130323
IMZ28_RS05270	cas2	CRISPR-associated endonuclease Cas2 && PF09827:CRISPR associated protein Cas2	13.356	28.39	-2.0912	0.0402458
IMZ28_RS06255		hypothetical protein && -	90.6608	190.192	-2.0872	0.00244402
IMZ28_RS10180	secE	preprotein translocase subunit SecE && PF00584:SecE/Sec61-gamma subunits of protein translocation complex	440.081	915.008	-2.08094	0.00439089
IMZ28_RS08355		hypothetical protein && -	279.246	581.835	-2.07997	2.49294e-05
IMZ28_RS00635		site-specific integrase && PF00589:Phage integrase family	46.2713	97.0907	-2.07908	0.0254188
IMZ28_RS08415		malate dehydrogenase && PF00390:Malic enzyme, N-terminal domain|PF03949:Malic enzyme, NAD binding domain	1077.55	2240.04	-2.07791	1.22894e-06
IMZ28_RS04135	rpmH	50S ribosomal protein L34 && PF00468:Ribosomal protein L34	544.963	1131.72	-2.07594	0.00250464
IMZ28_RS00410	hisF	imidazole glycerol phosphate synthase subunit HisF && PF00977:Histidine biosynthesis protein	689.151	1426.3	-2.0687	9.99753e-08
IMZ28_RS06620		hypothetical protein && -	214.112	442.01	-2.06825	6.25612e-05
IMZ28_RS02560	bamD	outer membrane protein assembly factor BamD && PF13525:Outer membrane lipoprotein	1240.4	2562.14	-2.06551	0.000155612
IMZ28_RS02190		hypothetical protein && -	572.174	1179.61	-2.0628	0.00207213
IMZ28_RS09745		DUF134 domain-containing protein && PF02001:Protein of unknown function DUF134	689.778	1418.11	-2.05478	0.0256328
IMZ28_RS05870		5'-nucleotidase && PF06189:5'-nucleotidase	99.6317	204.786	-2.05318	0.0225035
IMZ28_RS02225	ubiE	bifunctional demethylmenaquinone methyltransferase/2-methoxy-6-polyprenyl-1%2C4-benzoquinol methylase UbiE && PF01209:ubiE/COQ5 methyltransferase family	327.739	672.543	-2.04875	0.000362073
IMZ28_RS01945		hypothetical protein && -	266.932	547.379	-2.04752	1.10406e-05
IMZ28_RS01055		tRNA-Glu && -	136.476	278.254	-2.04614	0.0165325
IMZ28_RS02675		HU family DNA-binding protein && PF00216:Bacterial DNA-binding protein	3703.89	7539.14	-2.03524	0.0121527
IMZ28_RS03115		hypothetical protein && -	144.955	295.363	-2.03354	0.0337878
IMZ28_RS07925		hypothetical protein && -	570.885	1161.38	-2.03245	1.64431e-05
IMZ28_RS07225		EAL domain-containing protein && PF00563:EAL domain|PF00990:Diguanylate cyclase, GGDEF domain|PF12974:ABC transporter, phosphonate, periplasmic substrate-binding protein	86.8321	177.14	-2.03214	0.00786454
IMZ28_RS04345		ion transporter && PF00520:Ion transport protein	89.8907	182.436	-2.02298	0.0314943
IMZ28_RS04645		hypothetical protein && -	201.914	407.922	-2.02146	0.0133711
IMZ28_RS09155	rimM	16S rRNA processing protein RimM && PF01782:RimM N-terminal domain	724.838	1460.64	-2.01579	0.00279018
IMZ28_RS07230		cytochrome P460 family protein && PF16694:Cytochrome P460	166.789	336.287	-2.01245	0.00163128
IMZ28_RS04930		hypothetical protein && -	77.3608	156.196	-2.00855	0.00193403
IMZ28_RS00730		AAA family ATPase && PF13173:AAA domain	89.6369	179.271	-2.00134	0.0257871
IMZ28_RS01875		hypothetical protein && PF13385:Concanavalin A-like lectin/glucanases superfamily	1853.47	3707.81	-2.00089	4.58715e-06
IMZ28_RS04195		rhodanese-like domain-containing protein && PF00581:Rhodanese-like domain	191.963	384.601	-2.00061	0.000436306
IMZ28_RS05720		FAD-binding oxidoreductase && PF01266:FAD dependent oxidoreductase	901.083	1801.97	-2.00006	0.0119334
IMZ28_RS06890	sufB	Fe-S cluster assembly protein SufB && PF01458:Uncharacterized protein family (UPF0051)	7643.11	15250.4	-1.99547	0.0122125
IMZ28_RS02200		DUF448 domain-containing protein && PF04296:Protein of unknown function (DUF448)	342.24	683.394	-1.9944	0.00104376
IMZ28_RS01860	argF	ornithine carbamoyltransferase && PF00185:Aspartate/ornithine carbamoyltransferase, Asp/Orn binding domain|PF02729:Aspartate/ornithine carbamoyltransferase, carbamoyl-P binding domain	1489.53	2968.6	-1.99285	0.00183176
IMZ28_RS01070	nfo	deoxyribonuclease IV && PF01261:Xylose isomerase-like TIM barrel	413.669	823.088	-1.98913	6.90808e-05
IMZ28_RS06335	lptA	lipopolysaccharide transport periplasmic protein LptA && PF03968:OstA-like protein	486.01	966.196	-1.9874	0.0323292
IMZ28_RS00995		response regulator transcription factor && PF00072:Response regulator receiver domain|PF00486:Transcriptional regulatory protein, C terminal	501.641	996.67	-1.98577	0.0177227
IMZ28_RS10045	rpsU	30S ribosomal protein S21 && PF01165:Ribosomal protein S21	10572	20881.5	-1.97508	0.000165912
IMZ28_RS07835		DNA-deoxyinosine glycosylase && PF03167:Uracil DNA glycosylase superfamily	261.228	516.056	-1.97456	0.00314946
IMZ28_RS07420	accC	acetyl-CoA carboxylase biotin carboxylase subunit && PF00289:Carbamoyl-phosphate synthase L chain, N-terminal domain|PF02785:Biotin carboxylase C-terminal domain|PF02786:Carbamoyl-phosphate synthase L chain, ATP binding domain	190.937	377.521	-1.97235	0.0225035
IMZ28_RS04395		sulfite exporter TauE/SafE family protein && PF01925:Sulfite exporter TauE/SafE	369.092	726.841	-1.97034	8.12768e-07
IMZ28_RS03105	rplU	50S ribosomal protein L21 && PF00829:Ribosomal prokaryotic L21 protein	2062.79	4056.21	-1.96609	0.000520197
IMZ28_RS07935		5-formyltetrahydrofolate cyclo-ligase && PF01812:5-formyltetrahydrofolate cyclo-ligase family	402.304	791.668	-1.96584	0.0283765
IMZ28_RS07005	pgeF	peptidoglycan editing factor PgeF && PF02578:Multi-copper polyphenol oxidoreductase laccase	233.991	459.78	-1.96504	7.92783e-05
IMZ28_RS03645	mltG	endolytic transglycosylase MltG && PF02618:YceG-like family	374.378	736.555	-1.96491	0.000386771
IMZ28_RS01895		ABC transporter ATP-binding protein && PF00005:ABC transporter|PF00664:ABC transporter transmembrane region	360.954	704.668	-1.95248	0.00717502
IMZ28_RS07235		TDT family transporter && PF03595:Voltage-dependent anion channel	159.537	311.349	-1.94829	0.000166228
IMZ28_RS10285		hypothetical protein && PF02621:Menaquinone biosynthesis	79.2533	154.261	-1.94828	0.000426321
IMZ28_RS06050		histidine phosphatase family protein && PF00300:Histidine phosphatase superfamily (branch 1)	156.787	305.431	-1.94445	0.0182243
IMZ28_RS07950		1-acyl-sn-glycerol-3-phosphate acyltransferase && PF01553:Acyltransferase	185.448	360.978	-1.94196	0.00394183
IMZ28_RS04435	greA	transcription elongation factor GreA && PF01272:Transcription elongation factor, GreA/GreB, C-term|PF03449:Transcription elongation factor, N-terminal	511.424	990.572	-1.93577	0.0118112
IMZ28_RS07245		hypothetical protein && PF02411:MerT mercuric transport protein	22.3028	43.5543	-1.93421	0.0461626
IMZ28_RS04405		hypothetical protein && -	540.805	1046.42	-1.93353	3.94078e-05
IMZ28_RS10910	def	peptide deformylase && PF01327:Polypeptide deformylase	1099.07	2124.07	-1.93227	0.00178387
IMZ28_RS03010		tRNA-Leu && -	228.032	438.924	-1.92841	0.0261263
IMZ28_RS02540		type II secretion system protein && -	222.189	428.214	-1.92764	0.00988881
IMZ28_RS08850		M15 family metallopeptidase && PF13539:D-alanyl-D-alanine carboxypeptidase	334.942	643.928	-1.92285	0.042814
IMZ28_RS01235		twin-arginine translocase TatA/TatE family subunit && PF02416:mttA/Hcf106 family	1117.83	2145.42	-1.91833	0.0310465
IMZ28_RS05025	pyrF	orotidine-5'-phosphate decarboxylase && PF00215:Orotidine 5'-phosphate decarboxylase / HUMPS family	331.683	636.007	-1.91467	0.000135118
IMZ28_RS01650		glycosyltransferase family 2 protein && PF00535:Glycosyl transferase family 2	144.75	278.055	-1.91426	0.00123563
IMZ28_RS01305		four helix bundle protein && PF05635:23S rRNA-intervening sequence protein	104.234	200.386	-1.91284	0.00795133
IMZ28_RS05445	mobB	molybdopterin-guanine dinucleotide biosynthesis protein B && PF03205:Molybdopterin guanine dinucleotide synthesis protein B	413.083	790.682	-1.91205	0.000450097
IMZ28_RS10030		hypothetical protein && -	91.9491	174.334	-1.895	0.0135737
IMZ28_RS01700		plasminogen-binding N-terminal domain-containing protein && PF15436:Plasminogen-binding protein pgbA N-terminal	470.97	890.824	-1.89031	0.00433217
IMZ28_RS06250		hypothetical protein && -	123.168	232.186	-1.88956	0.00117511
IMZ28_RS08800		glycosyl hydrolase && PF00933:Glycosyl hydrolase family 3 N terminal domain	378.44	713.991	-1.88521	7.74447e-05
IMZ28_RS05085		TIGR00730 family Rossman fold protein && PF03641:Possible lysine decarboxylase	326.779	615.377	-1.88386	0.0460169
IMZ28_RS03670		hypothetical protein && -	338.403	637.47	-1.88358	0.0072679
IMZ28_RS04575		hypothetical protein && -	108.519	204.816	-1.88037	0.0199145
IMZ28_RS03440		GatB/YqeY domain-containing protein && PF09424:Yqey-like protein	279.405	525.38	-1.87995	0.0234538
IMZ28_RS08425		hypothetical protein && -	186.041	350.469	-1.87895	0.0464233
IMZ28_RS08845		hypothetical protein && -	35.1471	66.5845	-1.87815	0.0147421
IMZ28_RS01115		rhodanese-like domain-containing protein && PF00581:Rhodanese-like domain	109.955	206.789	-1.87499	0.00130753
IMZ28_RS02165	nadA	quinolinate synthase NadA && PF02445:Quinolinate synthetase A protein	1479.26	2772.3	-1.8739	6.64557e-07
IMZ28_RS10470		L%2CD-transpeptidase family protein && PF03734:L,D-transpeptidase catalytic domain	446.83	832.436	-1.86277	0.0172309
IMZ28_RS02535		type II secretion system protein && -	169.982	317.19	-1.86261	0.0145038
IMZ28_RS06425		MCE family protein && PF02470:MlaD protein	449.122	835.976	-1.86153	0.00623478
IMZ28_RS00455		GGDEF domain-containing protein && PF00990:Diguanylate cyclase, GGDEF domain	597.365	1111.53	-1.85908	0.00323742
IMZ28_RS05920		hypothetical protein && -	295.913	550.084	-1.8584	0.00557097
IMZ28_RS03405		bacteriohemerythrin && PF00990:Diguanylate cyclase, GGDEF domain|PF01814:Hemerythrin HHE cation binding domain|PF08376:Nitrate and nitrite sensing	157.958	293.788	-1.85768	0.0395235
IMZ28_RS04130		hypothetical protein && -	648.693	1205.28	-1.85762	0.00988881
IMZ28_RS01480		PAS domain-containing protein && PF08447:PAS fold	319.58	592.652	-1.85681	0.0331631
IMZ28_RS04785		hypothetical protein && -	3040.01	5606.56	-1.8446	0.0102335
IMZ28_RS07740		DUF2018 family protein && PF09442:Domain of unknown function (DUF2018)	1054.8	1946.52	-1.84432	0.0102543
IMZ28_RS06615		hypothetical protein && -	370.202	682.219	-1.8435	0.000173704
sRNA00020		-	96.2524	176.644	-1.84129	0.0360742
IMZ28_RS02975	nth	endonuclease III && PF00730:HhH-GPD superfamily base excision DNA repair protein	370.324	680.591	-1.83874	0.0375711
IMZ28_RS05480		iron-sulfur cluster assembly scaffold protein && PF01592:NifU-like N terminal domain	277.833	510.022	-1.83769	9.54328e-05
IMZ28_RS04075		TIGR02757 family protein && PF09674:Protein of unknown function (DUF2400)	200.245	367.832	-1.83747	0.00024935
IMZ28_RS04470	serB	phosphoserine phosphatase SerB && PF00702:haloacid dehalogenase-like hydrolase	347.801	638.007	-1.8317	0.010863
IMZ28_RS04625		hypothetical protein && -	49.1693	90.7412	-1.83154	0.0155758
IMZ28_RS08110		DJ-1/PfpI family protein && PF01965:DJ-1/PfpI family	1621.4	2966.36	-1.82978	0.0425348
IMZ28_RS03260		hypothetical protein && -	1119.49	2048.1	-1.82873	1.90454e-05
IMZ28_RS04915		hypothetical protein && -	180.921	330.431	-1.8227	0.00051212
IMZ28_RS02300		lysophospholipid acyltransferase family protein && PF03279:Bacterial lipid A biosynthesis acyltransferase	351.47	640.379	-1.82123	0.00391405
IMZ28_RS06435		paraquat-inducible protein A && PF04403:Paraquat-inducible protein A	67.4459	123.368	-1.81869	0.0185096
IMZ28_RS04710		hypothetical protein && -	242.249	437.117	-1.80364	0.000105928
IMZ28_RS10915	clpP	ATP-dependent Clp endopeptidase proteolytic subunit ClpP && PF00574:Clp protease	1552.08	2797.03	-1.80239	0.0122071
IMZ28_RS07150		TIR domain-containing protein && PF13676:TIR domain	816.984	1472.95	-1.80195	0.000987066
IMZ28_RS05765		hypothetical protein && -	124.587	224.316	-1.79789	0.000929348
IMZ28_RS10650		PAS domain S-box protein && PF08447:PAS fold	319.92	573.659	-1.79604	0.0177437
IMZ28_RS04240		alpha/beta hydrolase && PF00561:alpha/beta hydrolase fold	355.195	636.668	-1.79105	0.00837854
IMZ28_RS05430		hypothetical protein && -	142.726	255.687	-1.79098	0.00490684
IMZ28_RS01665		primosomal protein N' && PF00271:Helicase conserved C-terminal domain|PF00270:DEAD/DEAH box helicase	1591.76	2834.23	-1.7808	0.000676227
IMZ28_RS03470		pyridoxine 5'-phosphate synthase && PF03740:Pyridoxal phosphate biosynthesis protein PdxJ	478.54	849.743	-1.77622	0.000262713
IMZ28_RS07895		ferritin-like domain-containing protein && PF04305:Protein of unknown function (DUF455)	598.244	1057.25	-1.76892	0.00145625
IMZ28_RS09185		YggU family protein && PF02594:Uncharacterised ACR, YggU family COG1872	91.5607	161.373	-1.75598	0.019094
IMZ28_RS02495		DMT family transporter && PF00892:EamA-like transporter family	261.255	457.844	-1.74888	0.00473665
IMZ28_RS02890	trmA	tRNA (uridine(54)-C5)-methyltransferase TrmA && PF05958:tRNA (Uracil-5-)-methyltransferase	358.874	626.285	-1.74655	0.000151389
IMZ28_RS05035		DNA polymerase IV && PF00817:impB/mucB/samB family	101.409	177.298	-1.74559	0.00395638
IMZ28_RS02420		mechanosensitive ion channel family protein && PF00924:Mechanosensitive ion channel	207.841	360.564	-1.73648	0.001065
IMZ28_RS02940		PAS domain-containing protein && PF00989:PAS fold	414.181	717.709	-1.73073	0.0236387
IMZ28_RS00850	rpmJ	50S ribosomal protein L36 && PF00444:Ribosomal protein L36	576.275	996.464	-1.73051	0.0493812
IMZ28_RS05355		hypothetical protein && -	221.908	384.983	-1.73044	0.0165439
IMZ28_RS05730		thiamine-phosphate kinase && PF00586:AIR synthase related protein, N-terminal domain	299.848	518.337	-1.72803	0.0163323
IMZ28_RS07060		hypothetical protein && -	40.6596	70.8387	-1.72647	0.0387067
IMZ28_RS02775		HAMP domain-containing histidine kinase && PF02518:Histidine kinase-, DNA gyrase B-, and HSP90-like ATPase|PF00512:His Kinase A (phospho-acceptor) domain	546.268	940.797	-1.72165	0.00441801
IMZ28_RS07940		redoxin domain-containing protein && PF00578:AhpC/TSA family	118.927	204.369	-1.71341	0.00709361
IMZ28_RS02685		hypothetical protein && -	544.616	928.71	-1.70487	0.00415239
IMZ28_RS04340	nhaA	Na+/H+ antiporter NhaA && PF06965:Na+/H+ antiporter 1	344.001	586.602	-1.7039	0.00134656
IMZ28_RS00975	pstA	phosphate ABC transporter permease PstA && PF00528:Binding-protein-dependent transport system inner membrane component	67.0817	114.74	-1.70203	0.0402458
IMZ28_RS02260		outer membrane beta-barrel protein && PF13505:Outer membrane protein beta-barrel domain	864.925	1471.57	-1.70022	0.000944505
IMZ28_RS09300		ATP-binding cassette domain-containing protein && PF00005:ABC transporter|PF07673:Protein of unknown function (DUF1602)	136.179	230.276	-1.69429	0.00240836
IMZ28_RS04705		flagellar biosynthesis protein FlhF && PF00448:SRP54-type protein, GTPase domain	789.055	1334.85	-1.69208	7.32094e-05
IMZ28_RS06450		hypothetical protein && PF00445:Ribonuclease T2 family	567.392	955.979	-1.68513	0.0292644
IMZ28_RS05560		Fic family protein && PF13412:Winged helix-turn-helix DNA-binding|PF02661:Fic/DOC family	80.0489	135.177	-1.68214	0.00843004
IMZ28_RS07800		peptidylprolyl isomerase && PF13624:SurA N-terminal domain|PF13145:PPIC-type PPIASE domain	1590.98	2664.15	-1.67407	0.000212045
IMZ28_RS03415		arginyltransferase && PF04376:Arginine-tRNA-protein transferase, N terminus|PF04377:Arginine-tRNA-protein transferase, C terminus	264.335	442.533	-1.67378	0.000658876
IMZ28_RS05330		uracil-DNA glycosylase && PF03167:Uracil DNA glycosylase superfamily	399.511	669.494	-1.67377	0.0120714
IMZ28_RS01940		hypothetical protein && -	187.617	313.618	-1.67085	0.00467034
IMZ28_RS01960	bioD	dethiobiotin synthase && PF13500:AAA domain	116.651	194.762	-1.66499	0.0265254
IMZ28_RS04120		hypothetical protein && -	362.23	600.474	-1.65693	0.012984
IMZ28_RS03600		Fis family transcriptional regulator && -	283.086	468.441	-1.65554	0.0340475
IMZ28_RS07385	selA	L-seryl-tRNA(Sec) selenium transferase && PF03841:L-seryl-tRNA selenium transferase	256.042	424.094	-1.65472	0.00905868
IMZ28_RS01350		hypothetical protein && -	785.983	1296.02	-1.64891	0.0376451
IMZ28_RS04670		Rrf2 family transcriptional regulator && PF02082:Transcriptional regulator	649.437	1066.33	-1.64064	0.0119707
IMZ28_RS08915		type III pantothenate kinase && PF03309:Type III pantothenate kinase	306.446	503.081	-1.63904	0.0124203
IMZ28_RS02195	thrB	homoserine kinase && PF08544:GHMP kinases C terminal|PF00288:GHMP kinases N terminal domain	851.943	1380.42	-1.62015	0.000451693
IMZ28_RS01030		hypothetical protein && -	387.758	627.646	-1.61683	0.00739365
IMZ28_RS06415		hypothetical protein && -	1126.33	1820.47	-1.61637	0.0379215
IMZ28_RS02845	hemJ	protoporphyrinogen oxidase HemJ && PF03653:Uncharacterised protein family (UPF0093)	444.937	716.638	-1.61053	0.0165325
IMZ28_RS10220		YaaA family protein && PF03883:Protein of unknown function (DUF328)	188.641	302.573	-1.60486	0.00608916
IMZ28_RS06300	queC	7-cyano-7-deazaguanine synthase QueC && PF06508:Queuosine biosynthesis protein QueC	497.662	796.674	-1.60048	0.000640037
IMZ28_RS09220		histidinol-phosphatase && PF02811:PHP domain	344.26	549.793	-1.5971	0.00347899
IMZ28_RS05380		thioredoxin family protein && PF03190:Protein of unknown function, DUF255	190.067	303.797	-1.59375	0.0491142
IMZ28_RS03225	tolB	Tol-Pal system protein TolB && -	1287.24	2039.87	-1.58439	0.0452639
IMZ28_RS08105		hypothetical protein && -	494.467	782.12	-1.58302	0.0172309
IMZ28_RS09705		hypothetical protein && -	448.941	705.565	-1.57073	0.0411214
IMZ28_RS10035	purN	phosphoribosylglycinamide formyltransferase && PF00551:Formyl transferase	367.606	574.877	-1.56309	0.0155245
IMZ28_RS09625		phytanoyl-CoA dioxygenase family protein && PF05721:Phytanoyl-CoA dioxygenase (PhyH)	866.892	1340.25	-1.54525	0.00389402
IMZ28_RS00010	dnaN	DNA polymerase III subunit beta && PF02768:DNA polymerase III beta subunit, C-terminal domain|PF00712:DNA polymerase III beta subunit, N-terminal domain|PF02767:DNA polymerase III beta subunit, central domain	950.363	1468.34	-1.54411	0.0322299
IMZ28_RS03315	pyrH	UMP kinase && PF00696:Amino acid kinase family	1093.28	1686.73	-1.54225	0.0137808
IMZ28_RS00525		M48 family metallopeptidase && PF01863:Protein of unknown function DUF45	182.87	281.671	-1.53722	0.0243423
IMZ28_RS06085	fabZ	3-hydroxyacyl-ACP dehydratase FabZ && PF07977:FabA-like domain	573.621	874.782	-1.52488	0.0121527
IMZ28_RS09360		hypothetical protein && -	165.167	252.196	-1.52297	0.0385438
IMZ28_RS07865		LysM peptidoglycan-binding domain-containing protein && PF01476:LysM domain	757.786	1138.7	-1.50146	0.0380242
IMZ28_RS00475	rpmI	50S ribosomal protein L35 && PF01632:Ribosomal protein L35	5202.12	7805.65	-1.50037	0.00255124
IMZ28_RS04080		F0F1 ATP synthase subunit A && PF00119:ATP synthase A chain	2509.96	3753.82	-1.49523	0.0167949
IMZ28_RS02705	dnaJ	molecular chaperone DnaJ && PF00226:DnaJ domain|PF00684:DnaJ central domain|PF01556:DnaJ C terminal domain	1023.48	1524.35	-1.48904	0.00645926
IMZ28_RS04600		hypothetical protein && -	154.591	230.387	-1.48645	0.0372763
IMZ28_RS02780		CBS domain-containing protein && PF00571:CBS domain	178.392	262.891	-1.47597	0.0208312
IMZ28_RS10835	folE	GTP cyclohydrolase I FolE && PF01227:GTP cyclohydrolase I	640.797	945.112	-1.47391	0.0195825
IMZ28_RS03320		DNA-directed RNA polymerase subunit omega && PF01192:RNA polymerase Rpb6	450.844	636.78	-1.41221	0.046506
IMZ28_RS02050	rpmF	50S ribosomal protein L32 && PF01783:Ribosomal L32p protein family	679.688	959.736	-1.412	0.0224808
IMZ28_RS10140	rpsL	30S ribosomal protein S12 && PF00164:Ribosomal protein S12/S23	2493.38	3425.38	-1.3736	0.0459298
IMZ28_RS04835		hypothetical protein && PF09967:VWA-like domain (DUF2201)|PF13203:Putative metallopeptidase domain	790.706	1072.43	-1.35601	0.042388

## Sheet: 144 common up
Table S2-5. 144 common differentially up-regulated transcripts in (S0 oxidation vs Na2S2O3 oxidation) vs (S0 reduction vs NaNO3 reduction).
Gene_id	Gene name	Genedescription	S0 oxidation	Na2S2O3 oxidation	FoldChange	padj	S0 reduction	NaNO3 reduction	FoldChange	padj
IMZ28_RS00015		CTP synthase && PF06418:CTP synthase N-terminus|PF00117:Glutamine amidotransferase class-I	2581.31	1772.46	1.45641	0.00831619	3116.35	1174.71	2.65309	1.03184e-07
IMZ28_RS00120		efflux RND transporter periplasmic adaptor subunit && PF16576:Barrel-sandwich domain of CusB or HlyD membrane-fusion	828.293	499.303	1.65841	0.00879798	724.724	187.964	3.85308	1.84437e-06
IMZ28_RS00125		ABC transporter permease && PF02687:FtsX-like permease family|PF12704:MacB-like periplasmic core domain	460.509	321.875	1.43091	0.0484448	471.848	209.889	2.24545	6.24911e-05
IMZ28_RS00160		glycosyltransferase && PF00535:Glycosyl transferase family 2	1310.99	744.246	1.76103	0.00318467	1729.36	121.105	2.86002e+36	2.97931e-45
IMZ28_RS00165		polysaccharide deacetylase family protein && PF01522:Polysaccharide deacetylase	1236.41	645.591	1.91457	0.0303469	1705.43	115.31	14.7819	5.29681e-51
IMZ28_RS00175		glycosyltransferase family 4 protein && PF00534:Glycosyl transferases group 1	3789.52	1736.82	2.18161	0.0053186	7540.73	900.37	8.37462	5.97274e-25
IMZ28_RS00185		nucleotidyltransferase family protein && PF00483:Nucleotidyl transferase	6064.8	1899.24	3.19305	0.00109173	12272.2	350.619	35.0041	1.93565e-18
IMZ28_RS00195		glycosyltransferase family 4 protein && PF13439:Glycosyltransferase Family 4|PF00534:Glycosyl transferases group 1	747.026	278.291	2.68289	0.00167908	2703.89	124.109	21.7909	1.41065e-31
IMZ28_RS00210		polysaccharide biosynthesis/export family protein && PF02563:Polysaccharide biosynthesis/export protein	454.285	289.958	1.56621	0.0270768	713.412	95.5343	7.4634	1.86229e-30
IMZ28_RS00215		hypothetical protein && PF02706:Chain length determinant protein	772.783	480.101	1.60909	0.0364325	1673.08	249.377	6.7087	1.73045e-14
IMZ28_RS00235		response regulator && PF01627:Hpt domain|PF00512:His Kinase A (phospho-acceptor) domain|PF00072:Response regulator receiver domain|PF08447:PAS fold|PF02518:Histidine kinase-, DNA gyrase B-, and HSP90-like ATPase	1925.28	1012.22	1.9019	3.55895e-05	2218.73	616.307	3.60011	3.09551e-07
IMZ28_RS00245		glycosyltransferase family 4 protein && PF13439:Glycosyltransferase Family 4|PF00534:Glycosyl transferases group 1	882.802	434.446	2.03105	0.013717	4751.76	310.924	15.2827	6.64395e-35
IMZ28_RS00250		exopolysaccharide biosynthesis polyprenyl glycosylphosphotransferase && PF02397:Bacterial sugar transferase|PF03808:Glycosyl transferase WecB/TagA/CpsF family	6946.46	2975.01	2.3348	0.0170953	13204.9	1035.52	12.7522	4.43249e-16
IMZ28_RS00545		response regulator transcription factor	215.86	119.652	1.8029	0.0047368	242.544	167.191	1.44998	0.0367847
IMZ28_RS00555		TAXI family TRAP transporter solute-binding subunit && PF16868:NMT1-like family	9064.11	4004.75	2.2634	3.17231e-05	13412.6	1494.59	8.97426	1.32926e-13
IMZ28_RS00560		TRAP transporter permease && PF11874:Domain of unknown function (DUF3394)|PF06808:Tripartite ATP-independent periplasmic transporter, DctM component	12755.2	4800.61	2.657	8.31904e-06	16001.6	1758.72	9.09856	1.38471e-11
IMZ28_RS00565		OprD family outer membrane porin && PF03573:outer membrane porin, OprD family	9109.79	3602.45	2.52886	8.31904e-06	12412.2	1628.59	7.62151	2.18997e-10
IMZ28_RS00570		fumarylacetoacetate hydrolase family protein && PF01557:Fumarylacetoacetate (FAA) hydrolase family	1735.53	578.522	3.00015	1.53011e-06	2279.44	444.824	5.12538	5.95565e-16
IMZ28_RS00695		SAM-dependent DNA methyltransferase && PF12161:HsdM N-terminal domain|PF02384:N-6 DNA Methylase	560.26	328.374	1.70691	0.0107179	639.305	253.409	2.52201	8.72114e-09
IMZ28_RS01090	nagA	N-acetylglucosamine-6-phosphate deacetylase && PF01979:Amidohydrolase family	547.897	378.452	1.44737	0.0469393	495.341	221.644	2.23423	3.52973e-05
IMZ28_RS01100		PTS transporter subunit EIIC && PF00367:phosphotransferase system, EIIB|PF02378:Phosphotransferase system, EIIC	681.799	426.974	1.59658	0.025572	790.275	130.209	6.06464	2.11878e-17
IMZ28_RS01140		NADH-ubiquinone oxidoreductase subunit E family protein && PF16514:putative NADH-ubiquinone oxidoreductase chain E	1463.31	1010.74	1.44769	0.0352981	1486.59	699.929	2.12391	0.0247924
IMZ28_RS01155		NADH-quinone oxidoreductase subunit G && PF10588:NADH-ubiquinone oxidoreductase-G iron-sulfur binding region|PF13510:2Fe-2S iron-sulfur cluster binding domain	9296.81	6278.36	1.48072	0.049086	8602.05	3850.62	2.23392	0.00546275
IMZ28_RS01165	nuoI	NADH-quinone oxidoreductase subunit NuoI && PF12838:4Fe-4S dicluster domain	4809.91	2862.55	1.6802	0.0131803	4291.78	883.779	4.85588	2.95089e-08
IMZ28_RS01170		NADH-quinone oxidoreductase subunit J && PF00499:NADH-ubiquinone/plastoquinone oxidoreductase chain 6	2949.4	1840.55	1.60233	0.0147284	2622.42	599.339	4.37517	2.85143e-08
IMZ28_RS01175	nuoK	NADH-quinone oxidoreductase subunit NuoK && PF00420:NADH-ubiquinone/plastoquinone oxidoreductase chain 4L	1368.04	853.529	1.60249	0.0102457	1057.51	340.075	3.10961	0.000116811
IMZ28_RS01180	nuoL	NADH-quinone oxidoreductase subunit L && PF00662:NADH-Ubiquinone oxidoreductase (complex I), chain 5 N-terminus|PF00361:Proton-conducting membrane transporter	11175.2	6644.85	1.68173	0.02144	9237.48	1740.99	5.30578	3.58027e-12
IMZ28_RS01190	nuoN	NADH-quinone oxidoreductase subunit NuoN && PF00361:Proton-conducting membrane transporter	8015.56	5053.47	1.58612	0.0383483	7250.34	1136.71	6.37796	2.17037e-16
IMZ28_RS01420		TonB-dependent receptor	1539.22	707.421	2.17608	0.0224016	4840.45	1699.44	2.84859	0.036057
IMZ28_RS01580		EI24 domain-containing protein && PF07264:Etoposide-induced protein 2.4 (EI24)	701.781	450	1.55932	0.00960105	694.155	184.368	3.76318	2.8841e-10
IMZ28_RS01585		gamma carbonic anhydrase family protein && PF00132:Bacterial transferase hexapeptide (six repeats)	611.628	386.21	1.58279	0.0245176	497.038	137.147	3.62022	7.17003e-14
IMZ28_RS01610		type II secretion system protein && PF07963:Prokaryotic N-terminal methylation motif	74262.5	34969	2.12368	0.00203506	60182.9	21097.9	2.85253	0.0036077
IMZ28_RS01695		FAD-binding protein && PF02913:FAD linked oxidases, C-terminal domain|PF01565:FAD binding domain	1522.32	1039.16	1.46495	0.0496049	1668.95	706.363	2.3625	1.60689e-05
IMZ28_RS01745		carbon-nitrogen hydrolase && PF00795:Carbon-nitrogen hydrolase	570.508	263.278	2.16685	4.79439e-06	645.629	111.879	5.76969	1.86091e-14
IMZ28_RS01810		CoA activase && PF01869:BadF/BadG/BcrA/BcrD ATPase family|PF09989:CoA enzyme activase uncharacterised domain (DUF2229)	881.18	594.467	1.48217	0.0437427	893.406	202.504	4.40878	2.90578e-13
IMZ28_RS02090	mfd	transcription-repair coupling factor && PF00271:Helicase conserved C-terminal domain|PF03461:TRCF domain|PF02559:CarD-like/TRCF domain|PF00270:DEAD/DEAH box helicase	665.128	463.966	1.4338	0.0437427	873.546	434.458	2.01114	0.000515333
IMZ28_RS02110		VWA domain-containing protein && PF13519:von Willebrand factor type A domain	1050.24	621.586	1.68916	0.00854327	1006.81	404.545	2.48873	0.000215258
IMZ28_RS02115		VWA domain-containing protein && PF13519:von Willebrand factor type A domain	1239.03	752.817	1.64552	0.0126583	1097.21	340.569	3.2212	2.08245e-06
IMZ28_RS02125		BatD family protein && PF13584:Oxygen tolerance	1563.44	854.741	1.82923	0.000307512	1425.93	348.806	4.08857	4.31084e-18
IMZ28_RS02375	cysN	sulfate adenylyltransferase subunit CysN && PF00009:Elongation factor Tu GTP binding domain	1740.89	1036.1	1.68012	0.0143242	1783.04	442.837	4.02514	5.0364e-10
IMZ28_RS02485		phosphomannomutase/phosphoglucomutase && PF02879:Phosphoglucomutase/phosphomannomutase, alpha/beta/alpha domain II|PF02880:Phosphoglucomutase/phosphomannomutase, alpha/beta/alpha domain III|PF02878:Phosphoglucomutase/phosphomannomutase, alpha/beta/alpha domain I|PF00408:Phosphoglucomutase/phosphomannomutase, C-terminal domain	1621.61	1064.05	1.52391	0.0245176	1534.27	627.093	2.44588	1.71078e-06
IMZ28_RS02490		glucose-6-phosphate isomerase && PF00342:Phosphoglucose isomerase	668.919	423.452	1.57996	0.00330054	629.149	179.647	3.50396	2.02872e-16
IMZ28_RS02530	raiA	ribosome-associated translation inhibitor RaiA && PF02482:Sigma 54 modulation protein / S30EA ribosomal protein|PF16321:Sigma 54 modulation/S30EA ribosomal protein C terminus	16743	9188.22	1.8222	3.36285e-05	11650.1	3184.78	3.65784	5.54404e-09
IMZ28_RS02575		nitrate- and nitrite sensing domain-containing protein && PF08376:Nitrate and nitrite sensing|PF00072:Response regulator receiver domain|PF02518:Histidine kinase-, DNA gyrase B-, and HSP90-like ATPase|PF00512:His Kinase A (phospho-acceptor) domain	4863.92	3315.75	1.46694	0.0283987	6111.29	1449.79	4.21532	1.51431e-09
IMZ28_RS02580		Hpt domain-containing protein && -	2669.93	1834.14	1.45577	0.0349045	3546	1529.8	2.3179	0.0201839
IMZ28_RS02590	uvrC	excinuclease ABC subunit UvrC && PF01541:GIY-YIG catalytic domain|PF08459:UvrC Helix-hairpin-helix N-terminal	388.908	249.472	1.55924	0.0150326	459.155	116.126	3.95011	2.44754e-13
IMZ28_RS02660		polyribonucleotide nucleotidyltransferase && PF03725:3' exoribonuclease family, domain 2|PF00575:S1 RNA binding domain|PF03726:Polyribonucleotide nucleotidyltransferase, RNA binding domain|PF01138:3' exoribonuclease family, domain 1|PF00013:KH domain	2942.42	1957.12	1.50344	0.0390988	3418.08	1356.09	2.52014	8.86847e-11
IMZ28_RS02880	coaBC	bifunctional phosphopantothenoylcysteine decarboxylase/phosphopantothenate--cysteine ligase CoaBC && PF04127:DNA / pantothenate metabolism flavoprotein|PF02441:Flavoprotein	1429.63	963.075	1.48425	0.037266	1496.61	461.95	3.2389	1.56135e-07
IMZ28_RS02950	trpB	tryptophan synthase subunit beta && PF00291:Pyridoxal-phosphate dependent enzyme	2018.69	1432.99	1.40865	0.046249	2203.48	1251.33	1.7606	0.0112045
IMZ28_RS02980		peptidylprolyl isomerase && PF00639:PPIC-type PPIASE domain	3960.34	2559.15	1.54763	0.0126514	5157.49	3234.05	1.59475	0.0491215
IMZ28_RS02985		hypothetical protein && -	4358.15	2873.32	1.51673	0.00430192	4780.04	2252.11	2.1225	0.000253397
IMZ28_RS02990	fbaA	class II fructose-bisphosphate aldolase && PF01116:Fructose-bisphosphate aldolase class-II	4236.03	2665.92	1.58883	0.00867638	4567.95	1454.58	3.14028	2.76535e-11
IMZ28_RS03090		HesA/MoeB/ThiF family protein && PF00899:ThiF family	682.038	427.79	1.59418	0.00452451	771.629	369.659	2.08678	0.001164
IMZ28_RS03100		RidA family protein && PF01042:Endoribonuclease L-PSP	1032.77	641.299	1.61092	0.00504142	1321.99	694.952	1.90259	0.0182243
IMZ28_RS03530	mshL	pilus (MSHA type) biogenesis protein MshL && PF00263:Bacterial type II and III secretion system protein|PF07655:Secretin N-terminal domain	3821.94	2255.38	1.69457	0.00300687	3172.14	1036.95	3.05943	5.45941e-09
IMZ28_RS03550		type II secretion system F family protein	1265.06	934.793	1.35328	0.0229556	1172.5	460.004	2.55012	9.81944e-07
IMZ28_RS03620		nitrate reductase && PF01568:Molydopterin dinucleotide binding domain|PF00384:Molybdopterin oxidoreductase|PF04879:Molybdopterin oxidoreductase Fe4S4 domain	5444.42	3102.79	1.75456	0.00880046	4494.85	2103.62	2.13648	0.0235954
IMZ28_RS03740	hemE	uroporphyrinogen decarboxylase && PF01208:Uroporphyrinogen decarboxylase (URO-D)	3141.37	2061.21	1.52391	0.0440491	3119.46	1173.09	2.65874	3.22242e-05
IMZ28_RS03795	gmd	GDP-mannose 4%2C6-dehydratase && PF16363:GDP-mannose 4,6 dehydratase	849.471	522.739	1.62475	0.026043	901.622	143.935	6.25947	9.78386e-27
IMZ28_RS03810	wecB	UDP-N-acetylglucosamine 2-epimerase (non-hydrolyzing) && PF02350:UDP-N-acetylglucosamine 2-epimerase	199.585	118.287	1.68841	0.0455224	248.373	124.372	1.99864	0.00348821
IMZ28_RS03820	pseB	UDP-N-acetylglucosamine 4%2C6-dehydratase (inverting) && PF02719:Polysaccharide biosynthesis protein	680.09	475.989	1.42841	0.0301586	795.477	518.245	1.53555	0.0226477
IMZ28_RS03825	pseC	UDP-4-amino-4%2C6-dideoxy-N-acetyl-beta-L-altrosamine transaminase && PF01041:DegT/DnrJ/EryC1/StrS aminotransferase family	525.469	369.09	1.42378	0.0322059	610.088	299.789	2.03655	0.00318467
IMZ28_RS03910		N-acetyl sugar amidotransferase && -	498.299	326.536	1.52682	0.0392935	620.172	287.526	2.15612	1.1374e-06
IMZ28_RS03925		bi-domain-containing oxidoreductase && PF00107:Zinc-binding dehydrogenase|PF01408:Oxidoreductase family, NAD-binding Rossmann fold	1591.37	851.394	1.86893	0.00148121	1659.57	415.571	3.99279	1.08341e-13
IMZ28_RS03980		aminotransferase class I/II-fold pyridoxal phosphate-dependent enzyme && PF00155:Aminotransferase class I and II	368.156	186.171	1.97692	0.00575615	405.878	52.8274	7.67098	6.34487e-09
IMZ28_RS03985		phosphotransferase && PF01636:Phosphotransferase enzyme family	304.876	168.53	1.80913	0.0364325	352.164	65.2665	5.38763	5.39665e-11
IMZ28_RS03995		cobyric acid synthase && PF01656:CobQ/CobB/MinD/ParA nucleotide binding domain|PF07685:CobB/CobQ-like glutamine amidotransferase domain	586.37	352.312	1.66389	0.02669	614.766	108.996	5.63465	1.71924e-08
IMZ28_RS04030		TonB-dependent receptor && PF07715:TonB-dependent Receptor Plug Domain|PF00593:TonB dependent receptor	3737.65	2243.62	1.66595	0.0150526	4313.49	1344.65	3.20742	4.74511e-10
IMZ28_RS04415	ccsA	cytochrome c biogenesis protein CcsA && PF05140:ResB-like family|PF01578:Cytochrome C assembly protein	7003.5	4183.79	1.67389	0.00543295	7224.16	3591.25	2.0115	0.00320183
IMZ28_RS04475		4Fe-4S binding protein && PF12801:4Fe-4S binding domain	944.503	137.57	6.86596	5.01461e-11	1033.79	56.2245	18.3821	5.51194e-14
IMZ28_RS04510		biotin/lipoyl-binding protein && PF00364:Biotin-requiring enzyme|PF02436:Conserved carboxylase domain|PF00682:HMGL-like	8013.48	5217.73	1.53584	0.0327745	10554.2	2397.67	4.40187	1.36026e-10
IMZ28_RS04520	pckA	phosphoenolpyruvate carboxykinase (ATP) && PF01293:Phosphoenolpyruvate carboxykinase	8362.97	5055.47	1.65425	0.00927871	11664.6	3586.23	3.25263	0.000116654
IMZ28_RS05170	crcB	fluoride efflux transporter CrcB && PF02537:CrcB-like protein, Camphor Resistance (CrcB)	307.137	201.226	1.52636	0.0329365	300.655	126.339	2.37646	4.90866e-06
IMZ28_RS05495		PDC sensor domain-containing protein && PF02743:Cache domain	1218.75	825.989	1.47523	0.0279059	1155.95	542.356	2.13085	0.00149899
IMZ28_RS05750		CoB--CoM heterodisulfide reductase iron-sulfur subunit B family protein && PF02754:Cysteine-rich domain	4903.96	3221.73	1.52205	0.0469393	4798.4	1438.25	3.33607	3.43099e-05
IMZ28_RS06185		TRAP transporter substrate-binding protein && PF03480:Bacterial extracellular solute-binding protein, family 7	1335.43	865.651	1.54261	0.0039128	1519.51	928.348	1.63609	0.00662064
IMZ28_RS06515		TolC family protein && PF02321:Outer membrane efflux protein	506.177	203.426	2.48903	3.88041e-06	547.018	124.104	4.40448	0.000989459
IMZ28_RS06520		efflux RND transporter periplasmic adaptor subunit && PF16576:Barrel-sandwich domain of CusB or HlyD membrane-fusion	879.882	310.378	2.83389	1.34268e-09	790.329	94.8321	8.33048	3.18613e-07
IMZ28_RS06525		efflux RND transporter permease subunit && PF00873:AcrB/AcrD/AcrF family	2341.5	952.959	2.45677	1.7185e-07	1690.7	175.397	9.63704	1.70694e-09
IMZ28_RS06635		nickel-dependent hydrogenase large subunit && PF00374:Nickel-dependent hydrogenase	621.422	410.342	1.51399	0.0472686	524.759	77.3292	6.77812	6.35071e-16
IMZ28_RS06720		4Fe-4S dicluster domain-containing protein && PF01058:NADH ubiquinone oxidoreductase, 20 Kd subunit|PF13187:4Fe-4S dicluster domain	760.939	421.64	1.80488	0.00104759	1496.01	261.737	5.71677	7.213e-14
IMZ28_RS06725		NADH-quinone oxidoreductase subunit C && PF00329:Respiratory-chain NADH dehydrogenase, 30 Kd subunit	418.529	220.513	1.89842	0.00061998	765.195	211.323	3.62203	3.68873e-07
IMZ28_RS06730		nickel-dependent hydrogenase large subunit && PF00346:Respiratory-chain NADH dehydrogenase, 49 Kd subunit|PF00374:Nickel-dependent hydrogenase	1188.66	589.171	2.01792	3.15753e-05	2017.8	490.657	4.11285	5.59138e-06
IMZ28_RS06735		4Fe-4S dicluster domain-containing protein && PF13247:4Fe-4S dicluster domain	537.951	278.156	1.93459	0.000142914	881.317	195.06	4.51937	1.14112e-09
IMZ28_RS06740	hypA	hydrogenase maturation nickel metallochaperone HypA && PF01155:Hydrogenase/urease nickel incorporation, metallochaperone, hypA	234.829	134.006	1.75386	0.0422721	413.448	139.249	2.97169	8.01444e-05
IMZ28_RS06745		glutamate synthase subunit beta && PF07992:Pyridine nucleotide-disulphide oxidoreductase|PF14691:Dihydroprymidine dehydrogenase domain II, 4Fe-4S cluster	1054.37	672.311	1.56877	0.0379178	2406.7	622.701	3.86538	9.92507e-07
IMZ28_RS06910		DUF59 domain-containing protein && PF01883:Domain of unknown function DUF59	2550.28	1544.02	1.65173	0.00160931	2192.53	628.445	3.48838	0.00192151
IMZ28_RS07105		ThiF family adenylyltransferase && PF00899:ThiF family	1349.19	697.014	1.93579	0.00109173	1377.67	429.987	3.20321	3.89522e-09
IMZ28_RS07130		hypothetical protein && -	310.772	130.599	2.3815	0.00545123	315.108	62.7215	5.02567	0.00042282
IMZ28_RS07135		hypothetical protein && -	1113.02	487.864	2.28189	0.000240421	1083.91	296.913	3.65051	0.000184318
IMZ28_RS07140		hypothetical protein && -	570.922	287.238	1.98811	0.00504982	675.208	162.875	4.14463	0.000130971
IMZ28_RS07155		AAA family ATPase && PF10431:C-terminal, D2-small domain, of ClpB protein|PF07724:AAA domain (Cdc48 subfamily)	353.586	191.249	1.84985	0.00816524	430.443	271.683	1.58392	0.0160219
IMZ28_RS07270		molybdopterin-dependent oxidoreductase && PF01568:Molydopterin dinucleotide binding domain|PF04879:Molybdopterin oxidoreductase Fe4S4 domain|PF00384:Molybdopterin oxidoreductase	668.371	422.086	1.58302	0.0193793	540.319	332.71	1.62242	0.0178027
IMZ28_RS07310		OprD family outer membrane porin && PF03573:outer membrane porin, OprD family	323.084	139.077	2.32095	5.39652e-05	338.424	64.3751	5.25554	3.59891e-06
IMZ28_RS07315		molybdopterin molybdotransferase MoeA && PF03453:MoeA N-terminal region (domain I and II)|PF03454:MoeA C-terminal region (domain IV)|PF00994:Probable molybdopterin binding domain	603.962	275.015	2.19503	0.000142914	389.719	79.7929	4.87928	1.78607e-07
IMZ28_RS07320		winged helix-turn-helix domain-containing protein && PF00126:Bacterial regulatory helix-turn-helix protein, lysR family	300.494	134.886	2.22616	0.00034156	217.593	73.2242	2.96628	0.00109173
IMZ28_RS07330		cytochrome b/b6 domain-containing protein && PF00033:Cytochrome b/b6/petB	639.551	363.688	1.75737	0.0329365	312.931	144.025	2.16962	5.77234e-06
IMZ28_RS07335	fdh3B	4Fe-4S dicluster domain-containing protein && PF13247:4Fe-4S dicluster domain	1811.96	715.32	2.53245	1.19013e-05	785.962	169.979	4.6211	9.99753e-08
IMZ28_RS07340		formate dehydrogenase subunit alpha && PF01568:Molydopterin dinucleotide binding domain|PF00384:Molybdopterin oxidoreductase|PF04879:Molybdopterin oxidoreductase Fe4S4 domain	8129.11	3921.57	2.0728	0.000346398	4214.34	1059.44	3.97736	2.3412e-07
IMZ28_RS07350		molecular chaperone TorD family protein && PF02613:Nitrate reductase delta subunit	170.981	90.9977	1.87892	0.0175678	159.832	81.505	1.95784	0.00207902
IMZ28_RS07390		OprD family outer membrane porin && PF03573:outer membrane porin, OprD family	854.749	482.955	1.76927	0.00144388	818.542	307.285	2.66217	0.00240836
IMZ28_RS07475		glycoside hydrolase family 9 protein && PF02927:N-terminal ig-like domain of cellulase|PF00759:Glycosyl hydrolase family 9	2850.53	1835.84	1.55251	0.0388436	2094.74	713.448	2.93567	7.4547e-05
IMZ28_RS07995		5-oxoprolinase subunit PxpA && PF03746:LamB/YcsF family	655.377	454.096	1.44289	0.0293763	635.863	288.826	2.20161	0.00141406
IMZ28_RS08285		peptidoglycan-binding protein && PF01471:Putative peptidoglycan binding domain	2784.14	1917.89	1.4516	0.00837703	2911.57	1807.23	1.61074	0.0276308
IMZ28_RS08310	thiD	bifunctional hydroxymethylpyrimidine kinase/phosphomethylpyrimidine kinase && PF08543:Phosphomethylpyrimidine kinase	651.432	438.662	1.48544	0.0270768	917.349	194.139	4.72411	1.85196e-12
IMZ28_RS08315	thiE	thiamine phosphate synthase && PF02581:Thiamine monophosphate synthase/TENI	983.775	627.745	1.56651	0.0279059	1081.39	266.083	4.06353	9.8423e-10
IMZ28_RS08320		thiazole synthase && PF05690:Thiazole biosynthesis protein ThiG	2019.95	1179	1.71304	0.00291902	2448.68	481.329	5.08644	3.59455e-10
IMZ28_RS08360	metE	5-methyltetrahydropteroyltriglutamate--homocysteine S-methyltransferase && PF01717:Cobalamin-independent synthase, Catalytic domain|PF08267:Cobalamin-independent synthase, N-terminal domain	3542.53	1343.09	2.63782	2.2423e-08	4167.34	651.161	6.39917	2.38572e-11
IMZ28_RS08650		HAMP domain-containing histidine kinase && PF02518:Histidine kinase-, DNA gyrase B-, and HSP90-like ATPase|PF00672:HAMP domain	840.045	541.242	1.55165	0.0255511	913.506	234.457	3.89641	4.39779e-06
IMZ28_RS08880		tandem-95 repeat protein && PF16184:Cadherin-like|PF00082:Subtilase family	8602.06	5692.32	1.5111	0.0277136	7421.5	4202.67	1.76576	0.0108212
IMZ28_RS09020		carbonic anhydrase && PF00484:Carbonic anhydrase	526.526	363.979	1.44675	0.0445765	518.223	176.673	2.93203	0.000896116
IMZ28_RS09025	cysK	cysteine synthase A && PF00291:Pyridoxal-phosphate dependent enzyme	870.685	492.716	1.76755	0.00217519	799.952	267.087	2.99362	0.000106872
IMZ28_RS09030		aminotransferase class IV && PF01063:Amino-transferase class IV	105.593	61.9998	1.7037	0.0440832	106.347	43.0397	2.46311	8.98418e-05
IMZ28_RS09225	glnA	type I glutamate--ammonia ligase && PF03951:Glutamine synthetase, beta-Grasp domain|PF00120:Glutamine synthetase, catalytic domain	11832.2	7236.55	1.63505	0.0102457	13255.2	5320.99	2.49104	1.64431e-05
IMZ28_RS09240		PBP1A family penicillin-binding protein && PF00905:Penicillin binding protein transpeptidase domain|PF00912:Transglycosylase	1454.85	1066.62	1.36393	0.0376243	1507.39	854.333	1.76414	0.00302323
IMZ28_RS09390		nitrate reductase cytochrome c-type subunit && PF03892:Nitrate reductase cytochrome c-type subunit (NapB)	17204.7	11028.4	1.56003	0.00753686	18348.4	5439.6	3.37303	0.00139045
IMZ28_RS09395		cytochrome C && -	4152.61	2499.64	1.66139	0.00544171	5010.38	1148.73	4.36132	0.000675995
IMZ28_RS09405	napG	ferredoxin-type protein NapG && PF12838:4Fe-4S dicluster domain	15514.8	8123.93	1.90972	0.000240421	14784.1	3270.57	4.52022	0.00047028
IMZ28_RS09410	napA	nitrate reductase catalytic subunit NapA && PF01568:Molydopterin dinucleotide binding domain|PF00384:Molybdopterin oxidoreductase|PF04879:Molybdopterin oxidoreductase Fe4S4 domain	51772.5	31230.3	1.65776	0.00573498	58225.5	14661.8	3.97122	0.000324926
IMZ28_RS09780		cytochrome c1 && PF00034:Cytochrome c	4899.57	3398.28	1.44185	0.0443921	6269.29	1297.02	4.83367	2.44047e-10
IMZ28_RS09785		cytochrome bc complex cytochrome b subunit && PF00032:Cytochrome b(C-terminal)/b6/petD|PF13631:Cytochrome b(N-terminal)/b6/petB	6225.97	4237.42	1.46932	0.0455224	7984.12	2157.28	3.70092	3.39774e-08
IMZ28_RS09825		pyruvate ferredoxin oxidoreductase && PF02775:Thiamine pyrophosphate enzyme, C-terminal TPP binding domain	13616.6	8325.65	1.63548	0.00144263	14712.4	5411.29	2.71881	0.00143212
IMZ28_RS09830		2-oxoacid:ferredoxin oxidoreductase subunit alpha && PF02780:Transketolase, C-terminal domain|PF01855:Pyruvate flavodoxin/ferredoxin oxidoreductase, thiamine diP-bdg	21363.9	12426.1	1.71925	0.003653	20328.9	9171.88	2.21642	0.0151489
IMZ28_RS09850		ABC transporter ATP-binding protein && PF07673:Protein of unknown function (DUF1602)|PF00005:ABC transporter	603.087	380.471	1.5852	0.0210184	631.884	227.278	2.77872	1.09413e-05
IMZ28_RS09855		ABC transporter permease && PF00528:Binding-protein-dependent transport system inner membrane component	408.229	250.705	1.62862	0.0131803	456.171	131.594	3.46611	3.29606e-07
IMZ28_RS09870		FAD-dependent oxidoreductase && PF07992:Pyridine nucleotide-disulphide oxidoreductase	14581.6	8658.24	1.68409	0.000676698	12701.5	6146.43	2.0664	0.000173704
IMZ28_RS09920		DUF4006 family protein && PF13179:Family of unknown function (DUF4006)	2205.71	1420.34	1.55283	0.0191801	2498.74	529.671	4.7175	3.75772e-14
IMZ28_RS09930		cytochrome c oxidase%2C cbb3-type%2C CcoQ subunit && PF05545:Cbb3-type cytochrome oxidase component FixQ	1039.31	595.154	1.7456	0.0229167	1055.43	203.909	5.17636	1.35552e-12
IMZ28_RS10065		FAD-dependent oxidoreductase && PF02910:Fumarate reductase flavoprotein C-term|PF00890:FAD binding domain	2890.5	1808.87	1.59772	0.0327745	2102.17	739.588	2.84144	1.1374e-06
IMZ28_RS10095		alpha/beta hydrolase && PF06821:Serine hydrolase	362.887	222.837	1.62897	0.0165935	380.428	57.2741	6.63464	5.95401e-09
IMZ28_RS10305		aminotransferase class V-fold PLP-dependent enzyme && PF01041:DegT/DnrJ/EryC1/StrS aminotransferase family	576.904	385.536	1.49618	0.0191801	600.089	275.908	2.17416	1.22169e-06
IMZ28_RS10310		peptide-binding protein && PF02516:Oligosaccharyl transferase STT3 subunit	1627.64	1074.27	1.51495	0.0458894	1622.63	709.695	2.28584	1.49408e-08
IMZ28_RS10345		DegT/DnrJ/EryC1/StrS family aminotransferase && PF01041:DegT/DnrJ/EryC1/StrS aminotransferase family	354.04	212.941	1.66246	0.00639356	412.602	181.029	2.27934	3.78169e-06
IMZ28_RS10355		Gfo/Idh/MocA family oxidoreductase && PF02894:Oxidoreductase family, C-terminal alpha/beta domain|PF01408:Oxidoreductase family, NAD-binding Rossmann fold	693.835	435.744	1.59198	0.00291902	692.31	310.189	2.23143	0.000479858
IMZ28_RS10425		transporter && -	770.258	387.164	1.99018	7.3815e-05	989.316	496.189	1.99384	0.0444705
IMZ28_RS10600		DUF3373 family protein && PF11853:Protein of unknown function (DUF3373)	52260.1	36702.8	1.42387	0.00998042	64468.6	26771.7	2.40808	3.51203e-06
IMZ28_RS10715		TIGR04219 family outer membrane beta-barrel protein && -	603.697	360.177	1.67661	0.00635867	759.486	210.247	3.60974	2.85658e-12
IMZ28_RS10775		VWA domain-containing protein && PF13519:von Willebrand factor type A domain	704.853	485.12	1.45271	0.0327745	860.404	302.751	2.84098	3.64417e-07

## Sheet: 155 common down
Table S2-6. 155 common differentially down-regulted transcripts in (S0 oxidation vs Na2S2O3 oxidation) vs (S0 reduction vs NaNO3 reduction).
Gene ID	Gene name	Gene description	S0 oxidation	Na2S2O3 oxidation	FoldChange	padj	S0 reduction	NaNO3 reduction	FoldChange	padj
IMZ28_RS00035		cytochrome b/b6 domain-containing protein && PF00033:Cytochrome b/b6/petB|PF09626:Dihaem cytochrome c	63.1735	160.154	-2.53819	0.00034156	125.846	446.137	-3.53891	0.000697023
IMZ28_RS00045		hypothetical protein && -	35.8151	77.6396	-2.15713	0.0159988	76.3926	253.389	-3.30832	0.00109173
IMZ28_RS00350		tRNA-His && -	276.443	1595.33	-5.77023	0.00654952	867.403	2256.39	-2.6021	0.0276818
IMZ28_RS00365		tRNA-Leu && -	18.3873	84.0526	-4.57147	0.00167908	104.171	241.233	-2.31681	0.00389402
IMZ28_RS00455		GGDEF domain-containing protein && PF00990:Diguanylate cyclase, GGDEF domain	596.805	1086.18	-1.81977	0.0143062	597.365	1111.53	-1.85908	0.00323742
IMZ28_RS00505		hypothetical protein && -	2020.33	4401.29	-2.17856	0.0211693	596.185	4481.87	-7.51815	0.000171859
IMZ28_RS00580		tRNA-Ser && -	62.7762	204.723	-3.26025	0.000429637	215.853	479.325	-2.22266	0.00179522
IMZ28_RS00590		tRNA-Leu && -	25.8352	129.523	-5.01365	0.00144645	74.4811	219.902	-2.95307	3.5095e-05
IMZ28_RS00660		- && PF01527:Transposase|PF00665:Integrase core domain	28.2412	75.3972	-2.65635	0.0446607	46.3204	169.325	-3.63398	0.000471398
IMZ28_RS00720		tRNA-Ser && -	9.91294	34.0635	-3.43494	0.0364325	16.6615	93.1426	-5.49278	3.43099e-05
IMZ28_RS00850	rpmJ	50S ribosomal protein L36 && PF00444:Ribosomal protein L36	293.633	524.252	-1.78649	0.00831808	576.275	996.464	-1.73051	0.0493812
IMZ28_RS01055		tRNA-Glu && -	20.5213	101.406	-4.94317	5.53818e-05	136.476	278.254	-2.04614	0.0165325
IMZ28_RS01220		tRNA-Arg && -	12.6557	54.4837	-4.29676	0.00167908	38.2118	149.714	-3.9207	2.13139e-08
IMZ28_RS01280		hypothetical protein && -	218.007	456.265	-2.09134	0.0142746	212.464	822.705	-3.86272	3.05623e-06
IMZ28_RS01325		tRNA-Phe && -	54.0815	245.997	-4.55389	5.8928e-08	293.532	868.218	-2.95904	1.81522e-06
IMZ28_RS01375	exbB	TonB-system energizer ExbB && PF01618:MotA/TolQ/ExbB proton channel family	289.93	489.806	-1.68825	0.00857446	452.047	971.086	-2.14597	0.000778791
IMZ28_RS01415		energy transducer TonB && PF03544:Gram-negative bacterial TonB protein C-terminal	62.8074	113.283	-1.80255	0.0462021	87.7623	305.888	-3.49667	1.04346e-08
IMZ28_RS01545		YdcH family protein && PF04325:Protein of unknown function (DUF465)	135.149	344.705	-2.54742	0.00475748	218.229	601.147	-2.74828	0.000544389
IMZ28_RS01560	rpmB	50S ribosomal protein L28 && PF00830:Ribosomal L28 family	449.134	1206.18	-2.68456	0.0032071	1126.15	2758.55	-2.44829	0.000152206
IMZ28_RS01600		hypothetical protein && -	159.715	330.216	-2.06569	0.0205183	181.589	647.914	-3.55779	8.98418e-05
IMZ28_RS01655		prepilin-type N-terminal cleavage/methylation domain-containing protein && PF13544:Type IV pilin N-term methylation site GFxxxE	184.353	417.645	-2.26377	0.0263865	151.711	688.506	-4.53065	8.23636e-05
IMZ28_RS01725		hypothetical protein && -	65.9978	161.529	-2.44239	0.00906685	126.32	491.22	-3.87158	2.82889e-10
IMZ28_RS01870	ribA	GTP cyclohydrolase II && PF00925:GTP cyclohydrolase II	219.193	424.836	-1.9376	0.000654415	397.015	1192.32	-2.99925	7.90176e-08
IMZ28_RS01875		hypothetical protein && PF13385:Concanavalin A-like lectin/glucanases superfamily	1028.89	2133.86	-2.07344	0.000139722	1853.47	3707.81	-2.00089	4.58715e-06
IMZ28_RS01890		hypothetical protein && -	74.8528	236.22	-3.15081	1.75934e-08	243.405	510.706	-2.09676	0.00130323
IMZ28_RS01895		ABC transporter ATP-binding protein && PF00005:ABC transporter|PF00664:ABC transporter transmembrane region	250.955	416.991	-1.66118	0.00555138	360.954	704.668	-1.95248	0.00717502
IMZ28_RS01940		hypothetical protein && -	113.406	196.645	-1.73494	0.00998042	187.617	313.618	-1.67085	0.00467034
IMZ28_RS01945		hypothetical protein && -	157.761	298.231	-1.89154	0.000504019	266.932	547.379	-2.04752	1.10406e-05
IMZ28_RS01995	pth	aminoacyl-tRNA hydrolase && PF01195:Peptidyl-tRNA hydrolase	291.013	586.453	-2.01548	4.21727e-05	636.218	1492.5	-2.34612	0.0013881
IMZ28_RS02140		Ppx/GppA family phosphatase && PF02541:Ppx/GppA phosphatase family	402.427	766.207	-1.90472	0.0032071	466.55	2517.41	-5.39448	1.96858e-08
IMZ28_RS02145		YfhL family 4Fe-4S dicluster ferredoxin && PF13237:4Fe-4S dicluster domain	313.552	655.378	-2.08942	0.00511985	302.034	2712.05	-8.967	1.1139e-12
IMZ28_RS02195	thrB	homoserine kinase && PF08544:GHMP kinases C terminal|PF00288:GHMP kinases N terminal domain	739.495	1007.58	-1.36221	0.047553	851.943	1380.42	-1.62015	0.000451693
IMZ28_RS02200		DUF448 domain-containing protein && PF04296:Protein of unknown function (DUF448)	252.472	397.753	-1.57587	0.00906685	342.24	683.394	-1.9944	0.00104376
IMZ28_RS02225	ubiE	bifunctional demethylmenaquinone methyltransferase/2-methoxy-6-polyprenyl-1%2C4-benzoquinol methylase UbiE && PF01209:ubiE/COQ5 methyltransferase family	216.989	351.826	-1.62108	0.0191871	327.739	672.543	-2.04875	0.000362073
IMZ28_RS02255		tRNA-Met && -	39.5719	222.288	-5.60131	4.90407e-10	163.656	461.246	-2.82649	1.50352e-06
IMZ28_RS02670		tRNA-Leu && -	22.7291	142.128	-6.23682	1.27089e-05	81.653	256.096	-3.13494	6.40243e-05
IMZ28_RS02675		HU family DNA-binding protein && PF00216:Bacterial DNA-binding protein	1953.01	5547.42	-2.84022	0.00258436	3703.89	7539.14	-2.03524	0.0121527
IMZ28_RS02720		phosphoesterase && PF02272:DHHA1 domain	226.917	383.599	-1.69106	0.00374302	329.993	747.686	-2.26761	5.81535e-08
IMZ28_RS02725		Rrf2 family transcriptional regulator && PF02082:Transcriptional regulator	185.167	343.581	-1.85651	0.00633992	209.194	857.853	-4.09253	9.28386e-16
IMZ28_RS02730	rpsO	30S ribosomal protein S15 && PF00312:Ribosomal protein S15	282.915	837.721	-2.96089	0.000108807	736.743	1668.86	-2.26591	7.82577e-05
IMZ28_RS02790		DUF1538 domain-containing protein && PF07556:Protein of unknown function (DUF1538)	234.613	340.54	-1.4525	0.0424947	257.745	549.784	-2.13524	5.01041e-05
IMZ28_RS02855		c-type cytochrome && PF00034:Cytochrome c	53.3958	97.0018	-1.8165	0.0364325	57.9004	500.118	-8.61874	4.7633e-11
IMZ28_RS02955		DUF1653 domain-containing protein && PF07866:Protein of unknown function (DUF1653)	131.244	211.677	-1.61284	0.0417166	101.525	351.615	-3.46058	0.00201978
IMZ28_RS03010		tRNA-Leu && -	37.0397	172.896	-4.65852	0.000208805	228.032	438.924	-1.92841	0.0261263
IMZ28_RS03105	rplU	50S ribosomal protein L21 && PF00829:Ribosomal prokaryotic L21 protein	1242.95	2001.63	-1.61036	0.00344626	2062.79	4056.21	-1.96609	0.000520197
IMZ28_RS03120	obgE	GTPase ObgE && PF01018:GTP1/OBG|PF01926:50S ribosome-binding GTPase	521.882	1074.1	-2.0577	0.00114324	950.154	2037.67	-2.14581	1.96229e-07
IMZ28_RS03260		hypothetical protein && -	881.737	1573.58	-1.78476	9.50655e-05	1119.49	2048.1	-1.82873	1.90454e-05
IMZ28_RS03270		rubredoxin && PF00301:Rubredoxin	1168.21	3235.33	-2.7694	0.00771402	151.123	1596.17	-10.5619	9.84291e-07
IMZ28_RS03320		DNA-directed RNA polymerase subunit omega && PF01192:RNA polymerase Rpb6	444.133	691.718	-1.55733	0.0494992	450.844	636.78	-1.41221	0.046506
IMZ28_RS03375		3-isopropylmalate dehydratase small subunit && PF00694:Aconitase C-terminal domain	120.51	260.159	-2.15674	0.000658286	231.026	739.254	-3.19659	8.08635e-10
IMZ28_RS03420		methyltransferase && PF05175:Methyltransferase small domain	185.672	362.904	-1.95458	0.00034156	221.203	621.568	-2.80713	0.000693207
IMZ28_RS03455		tetratricopeptide repeat protein && PF13414:TPR repeat	307.273	460.315	-1.49738	0.0364325	440.692	1190.19	-2.70057	9.95181e-07
IMZ28_RS03760		tRNA-Asn && -	11.948	48.0724	-4.0625	0.00190296	67.0325	160.305	-2.39508	0.000449508
IMZ28_RS04035		hypothetical protein && -	33.5102	120.033	-3.57179	0.0208231	72.3304	333.92	-4.58621	1.74185e-06
IMZ28_RS04075		TIGR02757 family protein && PF09674:Protein of unknown function (DUF2400)	112.622	242.557	-2.15051	0.000456675	200.245	367.832	-1.83747	0.00024935
IMZ28_RS04140	rnpA	ribonuclease P protein component && PF00825:Ribonuclease P	293.192	608.09	-2.076	3.12798e-05	398.798	999.946	-2.50529	0.000221158
IMZ28_RS04240		alpha/beta hydrolase && PF00561:alpha/beta hydrolase fold	291.75	525.956	-1.80312	0.00335458	355.195	636.668	-1.79105	0.00837854
IMZ28_RS04395		sulfite exporter TauE/SafE family protein && PF01925:Sulfite exporter TauE/SafE	249.065	423.216	-1.69884	0.00232667	369.092	726.841	-1.97034	8.12768e-07
IMZ28_RS04435	greA	transcription elongation factor GreA && PF01272:Transcription elongation factor, GreA/GreB, C-term|PF03449:Transcription elongation factor, N-terminal	284.488	457.008	-1.6049	0.0469393	511.424	990.572	-1.93577	0.0118112
IMZ28_RS04525		AMP-binding protein && PF00501:AMP-binding enzyme	2665.69	5013.89	-1.88107	0.0441864	470.523	5095.87	-10.8321	1.30254e-05
IMZ28_RS04555		DUF2892 domain-containing protein && PF11127:Protein of unknown function (DUF2892)	47.9643	152.307	-3.17268	3.36285e-05	79.2969	652.22	-8.18977	9.637e-17
IMZ28_RS04700	folK	2-amino-4-hydroxy-6-hydroxymethyldihydropteridine diphosphokinase && PF01288:7,8-dihydro-6-hydroxymethylpterin-pyrophosphokinase (HPPK)	173.108	302.195	-1.74693	0.00215451	219.052	675.81	-3.08498	6.40601e-10
IMZ28_RS04725		DUF2062 domain-containing protein && PF09835:Uncharacterized protein conserved in bacteria (DUF2062)	117.771	209.552	-1.77846	0.00839715	167.437	567.066	-3.38027	0.00019931
IMZ28_RS04980		cytochrome c && PF13442:Cytochrome C oxidase, cbb3-type, subunit III	21.0649	50.4559	-2.40212	0.0285378	31.5767	153.578	-4.82925	2.51341e-07
IMZ28_RS04985		cold-shock protein && PF00313:'Cold-shock' DNA-binding domain	5108.44	15601.1	-3.05391	1.01402e-05	4747.19	13496.9	-2.8432	0.000992654
IMZ28_RS05030		tRNA-Ser && -	7.80412	27.0427	-3.46968	0.0169564	18.8127	83.968	-4.4927	1.01459e-08
IMZ28_RS05035		DNA polymerase IV && PF00817:impB/mucB/samB family	47.0481	89.3942	-1.8962	0.018226	101.409	177.298	-1.74559	0.00395638
IMZ28_RS05070		DoxX family protein && PF07681:DoxX	1175.26	2416.49	-2.05646	0.021769	311.607	2624.63	-8.42589	8.57864e-06
IMZ28_RS05140		hypothetical protein && -	89.8454	225.765	-2.50802	0.0159988	122.511	729.144	-5.94054	8.98418e-05
IMZ28_RS05145		hypothetical protein && -	1426.86	2454.39	-1.71987	0.0443921	1215.11	5012.38	-4.12519	3.29606e-07
IMZ28_RS05245		tRNA-Met && -	4.11421	27.4918	-6.59388	0.00939014	35.6034	84.0989	-2.38386	0.0450595
IMZ28_RS05330		uracil-DNA glycosylase && PF03167:Uracil DNA glycosylase superfamily	257.476	422.749	-1.64048	0.00769565	399.511	669.494	-1.67377	0.0120714
IMZ28_RS05505		hypothetical protein && -	111.052	244.436	-2.19799	0.001298	338.781	1437.17	-4.24274	0.000210025
IMZ28_RS05645		transposase && PF01797:Transposase IS200 like	39.2185	118.871	-3.02477	0.00393884	38.1563	308.975	-8.05128	4.26719e-16
IMZ28_RS05700		CDP-alcohol phosphatidyltransferase family protein && PF01066:CDP-alcohol phosphatidyltransferase	38.5376	90.1777	-2.34664	0.00649907	63.4131	160.914	-2.53963	0.000722846
IMZ28_RS05710		hypothetical protein && -	600.943	1229.73	-2.04577	8.47488e-07	840.027	2631.78	-3.13191	2.92461e-10
IMZ28_RS05790		hypothetical protein && -	87.9877	192.013	-2.17974	0.00070028	167.079	523.625	-3.12971	0.00289573
IMZ28_RS05885		hypothetical protein && -	74.8029	257.811	-3.44228	0.00246471	56.6795	356.907	-6.28591	1.02678e-17
IMZ28_RS05890		hypothetical protein && -	16.4336	42.9837	-2.60442	0.0266383	23.1852	72.4706	-3.09352	0.000579299
IMZ28_RS06305	ybeY	rRNA maturation RNase YbeY && PF02130:Uncharacterized protein family UPF0054	69.1973	143.41	-2.0747	0.0051828	110.634	266.61	-2.39803	0.0010485
IMZ28_RS06430		paraquat-inducible protein A && PF04403:Paraquat-inducible protein A	132.992	247.524	-1.85787	0.0155	160.517	549.404	-3.42013	0.000513184
IMZ28_RS06435		paraquat-inducible protein A && PF04403:Paraquat-inducible protein A	43.5679	85.4655	-1.9578	0.0170953	67.4459	123.368	-1.81869	0.0185096
IMZ28_RS06510		hypothetical protein && -	286.624	651.537	-2.27203	0.00333073	295.314	2460.61	-8.33442	1.37893e-07
IMZ28_RS06555		hypothetical protein && PF13435:Cytochrome c554 and c-prime	117.282	210.281	-1.79214	0.0261574	308.08	909.524	-2.95091	0.00162555
IMZ28_RS06560		hypothetical protein && -	501.916	767.66	-1.52979	0.00775028	619.9	2507.39	-4.04497	0.00739365
IMZ28_RS06620		hypothetical protein && -	161.573	337.653	-2.08958	0.00148121	214.112	442.01	-2.06825	6.25612e-05
IMZ28_RS06880		tRNA-Gly && -	39.3264	209.607	-5.33161	5.40684e-08	133.362	630.362	-4.73174	1.43002e-07
IMZ28_RS07015		tRNA-Ile && -	9.56803	45.5126	-4.76434	0.000364521	35.8193	96.1121	-2.71548	0.00886152
IMZ28_RS07240		transglutaminase domain-containing protein && PF01841:Transglutaminase-like superfamily	142.524	249.684	-1.75342	0.00734274	205.295	511.794	-2.49057	9.19495e-08
IMZ28_RS07420	accC	acetyl-CoA carboxylase biotin carboxylase subunit && PF00289:Carbamoyl-phosphate synthase L chain, N-terminal domain|PF02785:Biotin carboxylase C-terminal domain|PF02786:Carbamoyl-phosphate synthase L chain, ATP binding domain	238.507	504.885	-2.11744	0.00131056	190.937	377.521	-1.97235	0.0225035
IMZ28_RS07500		type II toxin-antitoxin system RelE/ParE family toxin && PF05973:Phage derived protein Gp49-like (DUF891)	274.828	519.299	-1.88965	0.025169	239.523	3316.41	-13.846	5.45384e-06
IMZ28_RS07600		hypothetical protein && -	530.772	1221.95	-2.30221	0.00753686	274.993	1759.73	-6.39962	3.59367e-06
IMZ28_RS07615		outer membrane beta-barrel protein && PF13505:Outer membrane protein beta-barrel domain	2042.72	9547.95	-4.67478	2.22859e-22	2143.74	8939.22	-4.17	0.0148708
IMZ28_RS07760		hypothetical protein && -	115.972	240.92	-2.07387	0.00862691	175.594	427.351	-2.4282	0.000288582
IMZ28_RS07895		ferritin-like domain-containing protein && PF04305:Protein of unknown function (DUF455)	387.588	603.135	-1.55663	0.0409795	598.244	1057.25	-1.76892	0.00145625
IMZ28_RS07910		response regulator transcription factor && PF00486:Transcriptional regulatory protein, C terminal	953.741	1501.99	-1.57488	0.00291902	1500.1	4288.34	-2.85894	1.84437e-06
IMZ28_RS07950		1-acyl-sn-glycerol-3-phosphate acyltransferase && PF01553:Acyltransferase	96.0027	185.69	-1.93191	0.00538412	185.448	360.978	-1.94196	0.00394183
IMZ28_RS07960	acpS	holo-ACP synthase && PF01648:4'-phosphopantetheinyl transferase superfamily	41.5191	95.9276	-2.31229	0.0123028	74.2102	340.316	-4.55308	1.37893e-07
IMZ28_RS08180		ABC-F family ATP-binding cassette domain-containing protein && PF12848:ABC transporter|PF00005:ABC transporter	575.544	922.219	-1.60318	0.0392935	375.389	1556.6	-4.14471	8.61575e-10
IMZ28_RS08355		hypothetical protein && -	124.533	253.355	-2.02942	0.00280022	279.246	581.835	-2.07997	2.49294e-05
IMZ28_RS08425		hypothetical protein && -	151.709	242.468	-1.59926	0.0329365	186.041	350.469	-1.87895	0.0464233
IMZ28_RS08435		molecular chaperone TorD family protein && PF02613:Nitrate reductase delta subunit	242.444	527.621	-2.17504	0.000676698	364.889	1041.87	-2.8531	0.00305907
IMZ28_RS08465	dapE	succinyl-diaminopimelate desuccinylase && PF01546:Peptidase family M20/M25/M40|PF07687:Peptidase dimerisation domain	1480.97	2834.66	-1.91402	0.006945	1182.31	4359.24	-3.68666	3.70486e-14
IMZ28_RS08510		cation:proton antiporter && PF00999:Sodium/hydrogen exchanger family	1122.32	1617.82	-1.44125	0.026024	1011.09	2376.45	-2.35031	0.0148708
IMZ28_RS08520		DUF1882 domain-containing protein && PF08966:Domain of unknown function (DUF1882)	47.7384	94.7543	-1.98892	0.0376075	72.4898	188.119	-2.58755	8.77389e-06
IMZ28_RS08585		thioredoxin family protein && PF13899:Thioredoxin-like	110.581	347.959	-3.14925	4.7439e-06	90.7924	218.067	-2.39189	0.02583
IMZ28_RS08710		RNA pyrophosphohydrolase && PF00293:NUDIX domain	255.75	472.849	-1.84721	0.0493885	285.524	756.97	-2.64626	4.70733e-05
IMZ28_RS08770		MFS transporter && PF07690:Major Facilitator Superfamily	556.68	930.619	-1.67162	0.00175238	609.95	1751.12	-2.86972	0.000413574
IMZ28_RS08805		TlpA family protein disulfide reductase && PF13905:Thioredoxin-like	1144.26	2122.06	-1.85482	0.0356907	704.421	2844.8	-4.03819	0.00213341
IMZ28_RS08920		hypothetical protein && -	63.2272	142.106	-2.24167	0.00695689	81.2951	183.641	-2.246	0.0070911
IMZ28_RS09130	smpB	SsrA-binding protein SmpB && PF01668:SmpB protein	138.738	220.711	-1.58881	0.0329365	174.266	432.643	-2.48135	2.13194e-05
IMZ28_RS09145	rplS	50S ribosomal protein L19 && PF01245:Ribosomal protein L19	610.4	1040.33	-1.70383	0.000815151	1095.22	2953.86	-2.69664	0.00338252
IMZ28_RS09155	rimM	16S rRNA processing protein RimM && PF01782:RimM N-terminal domain	394.108	846.398	-2.14937	1.1335e-05	724.838	1460.64	-2.01579	0.00279018
IMZ28_RS09160		KH domain-containing protein && PF13083:KH domain	368.928	680.854	-1.84751	0.00960689	447.33	1223.38	-2.73563	2.61191e-07
IMZ28_RS09170		sel1 repeat family protein && -	194.602	428.772	-2.2	0.00393884	334.864	840.209	-2.50728	4.58018e-05
IMZ28_RS09325		hypothetical protein && -	29.4399	87.4816	-2.96206	0.00061998	56.6488	304.513	-5.33499	3.53361e-06
IMZ28_RS09360		hypothetical protein && -	81.015	153.113	-1.88998	0.0159757	165.167	252.196	-1.52297	0.0385438
IMZ28_RS09470		phosphatase PAP2 family protein && PF01569:PAP2 superfamily	374.975	586.232	-1.5636	0.0469393	278.195	1071.15	-3.84761	0.000206515
IMZ28_RS09640		hypothetical protein && -	445.196	1118.39	-2.51152	0.0266383	521.517	3619.99	-6.93649	1.21497e-07
IMZ28_RS09730	tsaA	tRNA (N6-threonylcarbamoyladenosine(37)-N6)-methyltransferase TrmO && PF01980:Uncharacterised protein family UPF0066	107.249	277.957	-2.58796	3.2276e-05	409.119	959.942	-2.34507	0.000509385
IMZ28_RS09735		NifB/NifX family molybdenum-iron cluster-binding protein && PF02579:Dinitrogenase iron-molybdenum cofactor	118.527	248.281	-2.09303	0.00527186	413.333	1479.96	-3.5786	1.80535e-06
IMZ28_RS09990		tRNA-Pro && -	19.1516	54.3616	-2.85449	0.0252286	39.235	102.005	-2.61724	1.30748e-05
IMZ28_RS10000		polyprenyl synthetase family protein && PF00348:Polyprenyl synthetase	269.861	489.966	-1.81503	0.000310152	390.318	975.734	-2.49723	2.29261e-06
IMZ28_RS10005		hypothetical protein && -	125.291	345.684	-2.75664	0.00061998	156.881	424.043	-2.69678	0.00999841
IMZ28_RS10120		hypothetical protein && -	134.679	331.286	-2.45694	0.00193851	167.664	750.35	-4.46922	4.92753e-07
IMZ28_RS10125		hypothetical protein && -	110.589	253.129	-2.29114	0.00034156	268.876	739.325	-2.75079	1.04935e-05
IMZ28_RS10180	secE	preprotein translocase subunit SecE && PF00584:SecE/Sec61-gamma subunits of protein translocation complex	257.347	477.718	-1.85793	0.00387739	440.081	915.008	-2.08094	0.00439089
IMZ28_RS10205		tRNA-Gly && -	81.0373	367.45	-4.52895	2.32528e-05	299.995	648.046	-2.16371	0.00877069
IMZ28_RS10210		tRNA-Tyr && -	85.2961	265.376	-3.11144	0.000721996	273.389	662.808	-2.4274	0.0298592
IMZ28_RS10260		hypothetical protein && PF04324:BFD-like [2Fe-2S] binding domain	106.324	201.328	-1.89016	0.0145224	147.093	450.963	-3.05455	7.80501e-06
IMZ28_RS10265		helix-turn-helix domain-containing protein && PF07022:Bacteriophage CI repressor helix-turn-helix domain|PF00717:Peptidase S24-like	240.629	385.696	-1.60181	0.0172766	333.631	963.78	-2.8875	0.00114649
IMZ28_RS10475		hypothetical protein && -	84.0398	162.632	-1.93653	0.00669418	121.158	291.541	-2.41266	2.43879e-07
IMZ28_RS10480		L%2CD-transpeptidase && PF03734:L,D-transpeptidase catalytic domain	276.016	506.709	-1.83688	0.00192899	329.622	1111.77	-3.37201	2.7681e-19
IMZ28_RS10550	rpsT	30S ribosomal protein S20 && PF01649:Ribosomal protein S20	392.225	1316.67	-3.35553	0.000331317	1087.45	3002.98	-2.76028	1.51431e-09
IMZ28_RS10635	secG	preprotein translocase subunit SecG && PF03840:Preprotein translocase SecG subunit	285.903	546.95	-1.91188	0.000745692	573.669	1420.39	-2.47375	1.43477e-08
IMZ28_RS10745		tRNA-Val && -	8.56392	31.1388	-3.65013	0.00831619	20.2682	61.0496	-3.00487	7.92347e-05
IMZ28_RS10900		hypothetical protein && PF13541:Subunit ChlI of Mg-chelatase	22.4726	52.3791	-2.33535	0.046114	37.3548	173.237	-4.58798	1.99473e-06
Novel00001		-	128.006	218.208	-1.70244	0.0332414	114.041	577.489	-5.06304	0.000164889
Novel00003		-	611.67	1186.59	-1.94017	0.00839715	354.765	5838.28	-16.4475	4.34781e-15
Novel00007		PF00216:Bacterial DNA-binding protein	114.446	232.562	-2.0322	0.0191871	96.5502	583.873	-6.03586	7.32094e-05
Novel00010		-	393.08	672.787	-1.71131	0.00474695	209.612	1396.13	-6.65742	0.00108241
Novel00015		PF08267:Cobalamin-independent synthase, N-terminal domain	44.5159	129.463	-2.90107	0.000296598	41.7514	513.432	-12.2743	2.04806e-09
Novel00017		PF00044:Glyceraldehyde 3-phosphate dehydrogenase, NAD binding domain	130.056	366.368	-2.81652	8.50959e-05	104.177	1557.95	-14.9303	2.20584e-16
Novel00018		PF04461:Protein of unknown function (DUF520)	59.1864	174.833	-2.96075	0.000768561	25.9043	1071.48	-41.0373	4.53853e-24
sRNA00004		-	698.249	2312.83	-3.31201	0.00370197	398.982	2663.83	-6.67313	8.99504e-07
sRNA00009		-	31.4921	92.9171	-2.96782	0.0035838	51.0002	168.164	-3.32797	0.000123873
sRNA00018		-	25.0488	146.87	-5.83156	2.89457e-08	77.158	442.275	-5.69364	3.84673e-10
sRNA00023		-	125.376	259.329	-2.06971	0.00300687	231.168	995.359	-4.30013	2.11878e-17
sRNA00035		-	110.269	997.401	-9.04044	0.00771402	432.325	1595.93	-3.69289	0.0112045
sRNA00036		-	79.7199	274.825	-3.45636	0.000190765	176.34	403.468	-2.29371	0.000318156
sRNA00048		-	100.778	274.467	-2.72486	8.19187e-05	38.2296	227.114	-5.92503	3.16419e-05
sRNA00054		-	45.8748	155.811	-3.39443	0.00316488	50.1741	248.751	-4.94968	0.000757676
sRNA00060		-	148.141	332.985	-2.24991	0.0472686	42.4227	711.772	-16.7704	2.09037e-09
sRNA00087		-	204.316	559.946	-2.73761	0.00018239	202.468	1013.38	-4.99862	0.00333095
sRNA00107		-	37.7599	128.242	-3.41277	3.36285e-05	52.5664	327.128	-6.23814	5.35867e-08
