# Supplementary material for: Transcriptome Analysis of Cyclooctasulfur Oxidation and Reduction by the Neutrophilic Chemolithoautotrophic Sulfurovum indicum from Deep-Sea Hydrothermal Ecosystems
Source: Antioxidants (Basel). 2023 Mar 3;12(3):627. doi: 10.3390/antiox12030627 (PMC10045233; doi:10.3390/antiox12030627)
Supplement: Supplementary file 1 [file antioxidants-12-00627-s001.zip › Table S3.xls]

## Sheet: sheet1
Table S3. Differential expression of genes involved in transport and ATPase under S0 oxidation and reduction.
Gene_id	Gene name	Gene_description	S0 oxidation	Na2S2O3 oxidation	FoldChange	padj	S0 reduction	NaNO3 reduction	FoldChange	padj
IMZ28_RS00125		ABC transporter permease && PF02687:FtsX-like permease family|PF12704:MacB-like periplasmic core domain	460.509	321.875	1.43091	0.0484448	471.848	209.889	2.24545	6.24911e-05
IMZ28_RS02590	uvrC	ABC subunit UvrC && PF01541:GIY-YIG catalytic domain|PF08459:UvrC Helix-hairpin-helix N-terminal	388.908	249.472	1.55924	0.0150326	459.155	116.126	3.95011	2.44754e-13
IMZ28_RS09850		ABC transporter ATP-binding protein && PF07673:Protein of unknown function (DUF1602)|PF00005:ABC transporter	603.087	380.471	1.5852	0.0210184	631.884	227.278	2.77872	1.09413e-05
IMZ28_RS09855		ABC transporter permease && PF00528:Binding-protein-dependent transport system inner membrane component	408.229	250.705	1.62862	0.0131803	456.171	131.594	3.46611	3.29606e-07
IMZ28_RS00555		TAXI family TRAP transporter solute-binding subunit && PF16868:NMT1-like family transporter solute receptor, family precursor	9064.11	4004.75	2.2634	3.17231e-05	13412.6	1494.59	8.97426	1.32926e-13
IMZ28_RS00560		TRAP transporter permease && PF11874:Domain of unknown function (DUF3394)|PF06808:Tripartite ATP-independent periplasmic transporter, DctM component C4-dicarboxylate ABC transporter	12755.2	4800.61	2.657	8.31904e-06	16001.6	1758.72	9.09856	1.38471e-11
IMZ28_RS06185		TRAP transporter substrate-binding protein && PF03480:Bacterial extracellular solute-binding protein, family 7	1335.43	865.651	1.54261	0.0039128	1519.51	928.348	1.63609	0.00662064
IMZ28_RS01810		BadF/BadG/BcrA/BcrD ATPase family	881.18	594.467	1.48217	0.0437427	893.406	202.504	4.40878	2.90578e-13
IMZ28_RS10785		MoxR family ATPase && PF07726:ATPase family associated with various cellular activities (AAA)	757.176	364.32	2.07765	0.000476156	733.566	101.082	7.25204	1.71561e-15
IMZ28_RS07155		AAA family ATPase && PF10431:C-terminal, D2-small domain, of ClpB protein|PF07724:AAA domain (Cdc48 subfamily)	353.586	191.249	1.84985	0.00816524	430.443	271.683	1.58392	0.0160219
