# Supplementary material for: Transcriptome Analysis of Cyclooctasulfur Oxidation and Reduction by the Neutrophilic Chemolithoautotrophic Sulfurovum indicum from Deep-Sea Hydrothermal Ecosystems
Source: Antioxidants (Basel). 2023 Mar 3;12(3):627. doi: 10.3390/antiox12030627 (PMC10045233; doi:10.3390/antiox12030627)
Supplement: Supplementary file 1 [file antioxidants-12-00627-s001.zip › Table S4.xls]

## Sheet: Sheet5
Table S4 Distribution of genes encoding polysulfide reductase in the genomes of cultured isolates and metagenome-assembled genomes (MAGs) of the genus Sulfurovum.
Organism Name	Completeness	Contamination	Size	GC Content	BioSample Accession	GenBank Accessions	Isolation Source	PsrA1B1C1	PsrA2B2	PsrA3B3C3 (PsrA4B4C4)
Pure culture
Sulfurovum indicum ST-419	99.73	0.271	2.211	42.54	SAMN16427069	CP063164	hydrothermal vent	1	1	2
Sulfurovum riftiae1812E	99.67	0.401	2.375	45.76	SAMN04247392	LNKT00000000	hydrothermal vent polychaete Riftia pachyptila	1	1	0
Sulfurovum lithotrophicumATCC BAA-797	99.61	0.556	2.225	40.35	SAMN03494311	CP011308	hydrothermal vent	1	1	0
Sulfurovum sp. NBC37-1	99.59	0.614	2.562	43.97	SAMD00060915	AP009179	deep-sea hydrothermal vent	1	1	0
Sulfurovum sp. HSL1-3	99.59	2.663	2.971	43.61	SAMN23019562	CP087124	mangrove sediment	1	0	1
Sulfurovum sp. XGS-02	99.59	2.254	2.193	40.29	SAMN26560254	CP093312	intertidal sediment	1	2	0
Metagenome
Hydrothermal vents
Sulfurovum sp. UBA1140	97.43	2.459	2.007	35.87	SAMN06457723	DCAF00000000	beebe hydrothermal vent plume at at depth of 4900m	1	0	0
Sulfurovum sp. strain MAG 65	65.39	3.172	1.286	35.22	SAMN09407881	QOAA00000000	hydrothermal vent	1	0	0
Sulfurovum sp. strain MAG 42	50	6.034	1.201	36.26	SAMN09407880	QNZZ00000000	hydrothermal vent	0	1	0
Sulfurovum sp. strain MAG 41	87.63	3.381	1.661	46.14	SAMN09407879	QNZY00000000	hydrothermal vent	0	1	0
Sulfurovum sp. strain MAG 30	95.08	1.639	2.413	34.79	SAMN09407878	QNZX00000000	hydrothermal vent	0	0	0
Sulfurovum sp. strain MAG 2	85.33	1.434	1.58	34.8	SAMN09407877	QNZW00000000	hydrothermal vent	1	0	0
Sulfurovum sp. strain MAG 135	76.21	0	1.637	32.52	SAMN09407876	QNZV00000000	hydrothermal vent	0	0	0
Sulfurovum sp. strain bin23	96.31	2.185	1.944	38.34	SAMN13172856	JAAXPZ000000000	marine hydrothermal vent chimney	0	0	1
Sulfurovum sp. strain UWMA-0163	63.56	8.319	1.481	35.03	SAMN10967506	DTWL00000000	dilute Hydrothermal Plume	0	0	1
Sulfurovum sp. strain S017_11	56.76	1.229	0.989	45.16	SAMN12876449	WFST00000000	deep-sea hydrothermal deposit	0	0	0
Sulfurovum sp. strain S014_24	96.72	0.867	2.212	43.97	SAMN12876397	WFRE00000000	deep-sea hydrothermal deposit	1	1	2
Sulfurovum sp. strain S141_75	88.11	6.147	1.796	47.17	SAMN12876559	WFYB00000000	deep-sea hydrothermal deposit	0	1	0
Sulfurovum sp. strain S009_13	84.84	8.673	2.09	37.15	SAMN12876277	WFMG00000000	deep-sea hydrothermal deposit	0	0	0
Sulfurovum sp. strain S013_39	81.18	6.752	2.167	36.3	SAMN12876387	WFQK00000000	deep-sea hydrothermal deposit	1	1	1
Sulfurovum sp. strain S145_31	87.29	4.098	2.647	45.97	SAMN12876713	WGDG00000000	deep-sea hydrothermal deposit	1	1	0
Sulfurovum sp. strain S145_27_esom	99.12	0.409	2.163	44.31	SAMN12876702	WGDD00000000	deep-sea hydrothermal deposit	1	1	2
Sulfurovum sp. strain S144_53	86.47	3.608	1.763	46	SAMN12876674	WGCF00000000	deep-sea hydrothermal deposit	1	1	0
Sulfurovum sp. strain SZUA-1537	95.47	4.521	1.898	39.19	SAMN09926543	DQVY00000000	mid-Cayman Rise Vent Fluids	1	0	1
Sulfurovum sp. strain SZUA-1512	85.44	6.762	1.921	35.37	SAMN09926528	DQVJ00000000	mid-Cayman Rise Vent Fluids	1	1	1
Sulfurovum sp. strain SZUA-1428	75.95	2.107	1.307	38.72	SAMN09926484	DQTR00000000	mid-Cayman Rise Vent Fluids	0	0	1
Sulfurovum sp. strain SZUA-1400	66.73	7.377	1.457	35.94	SAMN09926468	DQTB00000000	mid-Cayman Rise Vent Fluids	0	0	1
Sulfurovum sp. strain SZUA-1390	80.75	2.459	1.708	40.65	SAMN09926464	DQSX00000000	mid-Cayman Rise Vent Fluids	0	1	0
Sulfurovum sp. strain 13-A	97.54	2.254	1.432	37.83	SAMN15029599	JAIZPB000000000	deep-sea hydrothermal vent mollusc metagenome	1	1	0
Sulfurovum sp. strain 13-B	98.15	1.024	1.394	37.31	SAMN15029598	JAIZPA000000000	deep-sea hydrothermal vent mollusc metagenome	1	1	0
Sulfurovum sp. strain 12-A	97.13	1.229	1.546	38	SAMN15029597	JAIZOZ000000000	deep-sea hydrothermal vent mollusc metagenome	1	1	0
Sulfurovum sp. strain 10-B	97.95	2.049	1.43	37.62	SAMN15029592	JAIZOU000000000	deep-sea hydrothermal vent mollusc metagenome	1	1	0
Sulfurovum sp. strain 11-B	97.54	2.459	1.453	37.45	SAMN15029594	JAIZOW000000000	deep-sea hydrothermal vent mollusc metagenome	1	1	0
Sulfurovum sp. strain 10-A	98.77	2.049	1.554	37.77	SAMN15029593	JAIZOV000000000	deep-sea hydrothermal vent mollusc metagenome	1	1	0
Sulfurovum sp. strain 6-A	98.77	1.434	1.389	37.25	SAMN15029585	JAIZON000000000	deep-sea hydrothermal vent mollusc metagenome	1	1	0
Sulfurovum sp. strain 11-A	98.77	1.639	1.525	37.83	SAMN15029595	JAIZOX000000000	deep-sea hydrothermal vent mollusc metagenome	1	1	0
Sulfurovum sp. strain 12-B	97.95	0.614	1.382	37.25	SAMN15029596	JAIZOY000000000	deep-sea hydrothermal vent mollusc metagenome	1	1	0
Sulfurovum sp. strain 8-A	98.56	2.868	1.6	37.64	SAMN15029589	JAIZOR000000000	deep-sea hydrothermal vent mollusc metagenome	1	1	0
Sulfurovum sp. strain 7-A	98.77	0.819	1.763	37.71	SAMN15029587	JAIZOP000000000	deep-sea hydrothermal vent mollusc metagenome	1	1	0
Sulfurovum sp. strain 9-A	97.95	1.434	1.576	37.75	SAMN15029591	JAIZOT000000000	deep-sea hydrothermal vent mollusc metagenome	1	1	0
Sulfurovum sp. strain 9-B	98.36	1.229	1.46	37.81	SAMN15029590	JAIZOS000000000	deep-sea hydrothermal vent mollusc metagenome	1	1	0
Sulfurovum sp. strain 8-B	97.95	2.459	1.553	37.93	SAMN15029588	JAIZOQ000000000	deep-sea hydrothermal vent mollusc metagenome	1	1	0
Sulfurovum sp. strain 4-A	99.18	2.663	1.745	37.5	SAMN15029581	JAIZOJ000000000	deep-sea hydrothermal vent mollusc metagenome	1	1	0
Sulfurovum sp. strain 6-B	99.18	1.297	1.747	37.85	SAMN15029584	JAIZOM000000000	deep-sea hydrothermal vent mollusc metagenome	1	1	0
Sulfurovum sp. strain 5-A	99.18	4.098	1.845	37.43	SAMN15029583	JAIZOL000000000	deep-sea hydrothermal vent mollusc metagenome	1	1	0
Sulfurovum sp. strain 2	96.1	3.893	1.314	37.53	SAMN15029578	JAIZOG000000000	deep-sea hydrothermal vent mollusc metagenome	1	1	0
Sulfurovum sp. strain 7-B	99.18	1.229	1.725	37.67	SAMN15029586	JAIZOO000000000	deep-sea hydrothermal vent mollusc metagenome	1	1	0
Sulfurovum sp. strain 1	98.15	0.819	1.466	37.5	SAMN15029577	JAIZOF000000000	deep-sea hydrothermal vent mollusc metagenome	1	1	0
Sulfurovum sp. strain 4-B	99.18	2.254	1.764	37.79	SAMN15029580	JAIZO000000000	deep-sea hydrothermal vent mollusc metagenome	1	1	0
Sulfurovum sp. strain 5-B	99.59	3.688	1.966	37.31	SAMN15029582	JAIZOK000000000	deep-sea hydrothermal vent mollusc metagenome	1	1	0
Sulfurovum sp. strain 3	96.31	1.434	1.333	37.42	SAMN15029579	JAIZOH000000000	deep-sea hydrothermal vent mollusc metagenome	1	1	0
Sulfurovum sp.bin30011	78.68	2.395	1.508	47.75	SAMN29618309	JANTHM000000000	hydrothermal vent sediment	1	0	1
Sulfurovum sp.bin2006	73.47	1.639	1.356	47.67	SAMN29618305	JANTHI000000000	hydrothermal vent sediment	0	0	0
Sulfurovum sp.bin1001	71.51	0.409	1.133	32.34	SAMN29618250	JANTFF000000000	hydrothermal vent sediment	1	1	1
Sulfurovum sp.bin20011	97.33	3.005	2.108	41.26	SAMN29618300	JANTHD000000000	hydrothermal vent sediment	1	0	2
Sulfurovum sp.bin30019	97.95	2.595	2.086	41.37	SAMN29618314	JANTHR000000000	hydrothermal vent sediment	1	0	2
Sulfurovum sp.bin10034	91.39	2.663	1.983	46.42	SAMN29618271	JANTGA000000000	hydrothermal vent sediment	0	1	2
Sulfurovum sp.AUK004	87.58	3.808	1.873	38.21	SAMN18353500	JAGGRU000000000	marine hydrothermal sediment	1	0	1
Biofilm
Sulfurovum sp. AS07-7	98.77	69.28	2.744	33.85	SAMN03002792	JQIP00000000	biofilm from sulfidic cave	1	0	0
Sulfurovum sp. PC08-66	91.37	32.75	2.112	41.16	SAMN03002793	JQIQ00000000	pozzo dei Cristalli sulfidic cavestream	0	0	1
Sulfurovum sp. FS06-10	94.12	18.64	2.644	35.34	SAMN03002794	JQIR00000000	sulfidic fissure spring	1	0	2
Sulfurovum sp. FS08-3	98.36	0.819	2.544	39.67	SAMN03002795	JQIS00000000	sulfidic fissure spring - flowing	1	1	0
Sulfurovum sp. strain HLG_WM_MAG_03	82.47	5.381	2.63	32.99	SAMEA6463001	CACVAR0000000000	white filamentous biomass growing on seagrass stems near kelp deposits on a beach at Helgoland	1	2	0
Sulfurovum sp. strain HLG_WM_MAG_06	96.21	2.117	2.963	33.01	SAMEA6463004	CACVAP0000000000	white filamentous biomass growing on seagrass stems near kelp deposits on a beach at Helgoland	1	2	0
Sulfurovum sp. strain HLG_WM_MAG_04	87.56	3.551	2.395	34.18	SAMEA6463002	CACVAX000000000	white filamentous biomass growing on seagrass stems near kelp deposits on a beach at Helgoland	1	1	0
Sulfurovum sp. strain HLG_WM_MAG_02	81.19	0.614	2.427	33.03	SAMEA6463000	CACVAZ000000000	white filamentous biomass growing on seagrass stems near kelp deposits on a beach at Helgoland	1	1	0
Sulfurovum sp. strain HLG_WM_MAG_01	99.18	5.532	3.115	34.83	SAMEA6462999	CACVAS000000000	white filamentous biomass growing on seagrass stems near kelp deposits on a beach at Helgoland	1	1	0
Sulfurovum sp. strain HLG_WM_MAG_05	91.62	7.889	3.078	32.82	SAMEA6463003	CACVAU000000000	white filamentous biomass growing on seagrass stems near kelp deposits on a beach at Helgoland	1	1	0
Sulfurovum sp. strain SulCav_GS10_10_3_46_26	96.31	2.459	1.684	45.88	SAMN22209606	DYRO00000000	biofilm from sulfidic cave	1	0	1
Sulfurovum sp. strain SulCav_GS10_10_2_45_11	61.06	2.773	1.022	44.52	SAMN22209605	DYRN00000000	biofilm from sulfidic cave	0	1	1
Sulfurovum sp. strain SulCav_GS10_10_38_56	97.48	0.409	1.878	38.26	SAMN22209604	DYRM00000000	biofilm from sulfidic cave	1	0	0
Sulfurovum sp. strain SulCav_GS09_5_38_897	96.17	0.409	1.798	38.3	SAMN22209552	DYPM00000000	biofilm from sulfidic cave	1	0	0
Sulfurovum sp. strain SulCav_FS08_3_45_16	95.28	1.229	1.576	44.72	SAMN22209497	DYNJ00000000	biofilm from sulfidic cave	0	0	1
Sulfurovum sp. strain SulCav_FS08_3_3_40_44	96.51	1.229	2.501	40.08	SAMN22209499	DYNL00000000	biofilm from sulfidic cave	1	1	0
Sulfurovum sp. strain SulCav_FS06-10_2_36_100	76.43	2.049	1.379	35.81	SAMN22209484	DYMW00000000	biofilm from sulfidic cave	0	0	1
Sulfurovum sp. strain SulCav_FS08_3_2_36_14	93.85	4.685	2.193	35.77	SAMN22209498	DYNK00000000	biofilm from sulfidic cave	0	0	1
Sulfurovum sp. strain SulCav_FS06-10_3_36_27	95.69	0.819	1.241	35.76	SAMN22209485	DYMX00000000	biofilm from sulfidic cave	0	0	1
Sulfurovum sp. strain SulCav_FS06-10_34_7825	82.37	1.434	1.652	33.95	SAMN22209483	DYMV00000000	biofilm from sulfidic cave	1	1	0
Sulfurovum sp. strain SulCav_FS06-10_4_41_10	91.73	2.324	1.813	41.13	SAMN22209474	DYMM00000000	biofilm from sulfidic cave	1	1	1
Sulfurovum sp. strain SulCav_AS07-7_2_35_16022	95.93	0.409	1.198	35.29	SAMN22209461	DYLZ00000000	biofilm from sulfidic cave	0	0	1
Sulfurovum sp. strain SulCav_AS07-7_34_77	94.53	0.819	1.65	33.67	SAMN22209460	DYLY00000000	biofilm from sulfidic cave	1	0	0
Sulfurovum sp. strain SulCav_AS07-7_3_40_14	51.13	2.377	1.092	40.47	SAMN22209462	DYMA00000000	biofilm from sulfidic cave	1	1	0
Sulfurovum sp. strain SulCav_PC08_3_2_41_838	97.54	1.229	1.81	40.52	SAMN22209650	DYTG00000000	biofilm from sulfidic cave	0	0	1
Sulfurovum sp. strain SulCav_PC08_3_41_250	86.54	0	1.744	40.6	SAMN22209649	DYTF00000000	biofilm from sulfidic cave	1	4	0
Sulfurovum sp.bin1004	91.49	2.049	1.785	41.17	SAMN29618273	JANTGC000000000	biofilm from sulfidic cave	0	0	2
Sulfurovum sp.SulCav_PC08_66_40_58	75.99	2.507	2.171	39.85	SAMN22209732	DZAK00000000	biofilm from sulfidic cave	0	0	0
Sulfurovum sp.SulCav_PC08_66_42_192	61.77	2.527	1.142	42.46	SAMN22209727	DZAP00000000	biofilm from sulfidic cave	0	1	0
Sulfurovum sp.SulCav_PC08_66_47_82	99.18	0.609	2.289	46.97	SAMN22209725	DZAR00000000	biofilm from sulfidic cave	1	0	0
Sulfurovum sp.SulCav_PC08_66_46_191	94.26	0.819	1.524	46.18	SAMN22209726	DZAQ00000000	biofilm from sulfidic cave	1	0	1
Sulfurovum sp. strain MAG_Cluster_2	96.17	2.459	1.908	33.88	SAMN10431975	SDAZ00000000	colonization device Net 2 floating at the air-water interface of the Frasassi cave system sulfidic spring	0	1	0
Sulfurovum sp. strain BB9	97.54	1.946	2.158	36.82	SAMN16086335	JADGDL000000000	biofilm scrapped from cow tibia surface after nine month of incubation underwater in a fjord	1	1	2
Sulfurovum sp.MC-17	35.74	3.997	1.035	37.93	SAMN17386805	JAFLKE000000000	deep sea mooring chain biofilm	0	0	0
Sediments
Sulfurovum sp. AR	98.77	1.639	2.126	39.24	SAMN02469595	AJLE00000000	marine sediment	1	2	0
Sulfurovum sp. UBA12169	98.77	1.639	1.864	40.77	SAMN07280042	DLUH00000000	sediment	1	1	1
Sulfurovum sp. UBA7648	98.27	0.409	1.674	36.79	SAMN06454691	DLIG00000000	mud	1	0	0
Sulfurovum sp. strain S06.Bin221	91.24	0	1.741	41.61	SAMN13520409	JAABRH000000000	Tibetan lacustrine sediment	1	1	0
Sulfurovum sp. strain GLR145	85.33	6.352	2.203	37.31	SAMN13287934	WTAE00000000	glendhu Ridge methane seep	1	1	0
Sulfurovum sp. strain E29_bin29	64.27	0.136	1.191	37.84	SAMN11124373	SOIK00000000	deep sea sediments associated with petroleum seepage marine sediment metagenome	1	0	0
Sulfurovum sp.D100SM.bin.14	94.82	7.471	2.304	47.26	SAMN23376601	JAKIUI000000000	microbes were collected at L-Dive100-S03	1	1	0
Sulfurovum sp.Thiosulfate_bin.1	93.03	0.204	1.798	40.38	SAMN23227700	JAJPEU000000000	sediment inoculated into enrichment culture with thiosulfate	1	1	1
Sulfurovum sp.D100SM.bin.10	93.03	4.303	2.148	35.31	SAMN23376597	JAKIUE000000000	microbes were collected at JL-Dive100-S03	1	0	2
Sulfurovum sp. TSL6	99.59	2.459	2.255	38.4	SAMD00298284	BPFJ00000000	launched marine sediment by the tsunami accompanying the Great East Japan Earthquake	1	1	0
Sulfurovum sp. TSL1	99.59	4.713	2.353	40.68	SAMD00298283	BPFI00000000	launched marine sediment by the tsunami accompanying the Great East Japan Earthquake	1	2	0
Sulfurovum sp. strain Site_C32	65.86	5.464	1.574	37.62	SAMN14538105	JABDRP000000000	beach sand	1	0	0
Sulfurovum sp. strain IDS-62	67.56	3.688	1.36	37.42	SAMN19246927	JAHHLQ000000000	beach sand	1	0	0
Sulfurovum sp. strain LDS-29	65.86	5.464	1.574	37.62	SAMN19246928	JAHHLR000000000	beach sand	1	0	0
Seawater
Sulfurovum sp. enrichment culture clone C5	94.46	1.229	1.615	32.71	SAMEA3649936	FAXN00000000	hydrocarbon-contaminated sulfidic aquifer	1	0	0
Sulfurovum sp. 17-42-90	95.45	1.229	1.965	41.67	SAMN06622236	NCIS00000000	mine wastewater	1	2	0
Sulfurovum sp. 35-42-20	97.47	2.049	1.902	42.18	SAMN06622319	NCFN00000000	mine wastewater	1	2	0
Sulfurovum sp. 28-43-6	86.36	0.53	1.35	42.96	SAMN06622308	NCFY00000000	mine wastewater	0	1	0
Sulfurovum sp. 16-42-52	97.72	1.024	1.987	41.77	SAMN06622279	NCHB00000000	mine wastewater	1	2	0
Sulfurovum sp. 24-42-9	98.15	1.229	1.949	42.03	SAMN06622269	NCHL00000000	mine wastewater	1	2	0
Sulfurovum sp. 39-42-12	96.99	0.819	1.84	42.31	SAMN06622225	NCJD00000000	mine wastewater	1	2	0
Sulfurovum sp. strain NORP62	91.18	5.327	1.942	35.62	SAMN07568876	NVVN00000000	marine subsurface aquifer	1	1	0
Sulfurovum sp. strain NORP77	90.47	2.176	1.979	38.46	SAMN07568891	NVUY00000000	marine subsurface aquifer	0	2	1
Sulfurovum sp.GYT0_bin.8	97.13	3.747	1.908	37.78	SAMN18738617	JAGSGJ000000000	seawater	1	1	0
Hydrocarbon
Sulfurovum sp. UBA2215	74.98	0.614	1.517	40.52	SAMN06453170	DCUL00000000	suncor tailing pond 6 meters	0	1	1
Sulfurovum sp. UBA2297	90.34	1.024	1.346	34.92	SAMN06457357	DDWB00000000	biofilm hydrocarbon metagenome	1	0	0
Sulfurovum sp. UBA4790	98.77	0.614	1.782	40.47	SAMN06450499	DHGU00000000	suncor tailing pond sample	1	1	1
Sulfurovum sp. UBA4779	98.77	1.024	1.863	41.68	SAMN06450731	DHHF00000000	suncor tailing pond sample	1	1	1
Sulfurovum sp. UBA5198	96.92	0	1.528	34.91	SAMN06453043	DHVW00000000	biofilm	1	0	0
Sulfurovum sp. UBA6199	93.03	0.409	1.772	41.37	SAMN06457393	DISX00000000	waste water	0	1	1
Sulfurovum sp. UBA5622	99.59	0	1.519	36.01	SAMN06456448	DIKI00000000	waste water	1	0	0
Sulfurovum sp. UBA6815	91.78	1.127	1.792	41.35	SAMN06456989	DKET00000000	waste water	0	1	1
Cold seep
Sulfurovum sp.LH_M17	97.95	2.459	1.937	38.7	SAMN18640909	JAGXFO000000000	saline spring sediment	1	1	0
Sulfurovum sp. bin170	83.94	2.066	2.125	36.21	SAMN13716647	JAACKB000000000	cold seep	1	0	1
Other
Sulfurovum sp. strain ERR1163086_bin.4_MetaBAT_v2.12.1_MAG	89.75	0.819	1.66	38.57	SAMEA9694123	CAJXJN000000000	marine metagenome	1	1	1
Sulfurovum sp. SCGC AAA036-F05	29.51	1.229	0.611	33.67	SAMN02441057	AQWF00000000	－	0	0	0
