# Supplementary material for: Transcriptome Analysis of Cyclooctasulfur Oxidation and Reduction by the Neutrophilic Chemolithoautotrophic Sulfurovum indicum from Deep-Sea Hydrothermal Ecosystems
Source: Antioxidants (Basel). 2023 Mar 3;12(3):627. doi: 10.3390/antiox12030627 (PMC10045233; doi:10.3390/antiox12030627)
Supplement: Supplementary file 1 [file antioxidants-12-00627-s001.zip › Table S5.xls]

## Sheet: sheet1
Table S5 Differential expression of genes involved in cysteine and glutathione synthesis under S0 oxidation and reduction.
Gene_id	Gene name	Gene_description	S0 oxidation	Na2S2O3 oxidation	FoldChange	padj	S0 reduction	NaNO3 reduction	FoldChange	padj
IMZ28_RS06745		Glutamate synthase subunit beta	1054.37	672.311	1.56877	0.0379178	2406.7	622.701	3.86538	9.92507e-07
IMZ28_RS08360	metE	Methionine synthase	3542.53	1343.09	2.63782	2.2423e-08	4167.34	651.161	6.39917	2.38572e-11
IMZ28_RS09025	cysK	Cysteine synthase	870.685	492.716	1.76755	0.00217519	799.952	267.087	2.99362	0.000106872
IMZ28_RS09225	glnA	Glutamine synthetase	11832.2	7236.55	1.63505	0.0102457	13255.2	5320.99	2.49104	1.64431e-05
IMZ28_RS02375	cysN	Sulfate adenylyltransferase subunit	1740.89	1036.1	1.68012	0.0143242	1783.04	442.837	4.02514	5.0364e-10
